# Supplementary material
Source: MDPI journal article supplement (https://www.mdpi.com/1099-4300/22/9/1036)
Supplement: s1 [file s1]

# Supplementary Materials for “Regularization Methods Based on the $L_q$ -Likelihood for Linear Models With Heavy-Tailed Errors”

Yoshihiro Hirose\*  
Hokkaido University, Japan

## A Tables

The results of the numerical experiments are presented as tables.

### A.1 Best Performance

The partial results are presented in Tables S1–S22, which report the best result for each method based on the various information criteria. The figures in the manuscript are based on these tables.

The model selection results are reported in Tables S1–S14. Each number shows the number of trials (among  $m = 1,000$  trials) where a method selects the true model. Here, a larger value is better.

The generalization results are reported in Tables S15–S22. To evaluate the generalization error of the proposed methods, we newly make  $m = 1,000$  independent copies  $\{(\mathbf{y}'_1, X'_1), \dots, (\mathbf{y}'_m, X'_m)\}$  in each trial. We computed the difference between  $(\mathbf{y}'_1, \dots, \mathbf{y}'_m)$  and the  $m$  predictions using each of the methods. Each value shows the average prediction error over  $m$  trials. In this case, a smaller value is better.

### A.2 Complete Results

The complete results of the experiments are presented as tables (Tables S23–S34). The case numbers in the tables are shown in Table 1 of the manuscript. In the tables, “a” after the case number indicates the sample size  $n = 100$ , and “b” means  $n = 1,000$ .

The results on model selection are reported in Tables S23–S30. The “Seq” column indicates the number of trials (among  $m = 1,000$  trials) when each sequence of estimates includes the true model. The other columns show the

---

\*Faculty of Information Science and Technology, Hokkaido University. Kita 14, Nishi 9, Kita-ku, Sapporo, Hokkaido, 060-0814 Japan. [hirose@ist.hokudai.ac.jp](mailto:hirose@ist.hokudai.ac.jp)

Table S1: The result on model selection for  $q = 1$  and  $n = 100$ . Each number indicates how many trials a method correctly selects the true model using an appropriate information criterion.

| $\theta_0$ | Method | $r_{\text{nz}} = 0.2$ |           | $r_{\text{nz}} = 0.4$ |           | $r_{\text{nz}} = 0.6$ |           | $r_{\text{nz}} = 0.8$ |           |
|------------|--------|-----------------------|-----------|-----------------------|-----------|-----------------------|-----------|-----------------------|-----------|
|            |        | $d = 10$              | $d = 100$ |
| $10^0$     | LASSO  | 32                    | 0         | 9                     | 0         | 5                     | 0         | 8                     | 0         |
|            | SCAD   | 32                    | 0         | 9                     | 0         | 5                     | 0         | 12                    | 0         |
|            | MCP    | 32                    | 0         | 8                     | 0         | 8                     | 0         | 5                     | 0         |
| $10^1$     | LASSO  | 366                   | 0         | 486                   | 0         | 625                   | 0         | 784                   | 0         |
|            | SCAD   | 710                   | 415       | 719                   | 114       | 768                   | 0         | 812                   | 0         |
|            | MCP    | 778                   | 519       | 793                   | 84        | 797                   | 0         | 813                   | 0         |
| $10^2$     | LASSO  | 366                   | 35        | 487                   | 0         | 627                   | 0         | 788                   | 0         |
|            | SCAD   | 781                   | 1,000     | 782                   | 822       | 808                   | 2         | 821                   | 0         |
|            | MCP    | 802                   | 1,000     | 812                   | 890       | 814                   | 8         | 833                   | 0         |
| $10^3$     | LASSO  | 365                   | 46        | 496                   | 0         | 655                   | 0         | 823                   | 0         |
|            | SCAD   | 781                   | 1,000     | 809                   | 817       | 871                   | 2         | 945                   | 0         |
|            | MCP    | 808                   | 1,000     | 832                   | 889       | 880                   | 4         | 938                   | 0         |

number of trials when a method selects the true model using each information criterion. A larger value is better.

The results on generalization are reported in Tables S31–S34. The “generalization” columns show the average prediction errors over  $m = 1,000$  trials. Here, a smaller value is better.

The symbol “-” indicates that the information criterion is not available. However, in Tables S23 and S31, “-” in a column of a  $L_q$ -criterion means the value is the same as that of the corresponding non- $L_q$ -criterion.

Table S2: The result on model selection for  $q = 1$  and  $n = 1,000$ .

| $\theta_0$ | Method | $r_{nz} = 0.2$ |           | $r_{nz} = 0.4$ |           | $r_{nz} = 0.6$ |           | $r_{nz} = 0.8$ |           |
|------------|--------|----------------|-----------|----------------|-----------|----------------|-----------|----------------|-----------|
|            |        | $d = 10$       | $d = 100$ |
| $10^0$     | LASSO  | 13             | 0         | 7              | 0         | 5              | 0         | 8              | 0         |
|            | SCAD   | 13             | 0         | 7              | 0         | 5              | 0         | 10             | 0         |
|            | MCP    | 13             | 0         | 8              | 0         | 7              | 0         | 12             | 0         |
| $10^1$     | LASSO  | 579            | 28        | 670            | 81        | 774            | 216       | 875            | 417       |
|            | SCAD   | 823            | 485       | 840            | 478       | 851            | 549       | 892            | 673       |
|            | MCP    | 750            | 611       | 781            | 630       | 820            | 655       | 886            | 665       |
| $10^2$     | LASSO  | 577            | 28        | 670            | 85        | 774            | 224       | 875            | 449       |
|            | SCAD   | 828            | 833       | 842            | 847       | 853            | 856       | 891            | 842       |
|            | MCP    | 768            | 753       | 788            | 751       | 823            | 781       | 886            | 790       |
| $10^3$     | LASSO  | 577            | 28        | 670            | 85        | 774            | 226       | 875            | 466       |
|            | SCAD   | 851            | 834       | 878            | 848       | 902            | 873       | 935            | 892       |
|            | MCP    | 778            | 754       | 812            | 760       | 848            | 791       | 906            | 827       |

Table S3: The result on model selection for  $q = 13/11$  and  $n = 100$ .

| $\theta_0$ | Method | $r_{nz} = 0.2$ |           | $r_{nz} = 0.4$ |           | $r_{nz} = 0.6$ |           | $r_{nz} = 0.8$ |           |
|------------|--------|----------------|-----------|----------------|-----------|----------------|-----------|----------------|-----------|
|            |        | $d = 10$       | $d = 100$ |
| $10^0$     | LASSO  | 29             | 0         | 4              | 0         | 3              | 0         | 3              | 0         |
|            | SCAD   | 29             | 0         | 4              | 0         | 1              | 0         | 2              | 0         |
|            | MCP    | 29             | 0         | 4              | 0         | 3              | 0         | 2              | 0         |
| $10^1$     | LASSO  | 796            | 0         | 821            | 0         | 877            | 0         | 939            | 0         |
|            | SCAD   | 896            | 382       | 890            | 55        | 895            | 0         | 939            | 0         |
|            | MCP    | 869            | 588       | 884            | 135       | 901            | 0         | 944            | 0         |
| $10^2$     | LASSO  | 797            | 32        | 821            | 0         | 878            | 0         | 939            | 0         |
|            | SCAD   | 924            | 1,000     | 925            | 822       | 921            | 1         | 953            | 0         |
|            | MCP    | 872            | 1,000     | 885            | 897       | 902            | 7         | 944            | 0         |
| $10^3$     | LASSO  | 797            | 59        | 821            | 0         | 879            | 0         | 940            | 0         |
|            | SCAD   | 929            | 1,000     | 946            | 823       | 953            | 1         | 975            | 0         |
|            | MCP    | 875            | 1,000     | 897            | 886       | 921            | 8         | 959            | 0         |

Table S4: The result on model selection for  $q = 13/11$  and  $n = 1,000$ .

| $\theta_0$ | Method | $r_{nz} = 0.2$ |           | $r_{nz} = 0.4$ |           | $r_{nz} = 0.6$ |           | $r_{nz} = 0.8$ |           |
|------------|--------|----------------|-----------|----------------|-----------|----------------|-----------|----------------|-----------|
|            |        | $d = 10$       | $d = 100$ |
| $10^0$     | LASSO  | 21             | 0         | 3              | 0         | 2              | 0         | 3              | 0         |
|            | SCAD   | 21             | 0         | 2              | 0         | 1              | 0         | 4              | 0         |
|            | MCP    | 22             | 0         | 2              | 0         | 1              | 0         | 1              | 0         |
| $10^1$     | LASSO  | 936            | 658       | 951            | 774       | 965            | 768       | 982            | 785       |
|            | SCAD   | 941            | 585       | 951            | 651       | 965            | 711       | 982            | 838       |
|            | MCP    | 955            | 792       | 958            | 769       | 969            | 792       | 982            | 873       |
| $10^2$     | LASSO  | 936            | 657       | 952            | 786       | 965            | 837       | 982            | 893       |
|            | SCAD   | 978            | 980       | 981            | 981       | 981            | 980       | 985            | 984       |
|            | MCP    | 961            | 939       | 967            | 940       | 975            | 947       | 984            | 956       |
| $10^3$     | LASSO  | 936            | 660       | 952            | 784       | 965            | 838       | 982            | 894       |
|            | SCAD   | 977            | 977       | 983            | 981       | 984            | 982       | 988            | 984       |
|            | MCP    | 961            | 940       | 968            | 944       | 975            | 945       | 984            | 961       |

Table S5: The result on model selection for  $q = 3/2$  and  $n = 100$ .

| $\theta_0$ | Method | $r_{nz} = 0.2$ |           | $r_{nz} = 0.4$ |           | $r_{nz} = 0.6$ |           | $r_{nz} = 0.8$ |           |
|------------|--------|----------------|-----------|----------------|-----------|----------------|-----------|----------------|-----------|
|            |        | $d = 10$       | $d = 100$ |
| $10^0$     | LASSO  | 13             | 0         | 1              | 0         | 0              | 0         | 2              | 0         |
|            | SCAD   | 13             | 0         | 1              | 0         | 2              | 0         | 1              | 0         |
|            | MCP    | 16             | 0         | 1              | 0         | 1              | 0         | 1              | 0         |
| $10^1$     | LASSO  | 946            | 0         | 943            | 0         | 936            | 0         | 924            | 0         |
|            | SCAD   | 947            | 51        | 941            | 4         | 941            | 0         | 933            | 0         |
|            | MCP    | 945            | 264       | 947            | 19        | 947            | 0         | 933            | 0         |
| $10^2$     | LASSO  | 952            | 16        | 958            | 0         | 973            | 0         | 977            | 0         |
|            | SCAD   | 972            | 997       | 971            | 816       | 977            | 0         | 979            | 0         |
|            | MCP    | 965            | 999       | 969            | 887       | 976            | 7         | 978            | 0         |
| $10^3$     | LASSO  | 951            | 41        | 958            | 0         | 973            | 0         | 978            | 0         |
|            | SCAD   | 971            | 1,000     | 971            | 822       | 977            | 1         | 979            | 0         |
|            | MCP    | 965            | 1,000     | 969            | 889       | 976            | 4         | 978            | 0         |

Table S6: The result on model selection for  $q = 3/2$  and  $n = 1,000$ .

| $\theta_0$ | Method | $r_{nz} = 0.2$ |           | $r_{nz} = 0.4$ |           | $r_{nz} = 0.6$ |           | $r_{nz} = 0.8$ |           |
|------------|--------|----------------|-----------|----------------|-----------|----------------|-----------|----------------|-----------|
|            |        | $d = 10$       | $d = 100$ |
| $10^0$     | LASSO  | 7              | 0         | 1              | 0         | 1              | 0         | 1              | 0         |
|            | SCAD   | 8              | 0         | 1              | 0         | 2              | 0         | 0              | 0         |
|            | MCP    | 8              | 0         | 1              | 0         | 2              | 0         | 0              | 0         |
| $10^1$     | LASSO  | 971            | 735       | 967            | 539       | 978            | 376       | 990            | 419       |
|            | SCAD   | 971            | 726       | 966            | 543       | 978            | 421       | 990            | 501       |
|            | MCP    | 971            | 762       | 966            | 651       | 977            | 605       | 989            | 683       |
| $10^2$     | LASSO  | 994            | 963       | 996            | 968       | 996            | 975       | 999            | 973       |
|            | SCAD   | 997            | 994       | 998            | 993       | 998            | 994       | 999            | 996       |
|            | MCP    | 996            | 989       | 997            | 989       | 997            | 984       | 999            | 992       |
| $10^3$     | LASSO  | 994            | 963       | 996            | 967       | 996            | 975       | 999            | 974       |
|            | SCAD   | 998            | 995       | 998            | 993       | 998            | 994       | 999            | 996       |
|            | MCP    | 996            | 989       | 997            | 988       | 997            | 985       | 999            | 993       |

Table S7: The result on model selection for  $q = 5/3$  and  $n = 100$ .

| $\theta_0$ | Method | $r_{nz} = 0.2$ |           | $r_{nz} = 0.4$ |           | $r_{nz} = 0.6$ |           | $r_{nz} = 0.8$ |           |
|------------|--------|----------------|-----------|----------------|-----------|----------------|-----------|----------------|-----------|
|            |        | $d = 10$       | $d = 100$ |
| $10^0$     | LASSO  | 4              | 0         | 1              | 0         | 3              | 0         | 11             | 0         |
|            | SCAD   | 5              | 0         | 1              | 0         | 3              | 0         | 9              | 0         |
|            | MCP    | 4              | 0         | 1              | 0         | 3              | 0         | 5              | 0         |
| $10^1$     | LASSO  | 779            | 0         | 727            | 0         | 722            | 0         | 762            | 0         |
|            | SCAD   | 785            | 1         | 728            | 0         | 722            | 0         | 764            | 0         |
|            | MCP    | 791            | 12        | 739            | 0         | 745            | 0         | 779            | 0         |
| $10^2$     | LASSO  | 929            | 11        | 935            | 0         | 932            | 0         | 947            | 0         |
|            | SCAD   | 953            | 955       | 950            | 770       | 945            | 1         | 952            | 0         |
|            | MCP    | 933            | 956       | 931            | 857       | 935            | 9         | 949            | 0         |
| $10^3$     | LASSO  | 930            | 50        | 933            | 0         | 935            | 0         | 948            | 0         |
|            | SCAD   | 954            | 1,000     | 951            | 815       | 949            | 0         | 964            | 0         |
|            | MCP    | 954            | 1,000     | 934            | 893       | 937            | 3         | 959            | 0         |

Table S8: The result on model selection for  $q = 5/3$  and  $n = 1,000$ .

| $\theta_0$ | Method | $r_{nz} = 0.2$ |           | $r_{nz} = 0.4$ |           | $r_{nz} = 0.6$ |           | $r_{nz} = 0.8$ |           |
|------------|--------|----------------|-----------|----------------|-----------|----------------|-----------|----------------|-----------|
|            |        | $d = 10$       | $d = 100$ |
| $10^0$     | LASSO  | 2              | 0         | 2              | 0         | 2              | 0         | 4              | 0         |
|            | SCAD   | 2              | 0         | 2              | 0         | 2              | 0         | 5              | 0         |
|            | MCP    | 2              | 0         | 1              | 0         | 2              | 0         | 4              | 0         |
| $10^1$     | LASSO  | 810            | 87        | 750            | 22        | 729            | 18        | 794            | 35        |
|            | SCAD   | 810            | 90        | 750            | 27        | 725            | 27        | 798            | 28        |
|            | MCP    | 810            | 106       | 749            | 48        | 731            | 41        | 799            | 58        |
| $10^2$     | LASSO  | 981            | 984       | 984            | 984       | 986            | 975       | 994            | 956       |
|            | SCAD   | 981            | 987       | 984            | 983       | 986            | 977       | 994            | 971       |
|            | MCP    | 983            | 987       | 984            | 982       | 986            | 979       | 994            | 972       |
| $10^3$     | LASSO  | 983            | 988       | 986            | 987       | 986            | 981       | 995            | 969       |
|            | SCAD   | 986            | 989       | 989            | 983       | 990            | 981       | 995            | 974       |
|            | MCP    | 983            | 987       | 986            | 983       | 987            | 981       | 995            | 974       |

Table S9: The result on model selection for  $q = 2$  and  $n = 100$ .

| $\theta_0$ | Method | $r_{nz} = 0.2$ |           | $r_{nz} = 0.4$ |           | $r_{nz} = 0.6$ |           | $r_{nz} = 0.8$ |           |
|------------|--------|----------------|-----------|----------------|-----------|----------------|-----------|----------------|-----------|
|            |        | $d = 10$       | $d = 100$ |
| $10^0$     | LASSO  | 3              | 0         | 2              | 0         | 0              | 0         | 2              | 0         |
|            | SCAD   | 3              | 0         | 2              | 0         | 0              | 0         | 2              | 0         |
|            | MCP    | 3              | 0         | 1              | 0         | 0              | 0         | 2              | 0         |
| $10^1$     | LASSO  | 81             | 0         | 57             | 0         | 53             | 0         | 58             | 0         |
|            | SCAD   | 83             | 0         | 58             | 0         | 50             | 0         | 54             | 0         |
|            | MCP    | 83             | 0         | 57             | 0         | 50             | 0         | 57             | 0         |
| $10^2$     | LASSO  | 821            | 0         | 777            | 0         | 745            | 0         | 732            | 0         |
|            | SCAD   | 823            | 314       | 782            | 219       | 755            | 2         | 735            | 0         |
|            | MCP    | 824            | 357       | 786            | 229       | 756            | 0         | 736            | 0         |
| $10^3$     | LASSO  | 961            | 29        | 935            | 0         | 895            | 0         | 877            | 0         |
|            | SCAD   | 966            | 915       | 944            | 746       | 913            | 1         | 879            | 0         |
|            | MCP    | 967            | 935       | 945            | 820       | 913            | 7         | 879            | 0         |

Table S10: The result on model selection for  $q = 2$  and  $n = 1,000$ .

| $\theta_0$ | Method | $r_{nz} = 0.2$ |           | $r_{nz} = 0.4$ |           | $r_{nz} = 0.6$ |           | $r_{nz} = 0.8$ |           |
|------------|--------|----------------|-----------|----------------|-----------|----------------|-----------|----------------|-----------|
|            |        | $d = 10$       | $d = 100$ |
| $10^0$     | LASSO  | 1              | 0         | 1              | 0         | 0              | 0         | 3              | 0         |
|            | SCAD   | 3              | 0         | 1              | 0         | 0              | 0         | 3              | 0         |
|            | MCP    | 2              | 0         | 0              | 0         | 0              | 0         | 3              | 0         |
| $10^1$     | LASSO  | 5              | 0         | 1              | 0         | 1              | 0         | 1              | 0         |
|            | SCAD   | 5              | 0         | 1              | 0         | 1              | 0         | 1              | 0         |
|            | MCP    | 4              | 0         | 0              | 0         | 0              | 0         | 1              | 0         |
| $10^2$     | LASSO  | 518            | 221       | 476            | 162       | 451            | 132       | 494            | 123       |
|            | SCAD   | 519            | 226       | 475            | 162       | 453            | 142       | 494            | 145       |
|            | MCP    | 518            | 235       | 473            | 200       | 455            | 180       | 495            | 178       |
| $10^3$     | LASSO  | 934            | 910       | 936            | 883       | 941            | 843       | 926            | 779       |
|            | SCAD   | 933            | 910       | 938            | 892       | 942            | 871       | 925            | 840       |
|            | MCP    | 933            | 911       | 938            | 899       | 943            | 884       | 926            | 855       |

Table S11: The result on model selection for  $q = 2.01$  and  $n = 100$ .

| $\theta_0$ | Method | $r_{nz} = 0.2$ |           | $r_{nz} = 0.4$ |           | $r_{nz} = 0.6$ |           | $r_{nz} = 0.8$ |           |
|------------|--------|----------------|-----------|----------------|-----------|----------------|-----------|----------------|-----------|
|            |        | $d = 10$       | $d = 100$ |
| $10^0$     | LASSO  | 1              | 0         | 0              | 0         | 0              | 0         | 1              | 0         |
|            | SCAD   | 2              | 0         | 0              | 0         | 0              | 0         | 1              | 0         |
|            | MCP    | 1              | 0         | 0              | 0         | 0              | 0         | 1              | 0         |
| $10^1$     | LASSO  | 84             | 0         | 44             | 0         | 37             | 0         | 48             | 0         |
|            | SCAD   | 86             | 0         | 45             | 0         | 40             | 0         | 49             | 0         |
|            | MCP    | 87             | 0         | 46             | 0         | 43             | 0         | 52             | 0         |
| $10^2$     | LASSO  | 834            | 1         | 793            | 0         | 775            | 0         | 773            | 0         |
|            | SCAD   | 835            | 338       | 792            | 210       | 774            | 0         | 772            | 0         |
|            | MCP    | 834            | 377       | 799            | 232       | 788            | 3         | 776            | 0         |
| $10^3$     | LASSO  | 971            | 22        | 961            | 0         | 937            | 0         | 921            | 0         |
|            | SCAD   | 972            | 894       | 961            | 737       | 936            | 1         | 927            | 0         |
|            | MCP    | 973            | 916       | 960            | 810       | 939            | 3         | 930            | 0         |

Table S12: The result on model selection for  $q = 2.01$  and  $n = 1,000$ .

| $\theta_0$ | Method | $r_{nz} = 0.2$ |           | $r_{nz} = 0.4$ |           | $r_{nz} = 0.6$ |           | $r_{nz} = 0.8$ |           |
|------------|--------|----------------|-----------|----------------|-----------|----------------|-----------|----------------|-----------|
|            |        | $d = 10$       | $d = 100$ |
| $10^0$     | LASSO  | 2              | 0         | 0              | 0         | 0              | 0         | 1              | 0         |
|            | SCAD   | 3              | 0         | 0              | 0         | 0              | 0         | 1              | 0         |
|            | MCP    | 1              | 0         | 0              | 0         | 0              | 0         | 1              | 0         |
| $10^1$     | LASSO  | 6              | 0         | 1              | 0         | 1              | 0         | 3              | 0         |
|            | SCAD   | 6              | 0         | 1              | 0         | 1              | 0         | 3              | 0         |
|            | MCP    | 2              | 0         | 0              | 0         | 1              | 0         | 3              | 0         |
| $10^2$     | LASSO  | 493            | 161       | 447            | 124       | 441            | 92        | 466            | 85        |
|            | SCAD   | 493            | 165       | 445            | 123       | 442            | 94        | 464            | 107       |
|            | MCP    | 495            | 174       | 443            | 144       | 445            | 134       | 463            | 143       |
| $10^3$     | LASSO  | 931            | 871       | 928            | 839       | 933            | 808       | 922            | 757       |
|            | SCAD   | 931            | 872       | 929            | 846       | 935            | 826       | 920            | 815       |
|            | MCP    | 931            | 875       | 929            | 861       | 935            | 844       | 921            | 827       |

Table S13: The result on model selection for  $q = 2.1$  and  $n = 100$ .

| $\theta_0$ | Method | $r_{nz} = 0.2$ |           | $r_{nz} = 0.4$ |           | $r_{nz} = 0.6$ |           | $r_{nz} = 0.8$ |           |
|------------|--------|----------------|-----------|----------------|-----------|----------------|-----------|----------------|-----------|
|            |        | $d = 10$       | $d = 100$ |
| $10^0$     | LASSO  | 2              | 0         | 0              | 0         | 0              | 0         | 3              | 0         |
|            | SCAD   | 2              | 0         | 0              | 0         | 0              | 0         | 3              | 0         |
|            | MCP    | 3              | 0         | 0              | 0         | 0              | 0         | 3              | 0         |
| $10^1$     | LASSO  | 6              | 0         | 9              | 0         | 4              | 0         | 6              | 0         |
|            | SCAD   | 6              | 0         | 9              | 0         | 4              | 0         | 4              | 0         |
|            | MCP    | 4              | 0         | 10             | 0         | 5              | 0         | 5              | 0         |
| $10^2$     | LASSO  | 619            | 0         | 553            | 0         | 512            | 0         | 545            | 0         |
|            | SCAD   | 618            | 117       | 554            | 53        | 525            | 0         | 535            | 0         |
|            | MCP    | 621            | 139       | 564            | 58        | 537            | 0         | 545            | 0         |
| $10^3$     | LASSO  | 903            | 9         | 881            | 0         | 864            | 0         | 854            | 0         |
|            | SCAD   | 903            | 753       | 890            | 612       | 866            | 1         | 846            | 0         |
|            | MCP    | 904            | 778       | 892            | 652       | 871            | 3         | 847            | 0         |

Table S14: The result on model selection for  $q = 2.1$  and  $n = 1,000$ .

| $\theta_0$ | Method | $r_{\text{nz}} = 0.2$ |           | $r_{\text{nz}} = 0.4$ |           | $r_{\text{nz}} = 0.6$ |           | $r_{\text{nz}} = 0.8$ |           |
|------------|--------|-----------------------|-----------|-----------------------|-----------|-----------------------|-----------|-----------------------|-----------|
|            |        | $d = 10$              | $d = 100$ |
| $10^0$     | LASSO  | 6                     | 0         | 1                     | 0         | 0                     | 0         | 0                     | 0         |
|            | SCAD   | 6                     | 0         | 1                     | 0         | 0                     | 0         | 0                     | 0         |
|            | MCP    | 4                     | 0         | 1                     | 0         | 0                     | 0         | 0                     | 0         |
| $10^1$     | LASSO  | 4                     | 0         | 0                     | 0         | 0                     | 0         | 0                     | 0         |
|            | SCAD   | 4                     | 0         | 0                     | 0         | 0                     | 0         | 0                     | 0         |
|            | MCP    | 4                     | 0         | 0                     | 0         | 0                     | 0         | 0                     | 0         |
| $10^2$     | LASSO  | 118                   | 3         | 82                    | 1         | 92                    | 0         | 106                   | 0         |
|            | SCAD   | 118                   | 3         | 84                    | 2         | 89                    | 0         | 105                   | 0         |
|            | MCP    | 119                   | 4         | 81                    | 3         | 90                    | 1         | 105                   | 1         |
| $10^3$     | LASSO  | 759                   | 556       | 744                   | 514       | 734                   | 474       | 732                   | 422       |
|            | SCAD   | 758                   | 558       | 741                   | 526       | 732                   | 498       | 730                   | 472       |
|            | MCP    | 758                   | 560       | 743                   | 544       | 734                   | 518       | 731                   | 513       |

Table S15: The result on generalization for  $q = 1$  and  $n = 100$ . Each value indicates the average generalization error among  $m = 1,000$  trials.

| $\theta_0$ | Method | $r_{\text{nz}} = 0.2$ |           | $r_{\text{nz}} = 0.4$ |           | $r_{\text{nz}} = 0.6$ |           | $r_{\text{nz}} = 0.8$ |           |
|------------|--------|-----------------------|-----------|-----------------------|-----------|-----------------------|-----------|-----------------------|-----------|
|            |        | $d = 10$              | $d = 100$ |
| $10^0$     | LASSO  | 1.03                  | 1.18      | 1.05                  | 1.31      | 1.06                  | 1.40      | 1.07                  | 1.47      |
|            | SCAD   | 1.04                  | 1.19      | 1.05                  | 1.34      | 1.07                  | 1.49      | 1.08                  | 1.64      |
|            | MCP    | 1.05                  | 1.20      | 1.06                  | 1.37      | 1.07                  | 1.53      | 1.09                  | 1.70      |
| $10^1$     | LASSO  | 1.07                  | 1.55      | 1.09                  | 2.53      | 1.11                  | 3.78      | 1.11                  | 4.76      |
|            | SCAD   | 1.04                  | 1.22      | 1.06                  | 1.86      | 1.08                  | 3.05      | 1.10                  | 3.54      |
|            | MCP    | 1.04                  | 1.22      | 1.06                  | 1.73      | 1.08                  | 2.68      | 1.10                  | 3.02      |
| $10^2$     | LASSO  | 1.07                  | 21.02     | 1.09                  | 99.2      | 1.10                  | 225.5     | 1.11                  | 321.6     |
|            | SCAD   | 1.04                  | 1.20      | 1.06                  | 16.5      | 1.08                  | 127.7     | 1.10                  | 174.2     |
|            | MCP    | 1.04                  | 1.20      | 1.06                  | 7.88      | 1.08                  | 85.2      | 1.10                  | 119.1     |
| $10^3$     | LASSO  | 1.07                  | 1984      | 1.11                  | 9762      | 1.17                  | 22405     | 1.23                  | 32013     |
|            | SCAD   | 1.04                  | 1.20      | 1.06                  | 1557      | 1.07                  | 12795     | 1.09                  | 17287     |
|            | MCP    | 1.04                  | 1.20      | 1.06                  | 636       | 1.08                  | 8537      | 1.09                  | 11803     |

Table S16: The result on generalization for  $q = 1$  and  $n = 1,000$ .

| $\theta_0$ | Method | $r_{\text{nz}} = 0.2$ |           | $r_{\text{nz}} = 0.4$ |           | $r_{\text{nz}} = 0.6$ |           | $r_{\text{nz}} = 0.8$ |           |
|------------|--------|-----------------------|-----------|-----------------------|-----------|-----------------------|-----------|-----------------------|-----------|
|            |        | $d = 10$              | $d = 100$ |
| $10^0$     | LASSO  | 1.00                  | 1.02      | 1.00                  | 1.04      | 1.01                  | 1.05      | 1.01                  | 1.06      |
|            | SCAD   | 1.00                  | 1.02      | 1.00                  | 1.04      | 1.01                  | 1.05      | 1.01                  | 1.07      |
|            | MCP    | 1.00                  | 1.02      | 1.00                  | 1.04      | 1.01                  | 1.06      | 1.01                  | 1.07      |
| $10^1$     | LASSO  | 1.01                  | 1.05      | 1.01                  | 1.08      | 1.01                  | 1.09      | 1.01                  | 1.10      |
|            | SCAD   | 1.00                  | 1.02      | 1.00                  | 1.04      | 1.01                  | 1.06      | 1.01                  | 1.08      |
|            | MCP    | 1.00                  | 1.02      | 1.01                  | 1.04      | 1.01                  | 1.06      | 1.01                  | 1.08      |
| $10^2$     | LASSO  | 1.01                  | 1.05      | 1.01                  | 1.08      | 1.01                  | 1.09      | 1.01                  | 1.10      |
|            | SCAD   | 1.00                  | 1.02      | 1.00                  | 1.04      | 1.01                  | 1.06      | 1.01                  | 1.08      |
|            | MCP    | 1.00                  | 1.02      | 1.01                  | 1.04      | 1.01                  | 1.06      | 1.01                  | 1.08      |
| $10^3$     | LASSO  | 1.01                  | 1.06      | 1.01                  | 1.13      | 1.01                  | 1.22      | 1.02                  | 1.33      |
|            | SCAD   | 1.00                  | 1.02      | 1.00                  | 1.04      | 1.01                  | 1.06      | 1.01                  | 1.08      |
|            | MCP    | 1.00                  | 1.02      | 1.01                  | 1.04      | 1.01                  | 1.06      | 1.01                  | 1.08      |

Table S17: The result on generalization for  $q = 13/11$  and  $n = 100$ .

| $\theta_0$ | Method | $r_{nz} = 0.2$ |           | $r_{nz} = 0.4$ |           | $r_{nz} = 0.6$ |           | $r_{nz} = 0.8$ |           |
|------------|--------|----------------|-----------|----------------|-----------|----------------|-----------|----------------|-----------|
|            |        | $d = 10$       | $d = 100$ |
| $10^0$     | LASSO  | 1.27           | 1.46      | 1.29           | 1.63      | 1.31           | 1.73      | 1.32           | 1.81      |
|            | SCAD   | 1.27           | 1.47      | 1.29           | 1.63      | 1.31           | 1.78      | 1.33           | 1.92      |
|            | MCP    | 1.27           | 1.47      | 1.29           | 1.65      | 1.31           | 1.81      | 1.33           | 1.97      |
| $10^1$     | LASSO  | 1.33           | 1.93      | 1.36           | 2.95      | 1.37           | 4.17      | 1.38           | 5.19      |
|            | SCAD   | 1.29           | 1.55      | 1.31           | 2.39      | 1.34           | 3.51      | 1.36           | 4.03      |
|            | MCP    | 1.29           | 1.55      | 1.31           | 2.24      | 1.34           | 3.12      | 1.36           | 3.51      |
| $10^2$     | LASSO  | 1.33           | 21.20     | 1.36           | 100.23    | 1.37           | 224.32    | 1.38           | 325.87    |
|            | SCAD   | 1.28           | 1.52      | 1.31           | 17.21     | 1.33           | 127.43    | 1.36           | 177.62    |
|            | MCP    | 1.29           | 1.52      | 1.31           | 7.86      | 1.34           | 85.82     | 1.36           | 122.05    |
| $10^3$     | LASSO  | 1.32           | 1965      | 1.37           | 9830      | 1.43           | 22282     | 1.51           | 32492     |
|            | SCAD   | 1.28           | 1.52      | 1.31           | 1540      | 1.33           | 12921     | 1.36           | 18310     |
|            | MCP    | 1.29           | 1.52      | 1.31           | 728       | 1.33           | 8716      | 1.36           | 12433     |

Table S18: The result on generalization for  $q = 13/11$  and  $n = 1,000$ .

| $\theta_0$ | Method | $r_{nz} = 0.2$ |           | $r_{nz} = 0.4$ |           | $r_{nz} = 0.6$ |           | $r_{nz} = 0.8$ |           |
|------------|--------|----------------|-----------|----------------|-----------|----------------|-----------|----------------|-----------|
|            |        | $d = 10$       | $d = 100$ |
| $10^0$     | LASSO  | 1.25           | 1.27      | 1.26           | 1.29      | 1.26           | 1.30      | 1.26           | 1.32      |
|            | SCAD   | 1.25           | 1.27      | 1.26           | 1.29      | 1.26           | 1.30      | 1.26           | 1.32      |
|            | MCP    | 1.25           | 1.27      | 1.26           | 1.29      | 1.26           | 1.31      | 1.26           | 1.33      |
| $10^1$     | LASSO  | 1.26           | 1.32      | 1.26           | 1.35      | 1.26           | 1.36      | 1.26           | 1.37      |
|            | SCAD   | 1.25           | 1.28      | 1.26           | 1.30      | 1.26           | 1.33      | 1.26           | 1.35      |
|            | MCP    | 1.25           | 1.28      | 1.26           | 1.30      | 1.26           | 1.33      | 1.26           | 1.35      |
| $10^2$     | LASSO  | 1.26           | 1.32      | 1.26           | 1.35      | 1.26           | 1.36      | 1.26           | 1.37      |
|            | SCAD   | 1.25           | 1.28      | 1.26           | 1.30      | 1.26           | 1.33      | 1.26           | 1.35      |
|            | MCP    | 1.25           | 1.28      | 1.26           | 1.30      | 1.26           | 1.33      | 1.26           | 1.35      |
| $10^3$     | LASSO  | 1.26           | 1.32      | 1.26           | 1.39      | 1.27           | 1.49      | 1.27           | 1.60      |
|            | SCAD   | 1.25           | 1.28      | 1.26           | 1.30      | 1.26           | 1.33      | 1.26           | 1.35      |
|            | MCP    | 1.25           | 1.28      | 1.26           | 1.30      | 1.26           | 1.33      | 1.26           | 1.35      |

Table S19: The result on generalization for  $q = 3/2$  and  $n = 100$ .

| $\theta_0$ | Method | $r_{nz} = 0.2$ |           | $r_{nz} = 0.4$ |           | $r_{nz} = 0.6$ |           | $r_{nz} = 0.8$ |           |
|------------|--------|----------------|-----------|----------------|-----------|----------------|-----------|----------------|-----------|
|            |        | $d = 10$       | $d = 100$ |
| $10^0$     | LASSO  | 2.87           | 3.29      | 2.89           | 3.50      | 2.91           | 3.68      | 2.93           | 3.83      |
|            | SCAD   | 2.87           | 3.29      | 2.89           | 3.50      | 2.91           | 3.67      | 2.93           | 3.83      |
|            | MCP    | 2.88           | 3.32      | 2.89           | 3.51      | 2.91           | 3.69      | 2.93           | 3.87      |
| $10^1$     | LASSO  | 3.00           | 4.65      | 3.07           | 5.82      | 3.11           | 7.05      | 3.13           | 8.09      |
|            | SCAD   | 2.94           | 4.47      | 3.01           | 6.04      | 3.07           | 6.90      | 3.11           | 7.44      |
|            | MCP    | 2.93           | 5.50      | 3.01           | 5.93      | 3.06           | 6.58      | 3.10           | 6.95      |
| $10^2$     | LASSO  | 3.01           | 23.33     | 3.08           | 103.52    | 3.11           | 229.03    | 3.14           | 331.08    |
|            | SCAD   | 2.91           | 3.72      | 2.96           | 46.11     | 3.02           | 133.22    | 3.08           | 180.93    |
|            | MCP    | 2.91           | 3.72      | 2.97           | 11.23     | 3.02           | 91.05     | 3.09           | 125.76    |
| $10^3$     | LASSO  | 3.00           | 1973      | 3.08           | 9900      | 3.16           | 22441     | 3.26           | 32653     |
|            | SCAD   | 2.91           | 3.72      | 2.96           | 1523      | 3.02           | 12689     | 3.08           | 18575     |
|            | MCP    | 2.91           | 3.72      | 2.97           | 677       | 3.02           | 8584      | 3.08           | 12104     |



Table S20: The result on generalization for  $q = 3/2$  and  $n = 1,000$ .

| $\theta_0$ | Method | $r_{nz} = 0.2$ |           | $r_{nz} = 0.4$ |           | $r_{nz} = 0.6$ |           | $r_{nz} = 0.8$ |           |
|------------|--------|----------------|-----------|----------------|-----------|----------------|-----------|----------------|-----------|
|            |        | $d = 10$       | $d = 100$ |
| $10^0$     | LASSO  | 2.92           | 2.92      | 2.92           | 2.94      | 2.92           | 2.96      | 2.93           | 2.98      |
|            | SCAD   | 2.92           | 2.92      | 2.92           | 2.94      | 2.92           | 2.96      | 2.93           | 2.98      |
|            | MCP    | 2.92           | 2.92      | 2.92           | 2.94      | 2.92           | 2.96      | 2.93           | 2.98      |
| $10^1$     | LASSO  | 2.93           | 3.05      | 2.94           | 3.12      | 2.95           | 3.17      | 2.95           | 3.19      |
|            | SCAD   | 2.93           | 2.99      | 2.94           | 3.05      | 2.94           | 3.11      | 2.95           | 3.16      |
|            | MCP    | 2.93           | 2.99      | 2.94           | 3.05      | 2.94           | 3.11      | 2.95           | 3.16      |
| $10^2$     | LASSO  | 2.93           | 3.05      | 2.94           | 3.12      | 2.95           | 3.17      | 2.95           | 3.19      |
|            | SCAD   | 2.92           | 2.96      | 2.93           | 3.02      | 2.94           | 3.08      | 2.94           | 3.14      |
|            | MCP    | 2.92           | 2.96      | 2.93           | 3.02      | 2.94           | 3.08      | 2.94           | 3.14      |
| $10^3$     | LASSO  | 2.93           | 3.05      | 2.94           | 3.14      | 2.95           | 3.26      | 2.96           | 3.40      |
|            | SCAD   | 2.92           | 2.96      | 2.93           | 3.02      | 2.94           | 3.08      | 2.94           | 3.14      |
|            | MCP    | 2.93           | 2.96      | 2.93           | 3.02      | 2.94           | 3.08      | 2.94           | 3.14      |

Table S21: The result on generalization for  $q = 5/3$  and  $n = 100$ .

| $\theta_0$ | Method | $r_{nz} = 0.2$ |           | $r_{nz} = 0.4$ |           | $r_{nz} = 0.6$ |           | $r_{nz} = 0.8$ |           |
|------------|--------|----------------|-----------|----------------|-----------|----------------|-----------|----------------|-----------|
|            |        | $d = 10$       | $d = 100$ |
| $10^0$     | LASSO  | 10.68          | 14.07     | 10.71          | 14.26     | 10.72          | 14.46     | 10.74          | 14.65     |
|            | SCAD   | 10.68          | 14.07     | 10.71          | 14.26     | 10.72          | 14.47     | 10.74          | 14.66     |
|            | MCP    | 10.69          | 14.09     | 10.71          | 14.29     | 10.72          | 14.49     | 10.74          | 14.69     |
| $10^1$     | LASSO  | 11.04          | 17.72     | 11.23          | 19.45     | 11.32          | 21.00     | 11.40          | 22.28     |
|            | SCAD   | 10.97          | 18.85     | 11.18          | 21.89     | 11.31          | 22.62     | 11.41          | 25.29     |
|            | MCP    | 10.97          | 19.12     | 11.19          | 22.11     | 11.33          | 23.14     | 11.42          | 24.98     |
| $10^2$     | LASSO  | 11.32          | 37.51     | 11.64          | 120.93    | 11.74          | 245.48    | 11.78          | 346.97    |
|            | SCAD   | 11.00          | 18.13     | 11.31          | 38.66     | 11.51          | 149.72    | 11.65          | 199.80    |
|            | MCP    | 11.00          | 18.05     | 11.30          | 27.55     | 11.51          | 107.95    | 11.66          | 144.35    |
| $10^3$     | LASSO  | 11.31          | 1978.49   | 11.65          | 10079     | 11.77          | 22466     | 11.89          | 32608     |
|            | SCAD   | 10.89          | 16.41     | 11.18          | 1627      | 11.39          | 12520     | 11.60          | 17490     |
|            | MCP    | 10.90          | 16.41     | 11.18          | 664       | 11.39          | 8513      | 11.61          | 12066     |

Table S22: The result on generalization for  $q = 5/3$  and  $n = 1,000$ .

| $\theta_0$ | Method | $r_{nz} = 0.2$ |           | $r_{nz} = 0.4$ |           | $r_{nz} = 0.6$ |           | $r_{nz} = 0.8$ |           |
|------------|--------|----------------|-----------|----------------|-----------|----------------|-----------|----------------|-----------|
|            |        | $d = 10$       | $d = 100$ |
| $10^0$     | LASSO  | 25.40          | 12.63     | 25.41          | 12.65     | 25.41          | 12.67     | 25.41          | 12.69     |
|            | SCAD   | 25.40          | 12.63     | 25.41          | 12.65     | 25.41          | 12.67     | 25.41          | 12.69     |
|            | MCP    | 25.40          | 12.63     | 25.41          | 12.65     | 25.41          | 12.67     | 25.41          | 12.69     |
| $10^1$     | LASSO  | 25.45          | 13.08     | 25.48          | 13.32     | 25.49          | 13.49     | 25.50          | 13.59     |
|            | SCAD   | 25.45          | 13.07     | 25.48          | 13.34     | 25.50          | 13.52     | 25.50          | 13.63     |
|            | MCP    | 25.45          | 13.08     | 25.47          | 13.35     | 25.50          | 13.53     | 25.51          | 13.64     |
| $10^2$     | LASSO  | 25.48          | 13.25     | 25.53          | 13.57     | 25.57          | 13.75     | 25.58          | 13.84     |
|            | SCAD   | 25.45          | 12.90     | 25.49          | 13.17     | 25.54          | 13.42     | 25.57          | 13.66     |
|            | MCP    | 25.45          | 12.90     | 25.50          | 13.18     | 25.54          | 13.41     | 25.57          | 13.66     |
| $10^3$     | LASSO  | 25.52          | 13.25     | 25.56          | 13.57     | 25.58          | 13.79     | 25.65          | 14.00     |
|            | SCAD   | 25.44          | 12.85     | 25.47          | 13.11     | 25.50          | 13.37     | 25.59          | 13.63     |
|            | MCP    | 25.43          | 12.85     | 25.47          | 13.11     | 25.50          | 13.37     | 25.59          | 13.63     |

Table S23: The results on model selection for  $q = 1$  (the normal error). Note that, when  $q = 1$ ,  $L_q$ -criteria are equivalent to the original criteria, respectively.

| Case | Method | Seq  | AIC1 | AIC2 | BIC1 | BIC2 | $L_q$ -A1 | $L_q$ -A2 | $L_q$ -B1 | $L_q$ -B2 | CV   |
|------|--------|------|------|------|------|------|-----------|-----------|-----------|-----------|------|
| 1a   | LASSO  | 71   | 10   | 4    | 32   | 12   | -         | -         | -         | -         | 7    |
|      | SCAD   | 69   | 10   | 7    | 32   | 16   | -         | -         | -         | -         | 8    |
|      | MCP    | 67   | 10   | 7    | 32   | 16   | -         | -         | -         | -         | 11   |
| 1b   | LASSO  | 67   | 8    | 4    | 13   | 3    | -         | -         | -         | -         | 7    |
|      | SCAD   | 68   | 8    | 4    | 13   | 5    | -         | -         | -         | -         | 5    |
|      | MCP    | 67   | 9    | 6    | 13   | 8    | -         | -         | -         | -         | 9    |
| 2a   | LASSO  | 1000 | 53   | 37   | 366  | 219  | -         | -         | -         | -         | 125  |
|      | SCAD   | 1000 | 45   | 186  | 340  | 676  | -         | -         | -         | -         | 710  |
|      | MCP    | 1000 | 44   | 121  | 340  | 546  | -         | -         | -         | -         | 778  |
| 2b   | LASSO  | 1000 | 39   | 28   | 579  | 401  | -         | -         | -         | -         | 155  |
|      | SCAD   | 1000 | 38   | 184  | 578  | 823  | -         | -         | -         | -         | 689  |
|      | MCP    | 1000 | 38   | 119  | 578  | 738  | -         | -         | -         | -         | 750  |
| 3a   | LASSO  | 1000 | 54   | 34   | 366  | 220  | -         | -         | -         | -         | 126  |
|      | SCAD   | 1000 | 46   | 185  | 340  | 675  | -         | -         | -         | -         | 781  |
|      | MCP    | 1000 | 46   | 122  | 339  | 544  | -         | -         | -         | -         | 802  |
| 3b   | LASSO  | 1000 | 39   | 27   | 577  | 405  | -         | -         | -         | -         | 155  |
|      | SCAD   | 1000 | 39   | 183  | 577  | 828  | -         | -         | -         | -         | 733  |
|      | MCP    | 1000 | 39   | 121  | 577  | 740  | -         | -         | -         | -         | 768  |
| 4a   | LASSO  | 1000 | 75   | 123  | 365  | 293  | -         | -         | -         | -         | 140  |
|      | SCAD   | 1000 | 57   | 364  | 340  | 738  | -         | -         | -         | -         | 781  |
|      | MCP    | 1000 | 58   | 250  | 339  | 581  | -         | -         | -         | -         | 808  |
| 4b   | LASSO  | 1000 | 45   | 119  | 577  | 440  | -         | -         | -         | -         | 162  |
|      | SCAD   | 1000 | 41   | 356  | 577  | 851  | -         | -         | -         | -         | 747  |
|      | MCP    | 1000 | 41   | 249  | 577  | 756  | -         | -         | -         | -         | 778  |
| 5a   | LASSO  | 0    | -    | 0    | -    | 0    | -         | -         | -         | -         | 0    |
|      | SCAD   | 0    | -    | 0    | -    | 0    | -         | -         | -         | -         | 0    |
|      | MCP    | 0    | -    | 0    | -    | 0    | -         | -         | -         | -         | 0    |
| 5b   | LASSO  | 0    | 0    | 0    | 0    | 0    | -         | -         | -         | -         | 0    |
|      | SCAD   | 0    | 0    | 0    | 0    | 0    | -         | -         | -         | -         | 0    |
|      | MCP    | 0    | 0    | 0    | 0    | 0    | -         | -         | -         | -         | 0    |
| 6a   | LASSO  | 20   | -    | 0    | -    | 0    | -         | -         | -         | -         | 0    |
|      | SCAD   | 752  | -    | 23   | -    | 415  | -         | -         | -         | -         | 171  |
|      | MCP    | 985  | -    | 0    | -    | 79   | -         | -         | -         | -         | 519  |
| 6b   | LASSO  | 1000 | 0    | 0    | 28   | 0    | -         | -         | -         | -         | 0    |
|      | SCAD   | 1000 | 0    | 3    | 6    | 485  | -         | -         | -         | -         | 107  |
|      | MCP    | 1000 | 0    | 0    | 6    | 611  | -         | -         | -         | -         | 479  |
| 7a   | LASSO  | 58   | -    | 35   | -    | 35   | -         | -         | -         | -         | 35   |
|      | SCAD   | 1000 | -    | 1000 | -    | 1000 | -         | -         | -         | -         | 1000 |
|      | MCP    | 1000 | -    | 1000 | -    | 1000 | -         | -         | -         | -         | 1000 |
| 7b   | LASSO  | 1000 | 0    | 0    | 28   | 0    | -         | -         | -         | -         | 0    |
|      | SCAD   | 1000 | 0    | 3    | 8    | 833  | -         | -         | -         | -         | 643  |
|      | MCP    | 1000 | 0    | 0    | 8    | 626  | -         | -         | -         | -         | 753  |
| 8a   | LASSO  | 46   | -    | 46   | -    | 46   | -         | -         | -         | -         | 46   |
|      | SCAD   | 1000 | -    | 1000 | -    | 1000 | -         | -         | -         | -         | 1000 |
|      | MCP    | 1000 | -    | 1000 | -    | 1000 | -         | -         | -         | -         | 1000 |
| 8b   | LASSO  | 1000 | 0    | 0    | 28   | 0    | -         | -         | -         | -         | 0    |
|      | SCAD   | 1000 | 0    | 2    | 7    | 834  | -         | -         | -         | -         | 651  |
|      | MCP    | 1000 | 0    | 4    | 7    | 631  | -         | -         | -         | -         | 754  |
| 9a   | LASSO  | 22   | 9    | 2    | 7    | 3    | -         | -         | -         | -         | 3    |
|      | SCAD   | 22   | 9    | 2    | 7    | 5    | -         | -         | -         | -         | 4    |
|      | MCP    | 21   | 8    | 4    | 6    | 5    | -         | -         | -         | -         | 3    |
| 9b   | LASSO  | 15   | 7    | 4    | 1    | 2    | -         | -         | -         | -         | 2    |
|      | SCAD   | 16   | 7    | 3    | 1    | 4    | -         | -         | -         | -         | 1    |
|      | MCP    | 18   | 8    | 5    | 1    | 4    | -         | -         | -         | -         | 1    |

| Case | Method | Seq  | AIC1 | AIC2 | BIC1 | BIC2 | $L_q$ -A1 | $L_q$ -A2 | $L_q$ -B1 | $L_q$ -B2 | CV  |
|------|--------|------|------|------|------|------|-----------|-----------|-----------|-----------|-----|
| 10a  | LASSO  | 999  | 112  | 24   | 486  | 93   | -         | -         | -         | -         | 39  |
|      | SCAD   | 1000 | 100  | 239  | 448  | 689  | -         | -         | -         | -         | 719 |
|      | MCP    | 1000 | 100  | 179  | 448  | 593  | -         | -         | -         | -         | 793 |
| 10b  | LASSO  | 1000 | 90   | 19   | 670  | 240  | -         | -         | -         | -         | 52  |
|      | SCAD   | 1000 | 89   | 226  | 672  | 840  | -         | -         | -         | -         | 713 |
|      | MCP    | 1000 | 89   | 178  | 672  | 781  | -         | -         | -         | -         | 771 |
| 11a  | LASSO  | 1000 | 111  | 21   | 487  | 92   | -         | -         | -         | -         | 38  |
|      | SCAD   | 1000 | 100  | 236  | 449  | 691  | -         | -         | -         | -         | 782 |
|      | MCP    | 1000 | 100  | 178  | 449  | 593  | -         | -         | -         | -         | 812 |
| 11b  | LASSO  | 1000 | 90   | 20   | 670  | 246  | -         | -         | -         | -         | 54  |
|      | SCAD   | 1000 | 89   | 227  | 672  | 842  | -         | -         | -         | -         | 758 |
|      | MCP    | 1000 | 89   | 177  | 672  | 778  | -         | -         | -         | -         | 788 |
| 12a  | LASSO  | 1000 | 204  | 221  | 496  | 310  | -         | -         | -         | -         | 170 |
|      | SCAD   | 1000 | 202  | 504  | 452  | 784  | -         | -         | -         | -         | 809 |
|      | MCP    | 1000 | 202  | 412  | 452  | 674  | -         | -         | -         | -         | 832 |
| 12b  | LASSO  | 1000 | 125  | 159  | 670  | 345  | -         | -         | -         | -         | 122 |
|      | SCAD   | 1000 | 122  | 452  | 672  | 878  | -         | -         | -         | -         | 777 |
|      | MCP    | 1000 | 122  | 352  | 672  | 794  | -         | -         | -         | -         | 812 |
| 13a  | LASSO  | 0    | -    | 0    | -    | 0    | -         | -         | -         | -         | 0   |
|      | SCAD   | 0    | -    | 0    | -    | 0    | -         | -         | -         | -         | 0   |
|      | MCP    | 0    | -    | 0    | -    | 0    | -         | -         | -         | -         | 0   |
| 13b  | LASSO  | 0    | 0    | 0    | 0    | 0    | -         | -         | -         | -         | 0   |
|      | SCAD   | 0    | 0    | 0    | 0    | 0    | -         | -         | -         | -         | 0   |
|      | MCP    | 0    | 0    | 0    | 0    | 0    | -         | -         | -         | -         | 0   |
| 14a  | LASSO  | 0    | -    | 0    | -    | 0    | -         | -         | -         | -         | 0   |
|      | SCAD   | 129  | -    | 61   | -    | 114  | -         | -         | -         | -         | 3   |
|      | MCP    | 311  | -    | 20   | -    | 84   | -         | -         | -         | -         | 18  |
| 14b  | LASSO  | 988  | 0    | 0    | 81   | 0    | -         | -         | -         | -         | 0   |
|      | SCAD   | 995  | 0    | 3    | 16   | 478  | -         | -         | -         | -         | 98  |
|      | MCP    | 999  | 0    | 0    | 16   | 630  | -         | -         | -         | -         | 473 |
| 15a  | LASSO  | 0    | -    | 0    | -    | 0    | -         | -         | -         | -         | 0   |
|      | SCAD   | 822  | -    | 822  | -    | 822  | -         | -         | -         | -         | 732 |
|      | MCP    | 890  | -    | 890  | -    | 890  | -         | -         | -         | -         | 851 |
| 15b  | LASSO  | 1000 | 0    | 0    | 85   | 0    | -         | -         | -         | -         | 0   |
|      | SCAD   | 1000 | 0    | 5    | 16   | 847  | -         | -         | -         | -         | 684 |
|      | MCP    | 1000 | 0    | 0    | 16   | 646  | -         | -         | -         | -         | 751 |
| 16a  | LASSO  | 0    | -    | 0    | -    | 0    | -         | -         | -         | -         | 0   |
|      | SCAD   | 817  | -    | 817  | -    | 817  | -         | -         | -         | -         | 719 |
|      | MCP    | 889  | -    | 889  | -    | 889  | -         | -         | -         | -         | 846 |
| 16b  | LASSO  | 1000 | 0    | 0    | 85   | 0    | -         | -         | -         | -         | 0   |
|      | SCAD   | 1000 | 0    | 70   | 17   | 848  | -         | -         | -         | -         | 691 |
|      | MCP    | 1000 | 0    | 18   | 17   | 658  | -         | -         | -         | -         | 760 |
| 17a  | LASSO  | 20   | 5    | 1    | 2    | 3    | -         | -         | -         | -         | 1   |
|      | SCAD   | 22   | 5    | 5    | 2    | 5    | -         | -         | -         | -         | 2   |
|      | MCP    | 23   | 8    | 5    | 1    | 3    | -         | -         | -         | -         | 1   |
| 17b  | LASSO  | 17   | 5    | 4    | 0    | 1    | -         | -         | -         | -         | 1   |
|      | SCAD   | 15   | 5    | 5    | 0    | 1    | -         | -         | -         | -         | 1   |
|      | MCP    | 14   | 5    | 7    | 0    | 1    | -         | -         | -         | -         | 1   |
| 18a  | LASSO  | 996  | 252  | 38   | 625  | 116  | -         | -         | -         | -         | 48  |
|      | SCAD   | 998  | 232  | 346  | 597  | 735  | -         | -         | -         | -         | 768 |
|      | MCP    | 1000 | 232  | 305  | 596  | 676  | -         | -         | -         | -         | 797 |
| 18b  | LASSO  | 1000 | 189  | 27   | 774  | 176  | -         | -         | -         | -         | 31  |
|      | SCAD   | 1000 | 189  | 301  | 774  | 851  | -         | -         | -         | -         | 739 |
|      | MCP    | 1000 | 189  | 264  | 774  | 820  | -         | -         | -         | -         | 795 |
| 19a  | LASSO  | 1000 | 252  | 38   | 627  | 116  | -         | -         | -         | -         | 47  |
|      | SCAD   | 1000 | 231  | 344  | 599  | 737  | -         | -         | -         | -         | 808 |
|      | MCP    | 1000 | 231  | 306  | 597  | 673  | -         | -         | -         | -         | 814 |
| 19b  | LASSO  | 1000 | 188  | 24   | 774  | 173  | -         | -         | -         | -         | 30  |
|      | SCAD   | 1000 | 187  | 300  | 774  | 853  | -         | -         | -         | -         | 777 |
|      | MCP    | 1000 | 187  | 263  | 774  | 823  | -         | -         | -         | -         | 803 |

| Case | Method | Seq  | AIC1 | AIC2 | BIC1 | BIC2 | $L_q$ -A1 | $L_q$ -A2 | $L_q$ -B1 | $L_q$ -B2 | CV  |
|------|--------|------|------|------|------|------|-----------|-----------|-----------|-----------|-----|
| 20a  | LASSO  | 1000 | 441  | 403  | 655  | 469  | -         | -         | -         | -         | 401 |
|      | SCAD   | 1000 | 434  | 689  | 604  | 871  | -         | -         | -         | -         | 862 |
|      | MCP    | 1000 | 434  | 623  | 603  | 796  | -         | -         | -         | -         | 880 |
| 20b  | LASSO  | 1000 | 239  | 242  | 774  | 384  | -         | -         | -         | -         | 238 |
|      | SCAD   | 1000 | 231  | 573  | 774  | 902  | -         | -         | -         | -         | 812 |
|      | MCP    | 1000 | 231  | 491  | 774  | 848  | -         | -         | -         | -         | 835 |
| 21a  | LASSO  | 0    | -    | 0    | -    | 0    | -         | -         | -         | -         | 0   |
|      | SCAD   | 0    | -    | 0    | -    | 0    | -         | -         | -         | -         | 0   |
|      | MCP    | 0    | -    | 0    | -    | 0    | -         | -         | -         | -         | 0   |
| 21b  | LASSO  | 0    | 0    | 0    | 0    | 0    | -         | -         | -         | -         | 0   |
|      | SCAD   | 0    | 0    | 0    | 0    | 0    | -         | -         | -         | -         | 0   |
|      | MCP    | 0    | 0    | 0    | 0    | 0    | -         | -         | -         | -         | 0   |
| 22a  | LASSO  | 0    | -    | 0    | -    | 0    | -         | -         | -         | -         | 0   |
|      | SCAD   | 0    | -    | 0    | -    | 0    | -         | -         | -         | -         | 0   |
|      | MCP    | 0    | -    | 0    | -    | 0    | -         | -         | -         | -         | 0   |
| 22b  | LASSO  | 953  | 0    | 0    | 216  | 0    | -         | -         | -         | -         | 0   |
|      | SCAD   | 989  | 0    | 16   | 79   | 549  | -         | -         | -         | -         | 171 |
|      | MCP    | 1000 | 0    | 5    | 79   | 655  | -         | -         | -         | -         | 542 |
| 23a  | LASSO  | 0    | -    | 0    | -    | 0    | -         | -         | -         | -         | 0   |
|      | SCAD   | 2    | -    | 2    | -    | 2    | -         | -         | -         | -         | 0   |
|      | MCP    | 8    | -    | 8    | -    | 8    | -         | -         | -         | -         | 0   |
| 23b  | LASSO  | 1000 | 0    | 0    | 224  | 0    | -         | -         | -         | -         | 0   |
|      | SCAD   | 1000 | 0    | 17   | 76   | 856  | -         | -         | -         | -         | 706 |
|      | MCP    | 1000 | 0    | 4    | 75   | 654  | -         | -         | -         | -         | 781 |
| 24a  | LASSO  | 0    | -    | 0    | -    | 0    | -         | -         | -         | -         | 0   |
|      | SCAD   | 2    | -    | 2    | -    | 2    | -         | -         | -         | -         | 1   |
|      | MCP    | 4    | -    | 4    | -    | 4    | -         | -         | -         | -         | 0   |
| 24b  | LASSO  | 1000 | 6    | 3    | 226  | 3    | -         | -         | -         | -         | 3   |
|      | SCAD   | 1000 | 16   | 194  | 77   | 873  | -         | -         | -         | -         | 730 |
|      | MCP    | 1000 | 16   | 104  | 77   | 685  | -         | -         | -         | -         | 791 |
| 25a  | LASSO  | 46   | 2    | 8    | 3    | 2    | -         | -         | -         | -         | 3   |
|      | SCAD   | 50   | 4    | 12   | 2    | 5    | -         | -         | -         | -         | 1   |
|      | MCP    | 49   | 3    | 5    | 1    | 2    | -         | -         | -         | -         | 2   |
| 25b  | LASSO  | 53   | 2    | 8    | 0    | 1    | -         | -         | -         | -         | 7   |
|      | SCAD   | 52   | 2    | 10   | 0    | 1    | -         | -         | -         | -         | 5   |
|      | MCP    | 50   | 2    | 12   | 0    | 1    | -         | -         | -         | -         | 3   |
| 26a  | LASSO  | 993  | 488  | 86   | 784  | 199  | -         | -         | -         | -         | 66  |
|      | SCAD   | 1000 | 475  | 527  | 775  | 812  | -         | -         | -         | -         | 796 |
|      | MCP    | 1000 | 475  | 506  | 775  | 798  | -         | -         | -         | -         | 813 |
| 26b  | LASSO  | 1000 | 462  | 79   | 875  | 263  | -         | -         | -         | -         | 63  |
|      | SCAD   | 1000 | 461  | 493  | 875  | 892  | -         | -         | -         | -         | 782 |
|      | MCP    | 1000 | 461  | 479  | 875  | 886  | -         | -         | -         | -         | 803 |
| 27a  | LASSO  | 1000 | 489  | 97   | 788  | 205  | -         | -         | -         | -         | 68  |
|      | SCAD   | 1000 | 475  | 526  | 775  | 813  | -         | -         | -         | -         | 821 |
|      | MCP    | 1000 | 475  | 505  | 775  | 797  | -         | -         | -         | -         | 833 |
| 27b  | LASSO  | 1000 | 461  | 83   | 875  | 263  | -         | -         | -         | -         | 63  |
|      | SCAD   | 1000 | 461  | 492  | 875  | 891  | -         | -         | -         | -         | 802 |
|      | MCP    | 1000 | 461  | 479  | 875  | 886  | -         | -         | -         | -         | 810 |
| 28a  | LASSO  | 1000 | 684  | 648  | 823  | 669  | -         | -         | -         | -         | 648 |
|      | SCAD   | 1000 | 699  | 850  | 787  | 945  | -         | -         | -         | -         | 921 |
|      | MCP    | 1000 | 699  | 813  | 787  | 906  | -         | -         | -         | -         | 938 |
| 28b  | LASSO  | 1000 | 522  | 518  | 875  | 603  | -         | -         | -         | -         | 515 |
|      | SCAD   | 1000 | 531  | 756  | 875  | 935  | -         | -         | -         | -         | 862 |
|      | MCP    | 1000 | 531  | 698  | 875  | 906  | -         | -         | -         | -         | 885 |
| 29a  | LASSO  | 0    | -    | 0    | -    | 0    | -         | -         | -         | -         | 0   |
|      | SCAD   | 0    | -    | 0    | -    | 0    | -         | -         | -         | -         | 0   |
|      | MCP    | 0    | -    | 0    | -    | 0    | -         | -         | -         | -         | 0   |
| 29b  | LASSO  | 0    | 0    | 0    | 0    | 0    | -         | -         | -         | -         | 0   |
|      | SCAD   | 0    | 0    | 0    | 0    | 0    | -         | -         | -         | -         | 0   |
|      | MCP    | 0    | 0    | 0    | 0    | 0    | -         | -         | -         | -         | 0   |

| Case | Method | Seq  | AIC1 | AIC2 | BIC1 | BIC2 | $L_q$ -A1 | $L_q$ -A2 | $L_q$ -B1 | $L_q$ -B2 | CV  |
|------|--------|------|------|------|------|------|-----------|-----------|-----------|-----------|-----|
| 30a  | LASSO  | 0    | -    | 0    | -    | 0    | -         | -         | -         | -         | 0   |
|      | SCAD   | 0    | -    | 0    | -    | 0    | -         | -         | -         | -         | 0   |
|      | MCP    | 0    | -    | 0    | -    | 0    | -         | -         | -         | -         | 0   |
| 30b  | LASSO  | 900  | 4    | 0    | 417  | 0    | -         | -         | -         | -         | 0   |
|      | SCAD   | 985  | 0    | 71   | 265  | 673  | -         | -         | -         | -         | 343 |
|      | MCP    | 999  | 0    | 22   | 266  | 665  | -         | -         | -         | -         | 654 |
| 31a  | LASSO  | 0    | -    | 0    | -    | 0    | -         | -         | -         | -         | 0   |
|      | SCAD   | 0    | -    | 0    | -    | 0    | -         | -         | -         | -         | 0   |
|      | MCP    | 0    | -    | 0    | -    | 0    | -         | -         | -         | -         | 0   |
| 31b  | LASSO  | 994  | 4    | 0    | 449  | 0    | -         | -         | -         | -         | 0   |
|      | SCAD   | 1000 | 0    | 72   | 268  | 842  | -         | -         | -         | -         | 725 |
|      | MCP    | 1000 | 0    | 23   | 267  | 668  | -         | -         | -         | -         | 790 |
| 32a  | LASSO  | 0    | -    | 0    | -    | 0    | -         | -         | -         | -         | 0   |
|      | SCAD   | 0    | -    | 0    | -    | 0    | -         | -         | -         | -         | 0   |
|      | MCP    | 0    | -    | 0    | -    | 0    | -         | -         | -         | -         | 0   |
| 32b  | LASSO  | 995  | 100  | 76   | 466  | 76   | -         | -         | -         | -         | 76  |
|      | SCAD   | 1000 | 185  | 470  | 285  | 892  | -         | -         | -         | -         | 774 |
|      | MCP    | 1000 | 186  | 374  | 285  | 776  | -         | -         | -         | -         | 827 |

Table S24: The results on model selection for  $q = 13/11$  (the  $t$ -error with  $\nu = 10$ ).

| Case | Method | Seq  | AIC1 | AIC2 | BIC1 | BIC2 | $L_q$ -A1 | $L_q$ -A2 | $L_q$ -B1 | $L_q$ -B2 | CV   |
|------|--------|------|------|------|------|------|-----------|-----------|-----------|-----------|------|
| 1a   | LASSO  | 70   | 29   | 16   | 11   | 2    | 0         | 0         | 0         | 0         | 15   |
|      | SCAD   | 69   | 29   | 13   | 11   | 3    | 0         | 0         | 0         | 0         | 11   |
|      | MCP    | 70   | 29   | 17   | 10   | 4    | 0         | 0         | 0         | 0         | 13   |
| 1b   | LASSO  | 71   | 21   | 9    | 2    | 1    | 0         | 0         | 0         | 0         | 9    |
|      | SCAD   | 71   | 21   | 9    | 2    | 2    | 0         | 0         | 0         | 0         | 9    |
|      | MCP    | 72   | 22   | 9    | 2    | 1    | 0         | 0         | 0         | 0         | 11   |
| 2a   | LASSO  | 1000 | 320  | 175  | 796  | 518  | 0         | 0         | 0         | 0         | 147  |
|      | SCAD   | 1000 | 303  | 580  | 782  | 896  | 0         | 0         | 0         | 0         | 638  |
|      | MCP    | 1000 | 303  | 470  | 782  | 869  | 0         | 0         | 0         | 0         | 758  |
| 2b   | LASSO  | 1000 | 290  | 160  | 936  | 717  | 0         | 0         | 0         | 0         | 152  |
|      | SCAD   | 1000 | 299  | 590  | 935  | 941  | 0         | 0         | 0         | 0         | 630  |
|      | MCP    | 1000 | 299  | 495  | 935  | 955  | 0         | 0         | 0         | 0         | 753  |
| 3a   | LASSO  | 1000 | 323  | 169  | 797  | 518  | 0         | 0         | 0         | 0         | 148  |
|      | SCAD   | 1000 | 303  | 581  | 783  | 924  | 0         | 0         | 0         | 0         | 768  |
|      | MCP    | 1000 | 303  | 465  | 783  | 872  | 0         | 0         | 0         | 0         | 808  |
| 3b   | LASSO  | 1000 | 295  | 159  | 936  | 720  | 0         | 0         | 0         | 0         | 150  |
|      | SCAD   | 1000 | 300  | 587  | 936  | 978  | 0         | 0         | 0         | 0         | 736  |
|      | MCP    | 1000 | 300  | 495  | 936  | 961  | 0         | 0         | 0         | 0         | 783  |
| 4a   | LASSO  | 1000 | 323  | 225  | 797  | 534  | 0         | 0         | 0         | 0         | 147  |
|      | SCAD   | 1000 | 304  | 638  | 783  | 929  | 0         | 0         | 0         | 0         | 777  |
|      | MCP    | 1000 | 303  | 495  | 783  | 875  | 0         | 0         | 0         | 0         | 816  |
| 4b   | LASSO  | 1000 | 295  | 218  | 936  | 723  | 0         | 0         | 0         | 0         | 152  |
|      | SCAD   | 1000 | 296  | 631  | 936  | 977  | 0         | 0         | 0         | 0         | 749  |
|      | MCP    | 1000 | 296  | 511  | 936  | 961  | 0         | 0         | 0         | 0         | 797  |
| 5a   | LASSO  | 0    | -    | 0    | -    | 0    | -         | 0         | -         | 0         | 0    |
|      | SCAD   | 0    | -    | 0    | -    | 0    | -         | 0         | -         | 0         | 0    |
|      | MCP    | 0    | -    | 0    | -    | 0    | -         | 0         | -         | 0         | 0    |
| 5b   | LASSO  | 0    | 0    | 0    | 0    | 0    | 0         | 0         | 0         | 0         | 0    |
|      | SCAD   | 0    | 0    | 0    | 0    | 0    | 0         | 0         | 0         | 0         | 0    |
|      | MCP    | 0    | 0    | 0    | 0    | 0    | 0         | 0         | 0         | 0         | 0    |
| 6a   | LASSO  | 17   | -    | 0    | -    | 0    | -         | 0         | -         | 0         | 0    |
|      | SCAD   | 541  | -    | 173  | -    | 382  | -         | 0         | -         | 0         | 61   |
|      | MCP    | 914  | -    | 13   | -    | 588  | -         | 0         | -         | 0         | 333  |
| 6b   | LASSO  | 1000 | 0    | 0    | 658  | 0    | 0         | 0         | 0         | 0         | 0    |
|      | SCAD   | 1000 | 0    | 126  | 585  | 394  | 0         | 0         | 0         | 0         | 17   |
|      | MCP    | 1000 | 0    | 133  | 590  | 792  | 0         | 0         | 0         | 0         | 292  |
| 7a   | LASSO  | 67   | -    | 32   | -    | 32   | -         | 0         | -         | 0         | 32   |
|      | SCAD   | 1000 | -    | 1000 | -    | 1000 | -         | 0         | -         | 0         | 1000 |
|      | MCP    | 1000 | -    | 1000 | -    | 1000 | -         | 0         | -         | 0         | 1000 |
| 7b   | LASSO  | 1000 | 0    | 0    | 657  | 11   | 0         | 0         | 0         | 0         | 0    |
|      | SCAD   | 1000 | 0    | 464  | 590  | 980  | 0         | 0         | 0         | 0         | 694  |
|      | MCP    | 1000 | 0    | 139  | 589  | 939  | 0         | 0         | 0         | 0         | 774  |
| 8a   | LASSO  | 60   | -    | 59   | -    | 59   | -         | 0         | -         | 0         | 59   |
|      | SCAD   | 1000 | -    | 1000 | -    | 1000 | -         | 0         | -         | 0         | 1000 |
|      | MCP    | 1000 | -    | 1000 | -    | 1000 | -         | 0         | -         | 0         | 1000 |
| 8b   | LASSO  | 1000 | 0    | 0    | 660  | 10   | 0         | 0         | 0         | 0         | 0    |
|      | SCAD   | 1000 | 0    | 482  | 590  | 977  | 0         | 0         | 0         | 0         | 697  |
|      | MCP    | 1000 | 0    | 151  | 590  | 940  | 0         | 0         | 0         | 0         | 779  |
| 9a   | LASSO  | 15   | 4    | 1    | 0    | 0    | 0         | 0         | 0         | 0         | 0    |
|      | SCAD   | 17   | 4    | 0    | 0    | 0    | 0         | 0         | 0         | 0         | 3    |
|      | MCP    | 20   | 2    | 4    | 0    | 0    | 0         | 0         | 0         | 0         | 0    |
| 9b   | LASSO  | 13   | 2    | 2    | 0    | 0    | 0         | 0         | 0         | 0         | 3    |
|      | SCAD   | 13   | 2    | 2    | 0    | 0    | 0         | 0         | 0         | 0         | 2    |
|      | MCP    | 14   | 2    | 1    | 0    | 0    | 0         | 0         | 0         | 0         | 2    |

| Case | Method | Seq  | AIC1 | AIC2 | BIC1 | BIC2 | $L_q$ -A1 | $L_q$ -A2 | $L_q$ -B1 | $L_q$ -B2 | CV  |
|------|--------|------|------|------|------|------|-----------|-----------|-----------|-----------|-----|
| 10a  | LASSO  | 999  | 413  | 90   | 821  | 308  | 0         | 0         | 0         | 0         | 50  |
|      | SCAD   | 1000 | 399  | 600  | 808  | 890  | 0         | 0         | 0         | 0         | 637 |
|      | MCP    | 1000 | 399  | 509  | 808  | 884  | 0         | 0         | 0         | 0         | 749 |
| 10b  | LASSO  | 1000 | 396  | 96   | 951  | 541  | 0         | 0         | 0         | 0         | 50  |
|      | SCAD   | 1000 | 390  | 622  | 951  | 937  | 0         | 0         | 0         | 0         | 649 |
|      | MCP    | 1000 | 391  | 543  | 951  | 958  | 0         | 0         | 0         | 0         | 761 |
| 11a  | LASSO  | 1000 | 416  | 97   | 821  | 311  | 0         | 0         | 0         | 0         | 54  |
|      | SCAD   | 1000 | 402  | 597  | 809  | 925  | 0         | 0         | 0         | 0         | 779 |
|      | MCP    | 1000 | 401  | 507  | 808  | 885  | 0         | 0         | 0         | 0         | 796 |
| 11b  | LASSO  | 1000 | 397  | 96   | 952  | 533  | 0         | 0         | 0         | 0         | 53  |
|      | SCAD   | 1000 | 393  | 622  | 952  | 981  | 0         | 0         | 0         | 0         | 749 |
|      | MCP    | 1000 | 393  | 530  | 952  | 967  | 0         | 0         | 0         | 0         | 786 |
| 12a  | LASSO  | 1000 | 428  | 240  | 821  | 402  | 0         | 0         | 0         | 0         | 140 |
|      | SCAD   | 1000 | 409  | 692  | 808  | 946  | 0         | 0         | 0         | 0         | 792 |
|      | MCP    | 1000 | 408  | 576  | 808  | 897  | 0         | 0         | 0         | 0         | 817 |
| 12b  | LASSO  | 1000 | 396  | 185  | 952  | 566  | 0         | 0         | 0         | 0         | 86  |
|      | SCAD   | 1000 | 393  | 679  | 952  | 983  | 0         | 0         | 0         | 0         | 774 |
|      | MCP    | 1000 | 392  | 584  | 952  | 968  | 0         | 0         | 0         | 0         | 806 |
| 13a  | LASSO  | 0    | -    | 0    | -    | 0    | -         | 0         | -         | 0         | 0   |
|      | SCAD   | 0    | -    | 0    | -    | 0    | -         | 0         | -         | 0         | 0   |
|      | MCP    | 0    | -    | 0    | -    | 0    | -         | 0         | -         | 0         | 0   |
| 13b  | LASSO  | 0    | 0    | 0    | 0    | 0    | 0         | 0         | 0         | 0         | 0   |
|      | SCAD   | 0    | 0    | 0    | 0    | 0    | 0         | 0         | 0         | 0         | 0   |
|      | MCP    | 0    | 0    | 0    | 0    | 0    | 0         | 0         | 0         | 0         | 0   |
| 14a  | LASSO  | 0    | -    | 0    | -    | 0    | -         | 0         | -         | 0         | 0   |
|      | SCAD   | 55   | -    | 48   | -    | 55   | -         | 0         | -         | 0         | 2   |
|      | MCP    | 177  | -    | 23   | -    | 135  | -         | 0         | -         | 0         | 2   |
| 14b  | LASSO  | 983  | 1    | 0    | 774  | 0    | 0         | 0         | 0         | 0         | 0   |
|      | SCAD   | 992  | 0    | 122  | 651  | 337  | 0         | 0         | 0         | 0         | 16  |
|      | MCP    | 999  | 0    | 143  | 649  | 769  | 0         | 0         | 0         | 0         | 254 |
| 15a  | LASSO  | 0    | -    | 0    | -    | 0    | -         | 0         | -         | 0         | 0   |
|      | SCAD   | 822  | -    | 822  | -    | 822  | -         | 0         | -         | 0         | 727 |
|      | MCP    | 897  | -    | 897  | -    | 897  | -         | 0         | -         | 0         | 833 |
| 15b  | LASSO  | 1000 | 1    | 0    | 786  | 0    | 0         | 0         | 0         | 0         | 0   |
|      | SCAD   | 1000 | 0    | 433  | 653  | 981  | 0         | 0         | 0         | 0         | 700 |
|      | MCP    | 1000 | 0    | 154  | 653  | 940  | 0         | 0         | 0         | 0         | 761 |
| 16a  | LASSO  | 0    | -    | 0    | -    | 0    | -         | 0         | -         | 0         | 0   |
|      | SCAD   | 823  | -    | 823  | -    | 823  | -         | 0         | -         | 0         | 713 |
|      | MCP    | 886  | -    | 886  | -    | 886  | -         | 0         | -         | 0         | 834 |
| 16b  | LASSO  | 1000 | 2    | 0    | 784  | 0    | 0         | 0         | 0         | 0         | 0   |
|      | SCAD   | 1000 | 0    | 474  | 651  | 981  | 0         | 0         | 0         | 0         | 709 |
|      | MCP    | 1000 | 0    | 194  | 651  | 944  | 0         | 0         | 0         | 0         | 771 |
| 17a  | LASSO  | 14   | 1    | 1    | 0    | 1    | 0         | 0         | 0         | 0         | 3   |
|      | SCAD   | 16   | 1    | 1    | 0    | 1    | 0         | 0         | 0         | 0         | 0   |
|      | MCP    | 17   | 1    | 3    | 0    | 0    | 0         | 0         | 0         | 0         | 2   |
| 17b  | LASSO  | 14   | 0    | 1    | 0    | 0    | 0         | 0         | 0         | 0         | 2   |
|      | SCAD   | 14   | 0    | 1    | 0    | 0    | 0         | 0         | 0         | 0         | 1   |
|      | MCP    | 15   | 0    | 1    | 0    | 0    | 0         | 0         | 0         | 0         | 1   |
| 18a  | LASSO  | 997  | 552  | 82   | 877  | 242  | 0         | 0         | 0         | 0         | 37  |
|      | SCAD   | 998  | 529  | 649  | 873  | 895  | 0         | 0         | 0         | 0         | 694 |
|      | MCP    | 1000 | 530  | 591  | 873  | 901  | 0         | 0         | 0         | 0         | 767 |
| 18b  | LASSO  | 1000 | 529  | 84   | 965  | 402  | 0         | 0         | 0         | 0         | 37  |
|      | SCAD   | 1000 | 529  | 662  | 965  | 952  | 0         | 0         | 0         | 0         | 695 |
|      | MCP    | 1000 | 529  | 618  | 965  | 969  | 0         | 0         | 0         | 0         | 772 |
| 19a  | LASSO  | 1000 | 552  | 83   | 878  | 247  | 0         | 0         | 0         | 0         | 37  |
|      | SCAD   | 1000 | 529  | 655  | 874  | 921  | 0         | 0         | 0         | 0         | 785 |
|      | MCP    | 1000 | 529  | 594  | 874  | 902  | 0         | 0         | 0         | 0         | 798 |
| 19b  | LASSO  | 1000 | 528  | 86   | 965  | 398  | 0         | 0         | 0         | 0         | 38  |
|      | SCAD   | 1000 | 529  | 662  | 965  | 981  | 0         | 0         | 0         | 0         | 771 |
|      | MCP    | 1000 | 529  | 613  | 965  | 975  | 0         | 0         | 0         | 0         | 793 |

| Case | Method | Seq  | AIC1 | AIC2 | BIC1 | BIC2 | $L_q$ -A1 | $L_q$ -A2 | $L_q$ -B1 | $L_q$ -B2 | CV  |
|------|--------|------|------|------|------|------|-----------|-----------|-----------|-----------|-----|
| 20a  | LASSO  | 1000 | 576  | 361  | 879  | 461  | 0         | 0         | 0         | 0         | 304 |
|      | SCAD   | 1000 | 535  | 783  | 873  | 953  | 0         | 0         | 0         | 0         | 835 |
|      | MCP    | 1000 | 536  | 699  | 873  | 921  | 0         | 0         | 0         | 0         | 852 |
| 20b  | LASSO  | 1000 | 528  | 272  | 965  | 508  | 0         | 0         | 0         | 0         | 199 |
|      | SCAD   | 1000 | 530  | 744  | 965  | 984  | 0         | 0         | 0         | 0         | 804 |
|      | MCP    | 1000 | 530  | 661  | 965  | 975  | 0         | 0         | 0         | 0         | 827 |
| 21a  | LASSO  | 0    | -    | 0    | -    | 0    | -         | 0         | -         | 0         | 0   |
|      | SCAD   | 0    | -    | 0    | -    | 0    | -         | 0         | -         | 0         | 0   |
|      | MCP    | 0    | -    | 0    | -    | 0    | -         | 0         | -         | 0         | 0   |
| 21b  | LASSO  | 0    | 0    | 0    | 0    | 0    | 0         | 0         | 0         | 0         | 0   |
|      | SCAD   | 0    | 0    | 0    | 0    | 0    | 0         | 0         | 0         | 0         | 0   |
|      | MCP    | 0    | 0    | 0    | 0    | 0    | 0         | 0         | 0         | 0         | 0   |
| 22a  | LASSO  | 0    | -    | 0    | -    | 0    | -         | 0         | -         | 0         | 0   |
|      | SCAD   | 0    | -    | 0    | -    | 0    | -         | 0         | -         | 0         | 0   |
|      | MCP    | 0    | -    | 0    | -    | 0    | -         | 0         | -         | 0         | 0   |
| 22b  | LASSO  | 920  | 26   | 0    | 768  | 0    | 0         | 0         | 0         | 0         | 0   |
|      | SCAD   | 964  | 3    | 206  | 711  | 420  | 0         | 0         | 0         | 0         | 46  |
|      | MCP    | 998  | 3    | 205  | 720  | 792  | 0         | 0         | 0         | 0         | 335 |
| 23a  | LASSO  | 0    | -    | 0    | -    | 0    | -         | 0         | -         | 0         | 0   |
|      | SCAD   | 1    | -    | 1    | -    | 1    | -         | 0         | -         | 0         | 0   |
|      | MCP    | 7    | -    | 7    | -    | 7    | -         | 0         | -         | 0         | 2   |
| 23b  | LASSO  | 999  | 30   | 0    | 837  | 0    | 0         | 0         | 0         | 0         | 0   |
|      | SCAD   | 1000 | 3    | 451  | 724  | 980  | 0         | 0         | 0         | 0         | 709 |
|      | MCP    | 1000 | 3    | 212  | 724  | 947  | 0         | 0         | 0         | 0         | 744 |
| 24a  | LASSO  | 0    | -    | 0    | -    | 0    | -         | 0         | -         | 0         | 0   |
|      | SCAD   | 1    | -    | 1    | -    | 1    | -         | 0         | -         | 0         | 0   |
|      | MCP    | 8    | -    | 8    | -    | 8    | -         | 0         | -         | 0         | 0   |
| 24b  | LASSO  | 999  | 35   | 0    | 838  | 0    | 0         | 0         | 0         | 0         | 0   |
|      | SCAD   | 1000 | 11   | 527  | 725  | 982  | 0         | 0         | 0         | 0         | 726 |
|      | MCP    | 1000 | 10   | 303  | 724  | 945  | 0         | 0         | 0         | 0         | 754 |
| 25a  | LASSO  | 38   | 0    | 3    | 0    | 0    | 0         | 0         | 0         | 0         | 3   |
|      | SCAD   | 48   | 0    | 2    | 0    | 0    | 0         | 0         | 0         | 0         | 1   |
|      | MCP    | 49   | 0    | 2    | 0    | 0    | 0         | 0         | 0         | 0         | 1   |
| 25b  | LASSO  | 32   | 0    | 1    | 0    | 0    | 0         | 0         | 0         | 0         | 3   |
|      | SCAD   | 32   | 0    | 1    | 0    | 0    | 0         | 0         | 0         | 0         | 4   |
|      | MCP    | 32   | 0    | 0    | 0    | 0    | 0         | 0         | 0         | 0         | 1   |
| 26a  | LASSO  | 998  | 724  | 168  | 939  | 320  | 0         | 0         | 0         | 0         | 79  |
|      | SCAD   | 998  | 717  | 753  | 939  | 939  | 0         | 0         | 0         | 0         | 772 |
|      | MCP    | 999  | 717  | 742  | 939  | 944  | 0         | 0         | 0         | 0         | 792 |
| 26b  | LASSO  | 1000 | 723  | 163  | 982  | 445  | 0         | 0         | 0         | 0         | 62  |
|      | SCAD   | 1000 | 724  | 760  | 982  | 963  | 0         | 0         | 0         | 0         | 764 |
|      | MCP    | 1000 | 724  | 743  | 982  | 977  | 0         | 0         | 0         | 0         | 806 |
| 27a  | LASSO  | 1000 | 724  | 168  | 939  | 324  | 0         | 0         | 0         | 0         | 78  |
|      | SCAD   | 1000 | 716  | 756  | 939  | 953  | 0         | 0         | 0         | 0         | 819 |
|      | MCP    | 1000 | 716  | 739  | 939  | 944  | 0         | 0         | 0         | 0         | 823 |
| 27b  | LASSO  | 1000 | 724  | 166  | 982  | 442  | 0         | 0         | 0         | 0         | 61  |
|      | SCAD   | 1000 | 724  | 760  | 982  | 985  | 0         | 0         | 0         | 0         | 794 |
|      | MCP    | 1000 | 724  | 743  | 982  | 984  | 0         | 0         | 0         | 0         | 819 |
| 28a  | LASSO  | 1000 | 768  | 601  | 940  | 657  | 0         | 0         | 0         | 0         | 582 |
|      | SCAD   | 1000 | 738  | 901  | 939  | 975  | 0         | 0         | 0         | 0         | 905 |
|      | MCP    | 1000 | 738  | 859  | 939  | 959  | 0         | 0         | 0         | 0         | 921 |
| 28b  | LASSO  | 1000 | 726  | 515  | 982  | 650  | 0         | 0         | 0         | 0         | 463 |
|      | SCAD   | 1000 | 726  | 860  | 982  | 988  | 0         | 0         | 0         | 0         | 866 |
|      | MCP    | 1000 | 726  | 816  | 982  | 984  | 0         | 0         | 0         | 0         | 892 |
| 29a  | LASSO  | 0    | -    | 0    | -    | 0    | -         | 0         | -         | 0         | 0   |
|      | SCAD   | 0    | -    | 0    | -    | 0    | -         | 0         | -         | 0         | 0   |
|      | MCP    | 0    | -    | 0    | -    | 0    | -         | 0         | -         | 0         | 0   |
| 29b  | LASSO  | 0    | 0    | 0    | 0    | 0    | 0         | 0         | 0         | 0         | 0   |
|      | SCAD   | 0    | 0    | 0    | 0    | 0    | 0         | 0         | 0         | 0         | 0   |
|      | MCP    | 0    | 0    | 0    | 0    | 0    | 0         | 0         | 0         | 0         | 0   |



| Case | Method | Seq  | AIC1 | AIC2 | BIC1 | BIC2 | $L_q$ -A1 | $L_q$ -A2 | $L_q$ -B1 | $L_q$ -B2 | CV  |
|------|--------|------|------|------|------|------|-----------|-----------|-----------|-----------|-----|
| 30a  | LASSO  | 0    | -    | 0    | -    | 0    | -         | 0         | -         | 0         | 0   |
|      | SCAD   | 0    | -    | 0    | -    | 0    | -         | 0         | -         | 0         | 0   |
|      | MCP    | 0    | -    | 0    | -    | 0    | -         | 0         | -         | 0         | 0   |
| 30b  | LASSO  | 849  | 124  | 0    | 785  | 0    | 0         | 0         | 0         | 0         | 0   |
|      | SCAD   | 962  | 47   | 357  | 838  | 607  | 0         | 0         | 0         | 0         | 155 |
|      | MCP    | 997  | 46   | 297  | 846  | 873  | 0         | 0         | 0         | 0         | 482 |
| 31a  | LASSO  | 0    | -    | 0    | -    | 0    | -         | 0         | -         | 0         | 0   |
|      | SCAD   | 0    | -    | 0    | -    | 0    | -         | 0         | -         | 0         | 0   |
|      | MCP    | 0    | -    | 0    | -    | 0    | -         | 0         | -         | 0         | 0   |
| 31b  | LASSO  | 990  | 138  | 0    | 893  | 0    | 0         | 0         | 0         | 0         | 0   |
|      | SCAD   | 1000 | 52   | 492  | 845  | 984  | 0         | 0         | 0         | 0         | 738 |
|      | MCP    | 1000 | 50   | 304  | 845  | 956  | 0         | 0         | 0         | 0         | 778 |
| 32a  | LASSO  | 0    | -    | 0    | -    | 0    | -         | 0         | -         | 0         | 0   |
|      | SCAD   | 0    | -    | 0    | -    | 0    | -         | 0         | -         | 0         | 0   |
|      | MCP    | 0    | -    | 0    | -    | 0    | -         | 0         | -         | 0         | 0   |
| 32b  | LASSO  | 990  | 179  | 32   | 894  | 32   | 0         | 0         | 0         | 0         | 32  |
|      | SCAD   | 1000 | 117  | 672  | 845  | 984  | 0         | 0         | 0         | 0         | 764 |
|      | MCP    | 1000 | 117  | 496  | 845  | 961  | 0         | 0         | 0         | 0         | 795 |

Table S25: The results on model selection for  $q = 3/2$  (the  $t$ -error with  $\nu = 3$ ).

| Case | Method | Seq  | AIC1 | AIC2 | BIC1 | BIC2 | $L_q$ -A1 | $L_q$ -A2 | $L_q$ -B1 | $L_q$ -B2 | CV   |
|------|--------|------|------|------|------|------|-----------|-----------|-----------|-----------|------|
| 1a   | LASSO  | 45   | 13   | 13   | 5    | 4    | 3         | 4         | 1         | 0         | 5    |
|      | SCAD   | 44   | 13   | 12   | 5    | 5    | 3         | 4         | 1         | 0         | 8    |
|      | MCP    | 40   | 12   | 16   | 5    | 5    | 3         | 6         | 1         | 0         | 7    |
| 1b   | LASSO  | 34   | 7    | 5    | 1    | 0    | 6         | 1         | 0         | 0         | 4    |
|      | SCAD   | 34   | 8    | 4    | 1    | 0    | 6         | 2         | 0         | 0         | 2    |
|      | MCP    | 34   | 8    | 6    | 1    | 0    | 6         | 2         | 0         | 0         | 2    |
| 2a   | LASSO  | 983  | 556  | 143  | 848  | 405  | 702       | 495       | 946       | 794       | 133  |
|      | SCAD   | 983  | 544  | 459  | 845  | 651  | 697       | 681       | 947       | 845       | 344  |
|      | MCP    | 985  | 545  | 509  | 845  | 783  | 693       | 761       | 945       | 920       | 562  |
| 2b   | LASSO  | 995  | 653  | 109  | 955  | 545  | 631       | 429       | 971       | 895       | 139  |
|      | SCAD   | 995  | 649  | 432  | 955  | 686  | 630       | 640       | 971       | 896       | 254  |
|      | MCP    | 995  | 650  | 529  | 956  | 846  | 630       | 731       | 971       | 954       | 529  |
| 3a   | LASSO  | 1000 | 572  | 139  | 866  | 412  | 703       | 498       | 952       | 802       | 133  |
|      | SCAD   | 1000 | 560  | 672  | 858  | 942  | 694       | 855       | 948       | 972       | 783  |
|      | MCP    | 1000 | 560  | 600  | 858  | 908  | 694       | 794       | 948       | 965       | 794  |
| 3b   | LASSO  | 1000 | 661  | 106  | 959  | 541  | 631       | 432       | 994       | 907       | 139  |
|      | SCAD   | 1000 | 651  | 703  | 960  | 986  | 631       | 855       | 994       | 997       | 747  |
|      | MCP    | 1000 | 651  | 643  | 960  | 975  | 631       | 786       | 994       | 996       | 786  |
| 4a   | LASSO  | 1000 | 573  | 155  | 865  | 413  | 704       | 496       | 951       | 800       | 138  |
|      | SCAD   | 1000 | 558  | 681  | 859  | 936  | 693       | 859       | 948       | 971       | 782  |
|      | MCP    | 1000 | 558  | 596  | 859  | 904  | 693       | 792       | 948       | 965       | 801  |
| 4b   | LASSO  | 1000 | 652  | 104  | 960  | 543  | 631       | 431       | 994       | 908       | 134  |
|      | SCAD   | 1000 | 652  | 700  | 960  | 984  | 630       | 856       | 994       | 998       | 755  |
|      | MCP    | 1000 | 653  | 632  | 960  | 974  | 630       | 783       | 994       | 996       | 798  |
| 5a   | LASSO  | 0    | -    | 0    | -    | 0    | -         | 0         | -         | 0         | 0    |
|      | SCAD   | 0    | -    | 0    | -    | 0    | -         | 0         | -         | 0         | 0    |
|      | MCP    | 0    | -    | 0    | -    | 0    | -         | 0         | -         | 0         | 0    |
| 5b   | LASSO  | 0    | 0    | 0    | 0    | 0    | 0         | 0         | 0         | 0         | 0    |
|      | SCAD   | 0    | 0    | 0    | 0    | 0    | 0         | 0         | 0         | 0         | 0    |
|      | MCP    | 0    | 0    | 0    | 0    | 0    | 0         | 0         | 0         | 0         | 0    |
| 6a   | LASSO  | 4    | -    | 0    | -    | 0    | -         | 0         | -         | 0         | 0    |
|      | SCAD   | 59   | -    | 11   | -    | 31   | -         | 40        | -         | 51        | 2    |
|      | MCP    | 325  | -    | 1    | -    | 123  | -         | 200       | -         | 264       | 29   |
| 6b   | LASSO  | 822  | 330  | 0    | 735  | 0    | 85        | 0         | 718       | 80        | 0    |
|      | SCAD   | 826  | 325  | 0    | 726  | 8    | 49        | 10        | 719       | 86        | 0    |
|      | MCP    | 880  | 347  | 10   | 762  | 105  | 37        | 120       | 738       | 392       | 8    |
| 7a   | LASSO  | 48   | -    | 16   | -    | 16   | -         | 16        | -         | 16        | 16   |
|      | SCAD   | 1000 | -    | 990  | -    | 997  | -         | 990       | -         | 994       | 994  |
|      | MCP    | 1000 | -    | 988  | -    | 994  | -         | 989       | -         | 990       | 999  |
| 7b   | LASSO  | 1000 | 432  | 0    | 883  | 1    | 82        | 1         | 963       | 84        | 0    |
|      | SCAD   | 1000 | 410  | 553  | 854  | 978  | 37        | 846       | 958       | 994       | 686  |
|      | MCP    | 1000 | 412  | 361  | 853  | 948  | 37        | 671       | 958       | 989       | 736  |
| 8a   | LASSO  | 42   | -    | 41   | -    | 41   | -         | 41        | -         | 41        | 41   |
|      | SCAD   | 1000 | -    | 1000 | -    | 1000 | -         | 1000      | -         | 1000      | 1000 |
|      | MCP    | 1000 | -    | 1000 | -    | 1000 | -         | 1000      | -         | 1000      | 1000 |
| 8b   | LASSO  | 1000 | 432  | 0    | 884  | 1    | 82        | 1         | 963       | 78        | 0    |
|      | SCAD   | 1000 | 407  | 559  | 860  | 980  | 38        | 839       | 958       | 995       | 695  |
|      | MCP    | 1000 | 406  | 363  | 860  | 953  | 38        | 666       | 958       | 989       | 741  |
| 9a   | LASSO  | 12   | 1    | 0    | 0    | 0    | 0         | 0         | 0         | 0         | 0    |
|      | SCAD   | 9    | 1    | 0    | 0    | 0    | 0         | 0         | 0         | 0         | 1    |
|      | MCP    | 10   | 1    | 0    | 0    | 0    | 0         | 0         | 0         | 0         | 0    |
| 9b   | LASSO  | 6    | 1    | 0    | 0    | 0    | 0         | 0         | 0         | 0         | 0    |
|      | SCAD   | 5    | 1    | 0    | 0    | 0    | 0         | 0         | 0         | 0         | 1    |
|      | MCP    | 5    | 1    | 0    | 0    | 0    | 0         | 0         | 0         | 0         | 0    |

| Case | Method | Seq  | AIC1 | AIC2 | BIC1 | BIC2 | $L_q$ -A1 | $L_q$ -A2 | $L_q$ -B1 | $L_q$ -B2 | CV  |
|------|--------|------|------|------|------|------|-----------|-----------|-----------|-----------|-----|
| 10a  | LASSO  | 965  | 574  | 56   | 868  | 220  | 753       | 291       | 943       | 617       | 44  |
|      | SCAD   | 965  | 559  | 446  | 853  | 614  | 740       | 662       | 941       | 775       | 322 |
|      | MCP    | 972  | 560  | 497  | 854  | 747  | 739       | 763       | 947       | 908       | 512 |
| 10b  | LASSO  | 997  | 680  | 54   | 967  | 320  | 707       | 257       | 945       | 781       | 51  |
|      | SCAD   | 997  | 677  | 393  | 966  | 631  | 705       | 640       | 945       | 861       | 245 |
|      | MCP    | 997  | 676  | 519  | 966  | 818  | 704       | 746       | 945       | 941       | 481 |
| 11a  | LASSO  | 1000 | 602  | 53   | 897  | 220  | 752       | 293       | 958       | 618       | 41  |
|      | SCAD   | 1000 | 589  | 658  | 880  | 948  | 737       | 859       | 957       | 971       | 791 |
|      | MCP    | 1000 | 588  | 602  | 879  | 918  | 737       | 817       | 957       | 969       | 814 |
| 11b  | LASSO  | 1000 | 683  | 56   | 970  | 326  | 708       | 255       | 996       | 779       | 54  |
|      | SCAD   | 1000 | 684  | 725  | 969  | 984  | 704       | 877       | 996       | 998       | 782 |
|      | MCP    | 1000 | 684  | 673  | 969  | 978  | 704       | 818       | 996       | 997       | 801 |
| 12a  | LASSO  | 1000 | 607  | 94   | 898  | 251  | 754       | 320       | 958       | 621       | 57  |
|      | SCAD   | 1000 | 592  | 685  | 878  | 949  | 737       | 864       | 957       | 971       | 794 |
|      | MCP    | 1000 | 594  | 627  | 878  | 916  | 737       | 816       | 957       | 969       | 824 |
| 12b  | LASSO  | 1000 | 680  | 69   | 970  | 325  | 708       | 273       | 996       | 778       | 53  |
|      | SCAD   | 1000 | 682  | 727  | 969  | 984  | 704       | 876       | 996       | 998       | 794 |
|      | MCP    | 1000 | 683  | 674  | 969  | 977  | 704       | 816       | 996       | 997       | 825 |
| 13a  | LASSO  | 0    | -    | 0    | -    | 0    | -         | 0         | -         | 0         | 0   |
|      | SCAD   | 0    | -    | 0    | -    | 0    | -         | 0         | -         | 0         | 0   |
|      | MCP    | 0    | -    | 0    | -    | 0    | -         | 0         | -         | 0         | 0   |
| 13b  | LASSO  | 0    | 0    | 0    | 0    | 0    | 0         | 0         | 0         | 0         | 0   |
|      | SCAD   | 0    | 0    | 0    | 0    | 0    | 0         | 0         | 0         | 0         | 0   |
|      | MCP    | 0    | 0    | 0    | 0    | 0    | 0         | 0         | 0         | 0         | 0   |
| 14a  | LASSO  | 0    | -    | 0    | -    | 0    | -         | 0         | -         | 0         | 0   |
|      | SCAD   | 4    | -    | 2    | -    | 4    | -         | 4         | -         | 3         | 0   |
|      | MCP    | 19   | -    | 0    | -    | 9    | -         | 17        | -         | 19        | 0   |
| 14b  | LASSO  | 588  | 230  | 0    | 539  | 0    | 165       | 0         | 492       | 14        | 0   |
|      | SCAD   | 619  | 217  | 0    | 543  | 4    | 78        | 6         | 513       | 33        | 0   |
|      | MCP    | 774  | 265  | 7    | 651  | 56   | 71        | 93        | 588       | 276       | 5   |
| 15a  | LASSO  | 0    | -    | 0    | -    | 0    | -         | 0         | -         | 0         | 0   |
|      | SCAD   | 817  | -    | 816  | -    | 816  | -         | 816       | -         | 816       | 725 |
|      | MCP    | 888  | -    | 887  | -    | 887  | -         | 887       | -         | 887       | 828 |
| 15b  | LASSO  | 1000 | 408  | 0    | 899  | 0    | 191       | 0         | 968       | 18        | 0   |
|      | SCAD   | 1000 | 393  | 532  | 849  | 977  | 66        | 833       | 958       | 993       | 682 |
|      | MCP    | 1000 | 390  | 352  | 848  | 939  | 66        | 646       | 958       | 989       | 736 |
| 16a  | LASSO  | 0    | -    | 0    | -    | 0    | -         | 0         | -         | 0         | 0   |
|      | SCAD   | 822  | -    | 822  | -    | 822  | -         | 822       | -         | 822       | 734 |
|      | MCP    | 889  | -    | 889  | -    | 889  | -         | 889       | -         | 889       | 832 |
| 16b  | LASSO  | 1000 | 410  | 0    | 896  | 0    | 196       | 0         | 967       | 14        | 0   |
|      | SCAD   | 1000 | 395  | 541  | 852  | 976  | 68        | 835       | 958       | 993       | 688 |
|      | MCP    | 1000 | 392  | 360  | 851  | 939  | 68        | 658       | 958       | 988       | 744 |
| 17a  | LASSO  | 11   | 0    | 0    | 0    | 0    | 0         | 0         | 0         | 0         | 0   |
|      | SCAD   | 12   | 0    | 0    | 0    | 0    | 0         | 0         | 0         | 0         | 2   |
|      | MCP    | 13   | 0    | 1    | 0    | 0    | 0         | 0         | 0         | 0         | 0   |
| 17b  | LASSO  | 7    | 1    | 0    | 0    | 0    | 0         | 0         | 0         | 0         | 1   |
|      | SCAD   | 9    | 2    | 0    | 0    | 0    | 0         | 0         | 0         | 0         | 0   |
|      | MCP    | 9    | 2    | 0    | 0    | 0    | 0         | 0         | 0         | 0         | 1   |
| 18a  | LASSO  | 956  | 645  | 60   | 890  | 177  | 828       | 255       | 936       | 531       | 32  |
|      | SCAD   | 960  | 638  | 512  | 876  | 654  | 816       | 714       | 941       | 806       | 405 |
|      | MCP    | 967  | 639  | 577  | 878  | 765  | 817       | 809       | 947       | 912       | 585 |
| 18b  | LASSO  | 997  | 734  | 60   | 978  | 265  | 794       | 223       | 921       | 675       | 35  |
|      | SCAD   | 997  | 731  | 466  | 978  | 636  | 793       | 684       | 921       | 854       | 316 |
|      | MCP    | 996  | 732  | 561  | 977  | 812  | 793       | 786       | 919       | 941       | 524 |
| 19a  | LASSO  | 1000 | 679  | 64   | 926  | 180  | 837       | 259       | 973       | 527       | 35  |
|      | SCAD   | 1000 | 664  | 714  | 909  | 953  | 819       | 900       | 973       | 977       | 805 |
|      | MCP    | 1000 | 664  | 683  | 908  | 928  | 819       | 868       | 973       | 976       | 829 |
| 19b  | LASSO  | 1000 | 737  | 58   | 981  | 257  | 795       | 221       | 996       | 677       | 36  |
|      | SCAD   | 1000 | 735  | 764  | 981  | 985  | 793       | 885       | 996       | 998       | 794 |
|      | MCP    | 1000 | 736  | 720  | 981  | 982  | 793       | 854       | 996       | 997       | 801 |

| Case | Method | Seq  | AIC1 | AIC2 | BIC1 | BIC2 | $L_q$ -A1 | $L_q$ -A2 | $L_q$ -B1 | $L_q$ -B2 | CV  |
|------|--------|------|------|------|------|------|-----------|-----------|-----------|-----------|-----|
| 20a  | LASSO  | 1000 | 691  | 191  | 926  | 286  | 837       | 336       | 973       | 557       | 129 |
|      | SCAD   | 1000 | 673  | 760  | 909  | 960  | 819       | 905       | 973       | 977       | 836 |
|      | MCP    | 1000 | 673  | 711  | 908  | 931  | 819       | 869       | 973       | 976       | 860 |
| 20b  | LASSO  | 1000 | 738  | 109  | 981  | 296  | 794       | 264       | 996       | 690       | 62  |
|      | SCAD   | 1000 | 737  | 773  | 981  | 985  | 794       | 885       | 996       | 998       | 812 |
|      | MCP    | 1000 | 738  | 732  | 981  | 982  | 794       | 855       | 996       | 997       | 834 |
| 21a  | LASSO  | 0    | -    | 0    | -    | 0    | -         | 0         | -         | 0         | 0   |
|      | SCAD   | 0    | -    | 0    | -    | 0    | -         | 0         | -         | 0         | 0   |
|      | MCP    | 0    | -    | 0    | -    | 0    | -         | 0         | -         | 0         | 0   |
| 21b  | LASSO  | 0    | 0    | 0    | 0    | 0    | 0         | 0         | 0         | 0         | 0   |
|      | SCAD   | 0    | 0    | 0    | 0    | 0    | 0         | 0         | 0         | 0         | 0   |
|      | MCP    | 0    | 0    | 0    | 0    | 0    | 0         | 0         | 0         | 0         | 0   |
| 22a  | LASSO  | 0    | -    | 0    | -    | 0    | -         | 0         | -         | 0         | 0   |
|      | SCAD   | 0    | -    | 0    | -    | 0    | -         | 0         | -         | 0         | 0   |
|      | MCP    | 0    | -    | 0    | -    | 0    | -         | 0         | -         | 0         | 0   |
| 22b  | LASSO  | 409  | 177  | 0    | 376  | 0    | 201       | 0         | 337       | 2         | 0   |
|      | SCAD   | 467  | 187  | 0    | 421  | 5    | 147       | 11        | 367       | 45        | 0   |
|      | MCP    | 683  | 265  | 12   | 605  | 57   | 147       | 101       | 440       | 284       | 4   |
| 23a  | LASSO  | 0    | -    | 0    | -    | 0    | -         | 0         | -         | 0         | 0   |
|      | SCAD   | 0    | -    | 0    | -    | 0    | -         | 0         | -         | 0         | 0   |
|      | MCP    | 7    | -    | 7    | -    | 7    | -         | 7         | -         | 7         | 0   |
| 23b  | LASSO  | 999  | 428  | 0    | 909  | 0    | 310       | 0         | 975       | 3         | 0   |
|      | SCAD   | 1000 | 405  | 546  | 861  | 975  | 143       | 838       | 969       | 994       | 702 |
|      | MCP    | 1000 | 404  | 387  | 861  | 949  | 143       | 676       | 969       | 984       | 756 |
| 24a  | LASSO  | 0    | -    | 0    | -    | 0    | -         | 0         | -         | 0         | 0   |
|      | SCAD   | 1    | -    | 1    | -    | 1    | -         | 1         | -         | 1         | 0   |
|      | MCP    | 4    | -    | 4    | -    | 4    | -         | 4         | -         | 4         | 1   |
| 24b  | LASSO  | 999  | 432  | 0    | 910  | 0    | 306       | 0         | 975       | 3         | 0   |
|      | SCAD   | 1000 | 410  | 561  | 859  | 978  | 143       | 838       | 969       | 994       | 710 |
|      | MCP    | 1000 | 407  | 416  | 859  | 947  | 143       | 694       | 969       | 985       | 764 |
| 25a  | LASSO  | 28   | 0    | 2    | 0    | 0    | 0         | 0         | 0         | 0         | 2   |
|      | SCAD   | 26   | 0    | 1    | 0    | 0    | 0         | 0         | 0         | 0         | 0   |
|      | MCP    | 28   | 0    | 1    | 0    | 0    | 0         | 0         | 0         | 0         | 0   |
| 25b  | LASSO  | 29   | 0    | 0    | 0    | 0    | 0         | 0         | 0         | 0         | 1   |
|      | SCAD   | 26   | 0    | 0    | 0    | 0    | 0         | 0         | 0         | 0         | 0   |
|      | MCP    | 24   | 0    | 0    | 0    | 0    | 0         | 0         | 0         | 0         | 0   |
| 26a  | LASSO  | 949  | 735  | 130  | 891  | 240  | 864       | 289       | 924       | 530       | 76  |
|      | SCAD   | 960  | 739  | 619  | 902  | 735  | 874       | 798       | 933       | 853       | 547 |
|      | MCP    | 967  | 745  | 673  | 908  | 823  | 878       | 861       | 933       | 925       | 649 |
| 26b  | LASSO  | 998  | 810  | 121  | 990  | 325  | 895       | 299       | 905       | 654       | 71  |
|      | SCAD   | 998  | 810  | 615  | 990  | 761  | 895       | 788       | 905       | 893       | 512 |
|      | MCP    | 997  | 809  | 689  | 989  | 875  | 895       | 865       | 903       | 964       | 651 |
| 27a  | LASSO  | 998  | 778  | 135  | 937  | 242  | 883       | 292       | 977       | 532       | 76  |
|      | SCAD   | 1000 | 773  | 771  | 940  | 945  | 880       | 902       | 978       | 979       | 804 |
|      | MCP    | 1000 | 773  | 758  | 940  | 938  | 880       | 887       | 978       | 978       | 819 |
| 27b  | LASSO  | 1000 | 814  | 123  | 992  | 329  | 895       | 298       | 999       | 657       | 72  |
|      | SCAD   | 1000 | 812  | 817  | 992  | 991  | 895       | 913       | 999       | 999       | 808 |
|      | MCP    | 1000 | 812  | 805  | 992  | 991  | 895       | 903       | 999       | 999       | 818 |
| 28a  | LASSO  | 999  | 796  | 385  | 939  | 445  | 883       | 494       | 978       | 635       | 352 |
|      | SCAD   | 1000 | 795  | 840  | 940  | 957  | 880       | 910       | 978       | 979       | 872 |
|      | MCP    | 1000 | 795  | 811  | 940  | 947  | 880       | 891       | 978       | 978       | 885 |
| 28b  | LASSO  | 1000 | 819  | 300  | 992  | 450  | 895       | 427       | 999       | 696       | 247 |
|      | SCAD   | 1000 | 817  | 860  | 992  | 991  | 895       | 914       | 999       | 999       | 863 |
|      | MCP    | 1000 | 817  | 835  | 992  | 991  | 895       | 903       | 999       | 999       | 860 |
| 29a  | LASSO  | 0    | -    | 0    | -    | 0    | -         | 0         | -         | 0         | 0   |
|      | SCAD   | 0    | -    | 0    | -    | 0    | -         | 0         | -         | 0         | 0   |
|      | MCP    | 0    | -    | 0    | -    | 0    | -         | 0         | -         | 0         | 0   |
| 29b  | LASSO  | 0    | 0    | 0    | 0    | 0    | 0         | 0         | 0         | 0         | 0   |
|      | SCAD   | 0    | 0    | 0    | 0    | 0    | 0         | 0         | 0         | 0         | 0   |
|      | MCP    | 0    | 0    | 0    | 0    | 0    | 0         | 0         | 0         | 0         | 0   |

| Case | Method | Seq  | AIC1 | AIC2 | BIC1 | BIC2 | $L_q$ -A1 | $L_q$ -A2 | $L_q$ -B1 | $L_q$ -B2 | CV  |
|------|--------|------|------|------|------|------|-----------|-----------|-----------|-----------|-----|
| 30a  | LASSO  | 0    | -    | 0    | -    | 0    | -         | 0         | -         | 0         | 0   |
|      | SCAD   | 0    | -    | 0    | -    | 0    | -         | 0         | -         | 0         | 0   |
|      | MCP    | 0    | -    | 0    | -    | 0    | -         | 0         | -         | 0         | 0   |
| 30b  | LASSO  | 433  | 225  | 0    | 419  | 0    | 308       | 0         | 310       | 2         | 0   |
|      | SCAD   | 531  | 255  | 8    | 501  | 32   | 332       | 60        | 357       | 129       | 1   |
|      | MCP    | 732  | 338  | 56   | 683  | 147  | 371       | 230       | 391       | 426       | 26  |
| 31a  | LASSO  | 0    | -    | 0    | -    | 0    | -         | 0         | -         | 0         | 0   |
|      | SCAD   | 0    | -    | 0    | -    | 0    | -         | 0         | -         | 0         | 0   |
|      | MCP    | 0    | -    | 0    | -    | 0    | -         | 0         | -         | 0         | 0   |
| 31b  | LASSO  | 990  | 497  | 0    | 932  | 0    | 541       | 0         | 973       | 3         | 0   |
|      | SCAD   | 1000 | 452  | 595  | 911  | 970  | 366       | 846       | 980       | 996       | 751 |
|      | MCP    | 1000 | 453  | 465  | 911  | 955  | 366       | 728       | 980       | 992       | 806 |
| 32a  | LASSO  | 0    | -    | 0    | -    | 0    | -         | 0         | -         | 0         | 0   |
|      | SCAD   | 0    | -    | 0    | -    | 0    | -         | 0         | -         | 0         | 0   |
|      | MCP    | 0    | -    | 0    | -    | 0    | -         | 0         | -         | 0         | 0   |
| 32b  | LASSO  | 991  | 505  | 0    | 933  | 0    | 544       | 0         | 974       | 2         | 0   |
|      | SCAD   | 1000 | 457  | 624  | 912  | 975  | 365       | 852       | 980       | 996       | 763 |
|      | MCP    | 1000 | 459  | 492  | 912  | 956  | 365       | 741       | 980       | 993       | 814 |

Table S26: The results on model selection for  $q = 5/3$  (the  $t$ -error with  $\nu = 2$ ).

| Case | Method | Seq  | AIC1 | AIC2 | BIC1 | BIC2 | $L_q$ -A1 | $L_q$ -A2 | $L_q$ -B1 | $L_q$ -B2 | CV   |
|------|--------|------|------|------|------|------|-----------|-----------|-----------|-----------|------|
| 1a   | LASSO  | 27   | 4    | 4    | 2    | 1    | 0         | 0         | 4         | 3         | 4    |
|      | SCAD   | 27   | 4    | 4    | 2    | 1    | 0         | 0         | 4         | 2         | 5    |
|      | MCP    | 27   | 4    | 4    | 2    | 2    | 0         | 0         | 4         | 3         | 1    |
| 1b   | LASSO  | 20   | 1    | 2    | 0    | 0    | 0         | 0         | 2         | 2         | 1    |
|      | SCAD   | 20   | 1    | 2    | 0    | 0    | 0         | 0         | 2         | 1         | 1    |
|      | MCP    | 20   | 1    | 1    | 0    | 0    | 0         | 0         | 2         | 2         | 0    |
| 2a   | LASSO  | 852  | 642  | 93   | 779  | 254  | 3         | 2         | 55        | 37        | 104  |
|      | SCAD   | 855  | 646  | 236  | 785  | 369  | 3         | 17        | 51        | 114       | 131  |
|      | MCP    | 865  | 656  | 358  | 791  | 541  | 3         | 10        | 50        | 91        | 316  |
| 2b   | LASSO  | 830  | 747  | 58   | 810  | 293  | 0         | 0         | 25        | 20        | 106  |
|      | SCAD   | 830  | 746  | 135  | 810  | 292  | 0         | 2         | 25        | 66        | 101  |
|      | MCP    | 831  | 748  | 259  | 810  | 479  | 0         | 0         | 25        | 66        | 270  |
| 3a   | LASSO  | 999  | 785  | 91   | 929  | 254  | 3         | 3         | 54        | 37        | 105  |
|      | SCAD   | 999  | 788  | 753  | 926  | 953  | 3         | 17        | 50        | 132       | 779  |
|      | MCP    | 999  | 788  | 719  | 926  | 933  | 3         | 9         | 50        | 92        | 819  |
| 3b   | LASSO  | 998  | 910  | 54   | 981  | 289  | 0         | 0         | 24        | 20        | 110  |
|      | SCAD   | 998  | 913  | 822  | 980  | 981  | 0         | 2         | 25        | 105       | 790  |
|      | MCP    | 998  | 913  | 802  | 980  | 983  | 0         | 0         | 25        | 67        | 825  |
| 4a   | LASSO  | 1000 | 786  | 96   | 930  | 267  | 3         | 4         | 53        | 42        | 104  |
|      | SCAD   | 1000 | 786  | 750  | 926  | 954  | 3         | 40        | 50        | 149       | 790  |
|      | MCP    | 1000 | 787  | 710  | 926  | 929  | 3         | 16        | 50        | 98        | 830  |
| 4b   | LASSO  | 1000 | 910  | 60   | 983  | 289  | 0         | 0         | 24        | 22        | 111  |
|      | SCAD   | 1000 | 914  | 800  | 981  | 986  | 0         | 3         | 24        | 111       | 799  |
|      | MCP    | 1000 | 914  | 779  | 981  | 983  | 0         | 1         | 24        | 70        | 834  |
| 5a   | LASSO  | 0    | -    | 0    | -    | 0    | -         | 0         | -         | 0         | 0    |
|      | SCAD   | 0    | -    | 0    | -    | 0    | -         | 0         | -         | 0         | 0    |
|      | MCP    | 0    | -    | 0    | -    | 0    | -         | 0         | -         | 0         | 0    |
| 5b   | LASSO  | 0    | 0    | 0    | 0    | 0    | 0         | 0         | 0         | 0         | 0    |
|      | SCAD   | 0    | 0    | 0    | 0    | 0    | 0         | 0         | 0         | 0         | 0    |
|      | MCP    | 0    | 0    | 0    | 0    | 0    | 0         | 0         | 0         | 0         | 0    |
| 6a   | LASSO  | 1    | -    | 0    | -    | 0    | -         | 0         | -         | 0         | 0    |
|      | SCAD   | 6    | -    | 0    | -    | 1    | -         | 0         | -         | 0         | 0    |
|      | MCP    | 63   | -    | 0    | -    | 12   | -         | 0         | -         | 1         | 2    |
| 6b   | LASSO  | 87   | 80   | 0    | 87   | 0    | 0         | 0         | 0         | 0         | 0    |
|      | SCAD   | 90   | 82   | 0    | 90   | 0    | 0         | 0         | 0         | 0         | 0    |
|      | MCP    | 107  | 94   | 0    | 106  | 0    | 0         | 0         | 0         | 0         | 0    |
| 7a   | LASSO  | 64   | -    | 11   | -    | 11   | -         | 11        | -         | 11        | 11   |
|      | SCAD   | 992  | -    | 915  | -    | 955  | -         | 859       | -         | 866       | 939  |
|      | MCP    | 996  | -    | 905  | -    | 946  | -         | 859       | -         | 859       | 956  |
| 7b   | LASSO  | 998  | 935  | 0    | 984  | 0    | 0         | 0         | 0         | 0         | 0    |
|      | SCAD   | 999  | 949  | 687  | 987  | 969  | 0         | 0         | 0         | 0         | 655  |
|      | MCP    | 999  | 948  | 631  | 987  | 962  | 0         | 0         | 0         | 0         | 748  |
| 8a   | LASSO  | 57   | -    | 50   | -    | 50   | -         | 50        | -         | 50        | 50   |
|      | SCAD   | 1000 | -    | 1000 | -    | 1000 | -         | 999       | -         | 999       | 1000 |
|      | MCP    | 1000 | -    | 1000 | -    | 1000 | -         | 999       | -         | 999       | 1000 |
| 8b   | LASSO  | 1000 | 937  | 0    | 988  | 0    | 0         | 0         | 0         | 0         | 0    |
|      | SCAD   | 1000 | 948  | 704  | 987  | 989  | 0         | 0         | 0         | 8         | 675  |
|      | MCP    | 1000 | 948  | 630  | 987  | 975  | 0         | 0         | 0         | 0         | 762  |
| 9a   | LASSO  | 5    | 0    | 1    | 0    | 0    | 1         | 0         | 0         | 0         | 0    |
|      | SCAD   | 6    | 0    | 1    | 0    | 0    | 0         | 0         | 0         | 0         | 1    |
|      | MCP    | 5    | 0    | 1    | 0    | 0    | 0         | 0         | 0         | 0         | 0    |
| 9b   | LASSO  | 7    | 0    | 0    | 0    | 0    | 1         | 0         | 2         | 1         | 0    |
|      | SCAD   | 7    | 0    | 0    | 0    | 0    | 1         | 0         | 2         | 1         | 0    |
|      | MCP    | 6    | 0    | 0    | 0    | 0    | 1         | 1         | 1         | 1         | 0    |

| Case | Method | Seq  | AIC1 | AIC2 | BIC1 | BIC2 | $L_q$ -A1 | $L_q$ -A2 | $L_q$ -B1 | $L_q$ -B2 | CV  |
|------|--------|------|------|------|------|------|-----------|-----------|-----------|-----------|-----|
| 10a  | LASSO  | 787  | 597  | 37   | 727  | 129  | 10        | 4         | 81        | 11        | 32  |
|      | SCAD   | 785  | 583  | 204  | 728  | 315  | 8         | 26        | 74        | 140       | 106 |
|      | MCP    | 799  | 595  | 324  | 739  | 455  | 8         | 20        | 74        | 128       | 252 |
| 10b  | LASSO  | 766  | 668  | 28   | 750  | 143  | 3         | 0         | 62        | 10        | 38  |
|      | SCAD   | 765  | 673  | 81   | 750  | 187  | 3         | 8         | 61        | 77        | 56  |
|      | MCP    | 764  | 672  | 183  | 749  | 332  | 3         | 5         | 61        | 93        | 141 |
| 11a  | LASSO  | 999  | 789  | 35   | 935  | 124  | 10        | 4         | 82        | 10        | 28  |
|      | SCAD   | 999  | 780  | 751  | 931  | 950  | 8         | 26        | 73        | 176       | 776 |
|      | MCP    | 999  | 780  | 715  | 931  | 929  | 8         | 20        | 73        | 129       | 822 |
| 11b  | LASSO  | 998  | 901  | 27   | 984  | 143  | 3         | 0         | 63        | 10        | 38  |
|      | SCAD   | 998  | 905  | 807  | 984  | 981  | 3         | 8         | 61        | 139       | 793 |
|      | MCP    | 998  | 905  | 802  | 984  | 982  | 3         | 5         | 61        | 104       | 824 |
| 12a  | LASSO  | 1000 | 791  | 44   | 933  | 130  | 10        | 9         | 81        | 23        | 29  |
|      | SCAD   | 1000 | 780  | 754  | 933  | 951  | 8         | 61        | 73        | 217       | 798 |
|      | MCP    | 1000 | 781  | 707  | 934  | 931  | 8         | 37        | 73        | 143       | 836 |
| 12b  | LASSO  | 1000 | 901  | 25   | 986  | 147  | 3         | 2         | 62        | 15        | 34  |
|      | SCAD   | 1000 | 906  | 802  | 986  | 989  | 3         | 16        | 61        | 156       | 811 |
|      | MCP    | 1000 | 906  | 792  | 986  | 984  | 3         | 9         | 61        | 109       | 835 |
| 13a  | LASSO  | 0    | -    | 0    | -    | 0    | -         | 0         | -         | 0         | 0   |
|      | SCAD   | 0    | -    | 0    | -    | 0    | -         | 0         | -         | 0         | 0   |
|      | MCP    | 0    | -    | 0    | -    | 0    | -         | 0         | -         | 0         | 0   |
| 13b  | LASSO  | 0    | 0    | 0    | 0    | 0    | 0         | 0         | 0         | 0         | 0   |
|      | SCAD   | 0    | 0    | 0    | 0    | 0    | 0         | 0         | 0         | 0         | 0   |
|      | MCP    | 0    | 0    | 0    | 0    | 0    | 0         | 0         | 0         | 0         | 0   |
| 14a  | LASSO  | 0    | -    | 0    | -    | 0    | -         | 0         | -         | 0         | 0   |
|      | SCAD   | 0    | -    | 0    | -    | 0    | -         | 0         | -         | 0         | 0   |
|      | MCP    | 0    | -    | 0    | -    | 0    | -         | 0         | -         | 0         | 0   |
| 14b  | LASSO  | 24   | 19   | 0    | 22   | 0    | 0         | 0         | 0         | 0         | 0   |
|      | SCAD   | 28   | 23   | 0    | 27   | 0    | 0         | 0         | 0         | 0         | 0   |
|      | MCP    | 50   | 41   | 0    | 48   | 0    | 0         | 0         | 0         | 0         | 0   |
| 15a  | LASSO  | 0    | -    | 0    | -    | 0    | -         | 0         | -         | 0         | 0   |
|      | SCAD   | 776  | -    | 760  | -    | 770  | -         | 758       | -         | 758       | 670 |
|      | MCP    | 880  | -    | 854  | -    | 857  | -         | 852       | -         | 852       | 807 |
| 15b  | LASSO  | 997  | 912  | 0    | 984  | 0    | 0         | 0         | 0         | 0         | 0   |
|      | SCAD   | 997  | 914  | 640  | 983  | 963  | 0         | 0         | 0         | 0         | 665 |
|      | MCP    | 997  | 915  | 590  | 982  | 949  | 0         | 0         | 0         | 0         | 745 |
| 16a  | LASSO  | 0    | -    | 0    | -    | 0    | -         | 0         | -         | 0         | 0   |
|      | SCAD   | 815  | -    | 815  | -    | 815  | -         | 815       | -         | 815       | 708 |
|      | MCP    | 893  | -    | 893  | -    | 893  | -         | 893       | -         | 893       | 837 |
| 16b  | LASSO  | 1000 | 916  | 0    | 987  | 0    | 0         | 0         | 0         | 0         | 0   |
|      | SCAD   | 1000 | 918  | 658  | 983  | 981  | 0         | 0         | 0         | 0         | 684 |
|      | MCP    | 1000 | 918  | 598  | 983  | 960  | 0         | 0         | 0         | 0         | 756 |
| 17a  | LASSO  | 6    | 0    | 1    | 0    | 0    | 3         | 2         | 0         | 2         | 1   |
|      | SCAD   | 7    | 0    | 1    | 0    | 0    | 3         | 2         | 0         | 2         | 0   |
|      | MCP    | 8    | 0    | 1    | 0    | 0    | 2         | 3         | 0         | 2         | 0   |
| 17b  | LASSO  | 3    | 0    | 0    | 0    | 0    | 2         | 0         | 0         | 1         | 0   |
|      | SCAD   | 4    | 0    | 0    | 0    | 0    | 2         | 1         | 0         | 1         | 0   |
|      | MCP    | 5    | 0    | 0    | 0    | 0    | 2         | 1         | 0         | 1         | 0   |
| 18a  | LASSO  | 769  | 586  | 42   | 722  | 107  | 50        | 3         | 169       | 19        | 28  |
|      | SCAD   | 772  | 587  | 240  | 722  | 327  | 44        | 70        | 160       | 211       | 150 |
|      | MCP    | 796  | 606  | 337  | 745  | 478  | 44        | 62        | 159       | 210       | 277 |
| 18b  | LASSO  | 743  | 659  | 29   | 729  | 98   | 19        | 1         | 139       | 19        | 27  |
|      | SCAD   | 739  | 659  | 97   | 725  | 195  | 19        | 30        | 137       | 134       | 64  |
|      | MCP    | 744  | 664  | 198  | 731  | 339  | 19        | 27        | 137       | 158       | 164 |
| 19a  | LASSO  | 997  | 778  | 44   | 932  | 109  | 47        | 3         | 170       | 20        | 28  |
|      | SCAD   | 998  | 783  | 743  | 934  | 945  | 44        | 69        | 161       | 244       | 782 |
|      | MCP    | 998  | 783  | 716  | 935  | 931  | 44        | 61        | 161       | 212       | 825 |
| 19b  | LASSO  | 999  | 911  | 27   | 986  | 99   | 19        | 1         | 141       | 21        | 30  |
|      | SCAD   | 999  | 916  | 820  | 986  | 985  | 19        | 33        | 139       | 210       | 792 |
|      | MCP    | 999  | 917  | 815  | 986  | 981  | 19        | 27        | 139       | 182       | 822 |

| Case | Method | Seq  | AIC1 | AIC2 | BIC1 | BIC2 | $L_q$ -A1 | $L_q$ -A2 | $L_q$ -B1 | $L_q$ -B2 | CV  |
|------|--------|------|------|------|------|------|-----------|-----------|-----------|-----------|-----|
| 20a  | LASSO  | 999  | 782  | 86   | 935  | 147  | 60        | 45        | 171       | 68        | 46  |
|      | SCAD   | 1000 | 785  | 762  | 936  | 949  | 51        | 145       | 160       | 302       | 816 |
|      | MCP    | 1000 | 786  | 729  | 937  | 934  | 51        | 107       | 160       | 241       | 848 |
| 20b  | LASSO  | 1000 | 913  | 34   | 986  | 111  | 19        | 15        | 141       | 31        | 30  |
|      | SCAD   | 1000 | 919  | 825  | 987  | 990  | 19        | 45        | 139       | 225       | 813 |
|      | MCP    | 1000 | 919  | 815  | 987  | 984  | 19        | 38        | 139       | 189       | 833 |
| 21a  | LASSO  | 0    | -    | 0    | -    | 0    | -         | 0         | -         | 0         | 0   |
|      | SCAD   | 0    | -    | 0    | -    | 0    | -         | 0         | -         | 0         | 0   |
|      | MCP    | 0    | -    | 0    | -    | 0    | -         | 0         | -         | 0         | 0   |
| 21b  | LASSO  | 0    | 0    | 0    | 0    | 0    | 0         | 0         | 0         | 0         | 0   |
|      | SCAD   | 0    | 0    | 0    | 0    | 0    | 0         | 0         | 0         | 0         | 0   |
|      | MCP    | 0    | 0    | 0    | 0    | 0    | 0         | 0         | 0         | 0         | 0   |
| 22a  | LASSO  | 0    | -    | 0    | -    | 0    | -         | 0         | -         | 0         | 0   |
|      | SCAD   | 0    | -    | 0    | -    | 0    | -         | 0         | -         | 0         | 0   |
|      | MCP    | 0    | -    | 0    | -    | 0    | -         | 0         | -         | 0         | 0   |
| 22b  | LASSO  | 18   | 17   | 0    | 18   | 0    | 0         | 0         | 0         | 0         | 0   |
|      | SCAD   | 27   | 19   | 0    | 27   | 0    | 0         | 0         | 0         | 0         | 0   |
|      | MCP    | 42   | 33   | 0    | 41   | 0    | 0         | 0         | 0         | 0         | 0   |
| 23a  | LASSO  | 0    | -    | 0    | -    | 0    | -         | 0         | -         | 0         | 0   |
|      | SCAD   | 1    | -    | 1    | -    | 1    | -         | 1         | -         | 1         | 0   |
|      | MCP    | 9    | -    | 9    | -    | 9    | -         | 9         | -         | 9         | 0   |
| 23b  | LASSO  | 994  | 867  | 0    | 975  | 0    | 0         | 0         | 0         | 0         | 0   |
|      | SCAD   | 995  | 877  | 642  | 977  | 960  | 0         | 0         | 0         | 0         | 685 |
|      | MCP    | 997  | 880  | 569  | 979  | 944  | 0         | 0         | 0         | 0         | 754 |
| 24a  | LASSO  | 0    | -    | 0    | -    | 0    | -         | 0         | -         | 0         | 0   |
|      | SCAD   | 0    | -    | 0    | -    | 0    | -         | 0         | -         | 0         | 0   |
|      | MCP    | 3    | -    | 3    | -    | 3    | -         | 3         | -         | 3         | 1   |
| 24b  | LASSO  | 1000 | 876  | 0    | 981  | 0    | 0         | 0         | 0         | 0         | 0   |
|      | SCAD   | 1000 | 887  | 665  | 981  | 977  | 0         | 0         | 0         | 23        | 705 |
|      | MCP    | 1000 | 889  | 586  | 981  | 959  | 0         | 0         | 0         | 4         | 770 |
| 25a  | LASSO  | 25   | 0    | 0    | 0    | 0    | 4         | 11        | 1         | 6         | 0   |
|      | SCAD   | 28   | 0    | 0    | 0    | 0    | 3         | 9         | 1         | 4         | 1   |
|      | MCP    | 28   | 0    | 0    | 0    | 0    | 3         | 5         | 1         | 2         | 0   |
| 25b  | LASSO  | 22   | 0    | 0    | 0    | 0    | 4         | 4         | 4         | 4         | 2   |
|      | SCAD   | 21   | 0    | 0    | 0    | 0    | 4         | 5         | 4         | 3         | 0   |
|      | MCP    | 21   | 0    | 0    | 0    | 0    | 4         | 4         | 4         | 2         | 0   |
| 26a  | LASSO  | 796  | 659  | 112  | 762  | 175  | 199       | 37        | 373       | 81        | 67  |
|      | SCAD   | 800  | 654  | 377  | 764  | 467  | 198       | 214       | 370       | 377       | 284 |
|      | MCP    | 821  | 668  | 458  | 779  | 562  | 198       | 205       | 370       | 384       | 399 |
| 26b  | LASSO  | 801  | 721  | 87   | 794  | 182  | 126       | 14        | 333       | 72        | 63  |
|      | SCAD   | 805  | 725  | 233  | 798  | 309  | 126       | 140       | 333       | 285       | 160 |
|      | MCP    | 806  | 726  | 310  | 799  | 452  | 126       | 142       | 332       | 320       | 254 |
| 27a  | LASSO  | 999  | 829  | 116  | 947  | 178  | 204       | 41        | 383       | 80        | 70  |
|      | SCAD   | 999  | 827  | 769  | 946  | 952  | 201       | 221       | 378       | 416       | 785 |
|      | MCP    | 999  | 827  | 763  | 946  | 949  | 201       | 209       | 378       | 400       | 805 |
| 27b  | LASSO  | 999  | 917  | 88   | 994  | 188  | 128       | 15        | 351       | 72        | 64  |
|      | SCAD   | 999  | 915  | 849  | 994  | 987  | 128       | 150       | 349       | 382       | 787 |
|      | MCP    | 999  | 915  | 844  | 994  | 990  | 128       | 146       | 349       | 369       | 825 |
| 28a  | LASSO  | 1000 | 840  | 263  | 948  | 314  | 255       | 219       | 390       | 251       | 217 |
|      | SCAD   | 1000 | 838  | 825  | 947  | 964  | 225       | 361       | 378       | 501       | 851 |
|      | MCP    | 1000 | 838  | 800  | 947  | 959  | 225       | 318       | 378       | 455       | 857 |
| 28b  | LASSO  | 1000 | 919  | 156  | 995  | 229  | 128       | 122       | 351       | 146       | 111 |
|      | SCAD   | 1000 | 918  | 860  | 995  | 993  | 128       | 201       | 349       | 412       | 832 |
|      | MCP    | 1000 | 918  | 849  | 995  | 993  | 128       | 175       | 349       | 375       | 851 |
| 29a  | LASSO  | 0    | -    | 0    | -    | 0    | -         | 0         | -         | 0         | 0   |
|      | SCAD   | 0    | -    | 0    | -    | 0    | -         | 0         | -         | 0         | 0   |
|      | MCP    | 0    | -    | 0    | -    | 0    | -         | 0         | -         | 0         | 0   |
| 29b  | LASSO  | 0    | 0    | 0    | 0    | 0    | 0         | 0         | 0         | 0         | 0   |
|      | SCAD   | 0    | 0    | 0    | 0    | 0    | 0         | 0         | 0         | 0         | 0   |
|      | MCP    | 0    | 0    | 0    | 0    | 0    | 0         | 0         | 0         | 0         | 0   |



| Case | Method | Seq  | AIC1 | AIC2 | BIC1 | BIC2 | $L_q$ -A1 | $L_q$ -A2 | $L_q$ -B1 | $L_q$ -B2 | CV  |
|------|--------|------|------|------|------|------|-----------|-----------|-----------|-----------|-----|
| 30a  | LASSO  | 0    | -    | 0    | -    | 0    | -         | 0         | -         | 0         | 0   |
|      | SCAD   | 0    | -    | 0    | -    | 0    | -         | 0         | -         | 0         | 0   |
|      | MCP    | 0    | -    | 0    | -    | 0    | -         | 0         | -         | 0         | 0   |
| 30b  | LASSO  | 35   | 22   | 0    | 35   | 0    | 0         | 0         | 1         | 0         | 0   |
|      | SCAD   | 30   | 16   | 0    | 28   | 0    | 0         | 0         | 2         | 0         | 0   |
|      | MCP    | 59   | 41   | 0    | 58   | 1    | 0         | 0         | 1         | 1         | 0   |
| 31a  | LASSO  | 0    | -    | 0    | -    | 0    | -         | 0         | -         | 0         | 0   |
|      | SCAD   | 0    | -    | 0    | -    | 0    | -         | 0         | -         | 0         | 0   |
|      | MCP    | 0    | -    | 0    | -    | 0    | -         | 0         | -         | 0         | 0   |
| 31b  | LASSO  | 980  | 816  | 0    | 956  | 0    | 0         | 0         | 4         | 0         | 0   |
|      | SCAD   | 997  | 846  | 624  | 971  | 954  | 0         | 0         | 0         | 33        | 715 |
|      | MCP    | 998  | 847  | 560  | 972  | 951  | 0         | 0         | 0         | 13        | 783 |
| 32a  | LASSO  | 0    | -    | 0    | -    | 0    | -         | 0         | -         | 0         | 0   |
|      | SCAD   | 0    | -    | 0    | -    | 0    | -         | 0         | -         | 0         | 0   |
|      | MCP    | 0    | -    | 0    | -    | 0    | -         | 0         | -         | 0         | 0   |
| 32b  | LASSO  | 993  | 826  | 0    | 969  | 0    | 0         | 0         | 4         | 0         | 0   |
|      | SCAD   | 1000 | 848  | 656  | 974  | 973  | 0         | 0         | 0         | 56        | 735 |
|      | MCP    | 1000 | 847  | 598  | 974  | 959  | 0         | 0         | 0         | 14        | 793 |

Table S27: The results on model selection for  $q = 2$  (the Cauchy error).

| Case | Method | Seq | AIC1 | AIC2 | BIC1 | BIC2 | $L_q$ -A1 | $L_q$ -A2 | $L_q$ -B1 | $L_q$ -B2 | CV  |
|------|--------|-----|------|------|------|------|-----------|-----------|-----------|-----------|-----|
| 1a   | LASSO  | 24  | 1    | 3    | 0    | 0    | 0         | 0         | 0         | 0         | 2   |
|      | SCAD   | 24  | 1    | 3    | 0    | 0    | 0         | 0         | 0         | 0         | 1   |
|      | MCP    | 27  | 1    | 3    | 0    | 1    | 0         | 0         | 0         | 0         | 0   |
| 1b   | LASSO  | 22  | 0    | 1    | 0    | 0    | 0         | 0         | 0         | 0         | 0   |
|      | SCAD   | 22  | 0    | 1    | 0    | 0    | 0         | 0         | 0         | 0         | 3   |
|      | MCP    | 22  | 0    | 2    | 0    | 0    | 0         | 0         | 0         | 0         | 1   |
| 2a   | LASSO  | 117 | 81   | 22   | 80   | 34   | 0         | 0         | 0         | 0         | 21  |
|      | SCAD   | 117 | 83   | 28   | 81   | 36   | 0         | 0         | 0         | 0         | 28  |
|      | MCP    | 118 | 83   | 37   | 81   | 52   | 0         | 0         | 0         | 0         | 43  |
| 2b   | LASSO  | 27  | 3    | 5    | 2    | 4    | 0         | 0         | 0         | 0         | 1   |
|      | SCAD   | 27  | 3    | 5    | 2    | 4    | 0         | 0         | 0         | 0         | 3   |
|      | MCP    | 26  | 3    | 3    | 2    | 4    | 0         | 0         | 0         | 0         | 1   |
| 3a   | LASSO  | 845 | 803  | 32   | 821  | 59   | 0         | 0         | 0         | 0         | 39  |
|      | SCAD   | 844 | 806  | 491  | 823  | 561  | 0         | 0         | 0         | 0         | 431 |
|      | MCP    | 844 | 807  | 526  | 824  | 608  | 0         | 0         | 0         | 0         | 546 |
| 3b   | LASSO  | 530 | 518  | 19   | 517  | 26   | 0         | 0         | 0         | 0         | 29  |
|      | SCAD   | 531 | 519  | 131  | 518  | 140  | 0         | 0         | 0         | 0         | 89  |
|      | MCP    | 530 | 518  | 197  | 517  | 214  | 0         | 0         | 0         | 0         | 173 |
| 4a   | LASSO  | 986 | 942  | 37   | 961  | 66   | 0         | 0         | 0         | 0         | 43  |
|      | SCAD   | 986 | 948  | 675  | 966  | 807  | 0         | 0         | 0         | 0         | 771 |
|      | MCP    | 986 | 950  | 675  | 967  | 793  | 0         | 0         | 0         | 0         | 862 |
| 4b   | LASSO  | 941 | 933  | 24   | 934  | 28   | 0         | 0         | 0         | 0         | 28  |
|      | SCAD   | 941 | 932  | 728  | 933  | 817  | 0         | 0         | 0         | 0         | 718 |
|      | MCP    | 941 | 932  | 759  | 933  | 836  | 0         | 0         | 0         | 0         | 774 |
| 5a   | LASSO  | 0   | -    | 0    | -    | 0    | -         | 0         | -         | 0         | 0   |
|      | SCAD   | 0   | -    | 0    | -    | 0    | -         | 0         | -         | 0         | 0   |
|      | MCP    | 0   | -    | 0    | -    | 0    | -         | 0         | -         | 0         | 0   |
| 5b   | LASSO  | 0   | 0    | 0    | 0    | 0    | 0         | 0         | 0         | 0         | 0   |
|      | SCAD   | 0   | 0    | 0    | 0    | 0    | 0         | 0         | 0         | 0         | 0   |
|      | MCP    | 0   | 0    | 0    | 0    | 0    | 0         | 0         | 0         | 0         | 0   |
| 6a   | LASSO  | 0   | -    | 0    | -    | 0    | -         | 0         | -         | 0         | 0   |
|      | SCAD   | 0   | -    | 0    | -    | 0    | -         | 0         | -         | 0         | 0   |
|      | MCP    | 0   | -    | 0    | -    | 0    | -         | 0         | -         | 0         | 0   |
| 6b   | LASSO  | 0   | 0    | 0    | 0    | 0    | 0         | 0         | 0         | 0         | 0   |
|      | SCAD   | 0   | 0    | 0    | 0    | 0    | 0         | 0         | 0         | 0         | 0   |
|      | MCP    | 0   | 0    | 0    | 0    | 0    | 0         | 0         | 0         | 0         | 0   |
| 7a   | LASSO  | 18  | -    | 0    | -    | 0    | -         | 0         | -         | 0         | 0   |
|      | SCAD   | 477 | -    | 184  | -    | 314  | -         | 59        | -         | 59        | 279 |
|      | MCP    | 582 | -    | 157  | -    | 305  | -         | 58        | -         | 59        | 357 |
| 7b   | LASSO  | 221 | 221  | 0    | 221  | 0    | 0         | 0         | 0         | 0         | 0   |
|      | SCAD   | 226 | 226  | 1    | 226  | 2    | 0         | 0         | 0         | 0         | 1   |
|      | MCP    | 235 | 235  | 14   | 235  | 17   | 0         | 0         | 0         | 0         | 20  |
| 8a   | LASSO  | 54  | -    | 29   | -    | 29   | -         | 29        | -         | 29        | 29  |
|      | SCAD   | 949 | -    | 870  | -    | 890  | -         | 839       | -         | 839       | 915 |
|      | MCP    | 958 | -    | 865  | -    | 878  | -         | 839       | -         | 839       | 935 |
| 8b   | LASSO  | 910 | 910  | 0    | 910  | 0    | 0         | 0         | 0         | 0         | 0   |
|      | SCAD   | 910 | 909  | 534  | 910  | 689  | 0         | 0         | 0         | 0         | 593 |
|      | MCP    | 911 | 910  | 564  | 911  | 710  | 0         | 0         | 0         | 0         | 688 |
| 9a   | LASSO  | 8   | 0    | 2    | 0    | 2    | 0         | 0         | 0         | 0         | 2   |
|      | SCAD   | 8   | 0    | 2    | 0    | 2    | 0         | 0         | 0         | 0         | 1   |
|      | MCP    | 7   | 0    | 1    | 0    | 1    | 0         | 0         | 0         | 0         | 0   |
| 9b   | LASSO  | 6   | 0    | 1    | 0    | 1    | 0         | 0         | 0         | 0         | 0   |
|      | SCAD   | 6   | 0    | 1    | 0    | 1    | 0         | 0         | 0         | 0         | 0   |
|      | MCP    | 5   | 0    | 0    | 0    | 0    | 0         | 0         | 0         | 0         | 0   |

| Case | Method | Seq | AIC1 | AIC2 | BIC1 | BIC2 | $L_q$ -A1 | $L_q$ -A2 | $L_q$ -B1 | $L_q$ -B2 | CV  |
|------|--------|-----|------|------|------|------|-----------|-----------|-----------|-----------|-----|
| 10a  | LASSO  | 67  | 57   | 9    | 57   | 17   | 0         | 0         | 0         | 0         | 4   |
|      | SCAD   | 69  | 58   | 12   | 58   | 15   | 0         | 0         | 0         | 0         | 8   |
|      | MCP    | 69  | 57   | 16   | 57   | 24   | 0         | 0         | 0         | 0         | 12  |
| 10b  | LASSO  | 6   | 0    | 1    | 0    | 0    | 0         | 0         | 0         | 0         | 0   |
|      | SCAD   | 6   | 0    | 1    | 0    | 0    | 0         | 0         | 0         | 0         | 0   |
|      | MCP    | 6   | 0    | 0    | 0    | 0    | 0         | 0         | 0         | 0         | 0   |
| 11a  | LASSO  | 810 | 753  | 12   | 777  | 29   | 0         | 0         | 0         | 0         | 19  |
|      | SCAD   | 810 | 762  | 454  | 782  | 543  | 0         | 0         | 0         | 0         | 431 |
|      | MCP    | 815 | 766  | 493  | 786  | 593  | 0         | 0         | 0         | 0         | 532 |
| 11b  | LASSO  | 478 | 476  | 7    | 476  | 9    | 0         | 0         | 0         | 0         | 13  |
|      | SCAD   | 478 | 475  | 85   | 475  | 103  | 0         | 0         | 0         | 0         | 75  |
|      | MCP    | 476 | 473  | 135  | 473  | 154  | 0         | 0         | 0         | 0         | 144 |
| 12a  | LASSO  | 982 | 909  | 14   | 935  | 32   | 0         | 0         | 0         | 0         | 19  |
|      | SCAD   | 983 | 923  | 657  | 944  | 801  | 0         | 0         | 0         | 0         | 777 |
|      | MCP    | 984 | 924  | 655  | 945  | 796  | 0         | 0         | 0         | 0         | 851 |
| 12b  | LASSO  | 939 | 936  | 7    | 936  | 9    | 0         | 0         | 0         | 0         | 13  |
|      | SCAD   | 940 | 938  | 698  | 938  | 815  | 0         | 0         | 0         | 0         | 722 |
|      | MCP    | 940 | 938  | 721  | 938  | 831  | 0         | 0         | 0         | 0         | 787 |
| 13a  | LASSO  | 0   | -    | 0    | -    | 0    | -         | 0         | -         | 0         | 0   |
|      | SCAD   | 0   | -    | 0    | -    | 0    | -         | 0         | -         | 0         | 0   |
|      | MCP    | 0   | -    | 0    | -    | 0    | -         | 0         | -         | 0         | 0   |
| 13b  | LASSO  | 0   | 0    | 0    | 0    | 0    | 0         | 0         | 0         | 0         | 0   |
|      | SCAD   | 0   | 0    | 0    | 0    | 0    | 0         | 0         | 0         | 0         | 0   |
|      | MCP    | 0   | 0    | 0    | 0    | 0    | 0         | 0         | 0         | 0         | 0   |
| 14a  | LASSO  | 0   | -    | 0    | -    | 0    | -         | 0         | -         | 0         | 0   |
|      | SCAD   | 0   | -    | 0    | -    | 0    | -         | 0         | -         | 0         | 0   |
|      | MCP    | 0   | -    | 0    | -    | 0    | -         | 0         | -         | 0         | 0   |
| 14b  | LASSO  | 0   | 0    | 0    | 0    | 0    | 0         | 0         | 0         | 0         | 0   |
|      | SCAD   | 0   | 0    | 0    | 0    | 0    | 0         | 0         | 0         | 0         | 0   |
|      | MCP    | 0   | 0    | 0    | 0    | 0    | 0         | 0         | 0         | 0         | 0   |
| 15a  | LASSO  | 0   | -    | 0    | -    | 0    | -         | 0         | -         | 0         | 0   |
|      | SCAD   | 255 | -    | 183  | -    | 219  | -         | 150       | -         | 150       | 136 |
|      | MCP    | 333 | -    | 202  | -    | 229  | -         | 176       | -         | 176       | 177 |
| 15b  | LASSO  | 162 | 162  | 0    | 162  | 0    | 0         | 0         | 0         | 0         | 0   |
|      | SCAD   | 164 | 162  | 0    | 162  | 2    | 0         | 0         | 0         | 0         | 1   |
|      | MCP    | 200 | 200  | 15   | 200  | 19   | 0         | 0         | 0         | 0         | 15  |
| 16a  | LASSO  | 0   | -    | 0    | -    | 0    | -         | 0         | -         | 0         | 0   |
|      | SCAD   | 753 | -    | 742  | -    | 746  | -         | 734       | -         | 734       | 657 |
|      | MCP    | 836 | -    | 817  | -    | 820  | -         | 811       | -         | 811       | 761 |
| 16b  | LASSO  | 892 | 881  | 0    | 883  | 0    | 0         | 0         | 0         | 0         | 0   |
|      | SCAD   | 895 | 891  | 502  | 892  | 697  | 0         | 0         | 0         | 0         | 608 |
|      | MCP    | 903 | 898  | 519  | 899  | 685  | 0         | 0         | 0         | 0         | 689 |
| 17a  | LASSO  | 7   | 0    | 0    | 0    | 0    | 0         | 0         | 0         | 0         | 0   |
|      | SCAD   | 7   | 0    | 0    | 0    | 0    | 0         | 0         | 0         | 0         | 0   |
|      | MCP    | 7   | 0    | 0    | 0    | 0    | 0         | 0         | 0         | 0         | 0   |
| 17b  | LASSO  | 4   | 0    | 0    | 0    | 0    | 0         | 0         | 0         | 0         | 0   |
|      | SCAD   | 4   | 0    | 0    | 0    | 0    | 0         | 0         | 0         | 0         | 0   |
|      | MCP    | 4   | 0    | 0    | 0    | 0    | 0         | 0         | 0         | 0         | 0   |
| 18a  | LASSO  | 72  | 53   | 6    | 53   | 9    | 0         | 0         | 0         | 0         | 5   |
|      | SCAD   | 68  | 50   | 8    | 49   | 13   | 0         | 0         | 0         | 0         | 3   |
|      | MCP    | 67  | 50   | 12   | 49   | 21   | 0         | 0         | 0         | 0         | 7   |
| 18b  | LASSO  | 3   | 0    | 1    | 0    | 1    | 0         | 0         | 0         | 0         | 0   |
|      | SCAD   | 3   | 0    | 1    | 0    | 0    | 0         | 0         | 0         | 0         | 0   |
|      | MCP    | 4   | 0    | 0    | 0    | 0    | 0         | 0         | 0         | 0         | 0   |
| 19a  | LASSO  | 807 | 712  | 13   | 745  | 22   | 0         | 0         | 0         | 0         | 14  |
|      | SCAD   | 810 | 719  | 440  | 755  | 546  | 0         | 0         | 0         | 0         | 482 |
|      | MCP    | 811 | 719  | 472  | 756  | 584  | 0         | 0         | 0         | 0         | 547 |
| 19b  | LASSO  | 452 | 450  | 8    | 451  | 11   | 0         | 0         | 0         | 0         | 12  |
|      | SCAD   | 455 | 452  | 103  | 453  | 116  | 0         | 0         | 0         | 0         | 102 |
|      | MCP    | 456 | 454  | 141  | 455  | 167  | 0         | 0         | 0         | 0         | 161 |

| Case | Method | Seq | AIC1 | AIC2 | BIC1 | BIC2 | $L_q$ -A1 | $L_q$ -A2 | $L_q$ -B1 | $L_q$ -B2 | CV  |
|------|--------|-----|------|------|------|------|-----------|-----------|-----------|-----------|-----|
| 20a  | LASSO  | 981 | 858  | 13   | 895  | 28   | 0         | 0         | 0         | 0         | 14  |
|      | SCAD   | 983 | 869  | 641  | 913  | 789  | 0         | 0         | 0         | 0         | 805 |
|      | MCP    | 983 | 869  | 646  | 913  | 784  | 0         | 0         | 0         | 0         | 853 |
| 20b  | LASSO  | 944 | 940  | 10   | 941  | 16   | 0         | 0         | 0         | 0         | 16  |
|      | SCAD   | 944 | 942  | 703  | 942  | 806  | 0         | 0         | 0         | 0         | 738 |
|      | MCP    | 945 | 943  | 718  | 943  | 817  | 0         | 0         | 0         | 0         | 779 |
| 21a  | LASSO  | 0   | -    | 0    | -    | 0    | -         | 0         | -         | 0         | 0   |
|      | SCAD   | 0   | -    | 0    | -    | 0    | -         | 0         | -         | 0         | 0   |
|      | MCP    | 0   | -    | 0    | -    | 0    | -         | 0         | -         | 0         | 0   |
| 21b  | LASSO  | 0   | 0    | 0    | 0    | 0    | 0         | 0         | 0         | 0         | 0   |
|      | SCAD   | 0   | 0    | 0    | 0    | 0    | 0         | 0         | 0         | 0         | 0   |
|      | MCP    | 0   | 0    | 0    | 0    | 0    | 0         | 0         | 0         | 0         | 0   |
| 22a  | LASSO  | 0   | -    | 0    | -    | 0    | -         | 0         | -         | 0         | 0   |
|      | SCAD   | 0   | -    | 0    | -    | 0    | -         | 0         | -         | 0         | 0   |
|      | MCP    | 0   | -    | 0    | -    | 0    | -         | 0         | -         | 0         | 0   |
| 22b  | LASSO  | 0   | 0    | 0    | 0    | 0    | 0         | 0         | 0         | 0         | 0   |
|      | SCAD   | 0   | 0    | 0    | 0    | 0    | 0         | 0         | 0         | 0         | 0   |
|      | MCP    | 0   | 0    | 0    | 0    | 0    | 0         | 0         | 0         | 0         | 0   |
| 23a  | LASSO  | 0   | -    | 0    | -    | 0    | -         | 0         | -         | 0         | 0   |
|      | SCAD   | 2   | -    | 2    | -    | 2    | -         | 2         | -         | 2         | 0   |
|      | MCP    | 0   | -    | 0    | -    | 0    | -         | 0         | -         | 0         | 0   |
| 23b  | LASSO  | 133 | 129  | 0    | 132  | 0    | 0         | 0         | 0         | 0         | 0   |
|      | SCAD   | 143 | 141  | 2    | 142  | 2    | 0         | 0         | 0         | 0         | 2   |
|      | MCP    | 180 | 180  | 18   | 180  | 23   | 0         | 0         | 0         | 0         | 22  |
| 24a  | LASSO  | 0   | -    | 0    | -    | 0    | -         | 0         | -         | 0         | 0   |
|      | SCAD   | 1   | -    | 1    | -    | 1    | -         | 1         | -         | 1         | 0   |
|      | MCP    | 7   | -    | 7    | -    | 7    | -         | 7         | -         | 7         | 1   |
| 24b  | LASSO  | 871 | 835  | 0    | 843  | 0    | 0         | 0         | 0         | 0         | 0   |
|      | SCAD   | 886 | 870  | 460  | 871  | 648  | 0         | 0         | 0         | 0         | 612 |
|      | MCP    | 897 | 882  | 483  | 884  | 648  | 0         | 0         | 0         | 0         | 694 |
| 25a  | LASSO  | 26  | 0    | 0    | 0    | 0    | 1         | 1         | 2         | 0         | 0   |
|      | SCAD   | 23  | 0    | 0    | 0    | 0    | 1         | 2         | 1         | 1         | 0   |
|      | MCP    | 22  | 0    | 0    | 0    | 0    | 1         | 2         | 1         | 1         | 0   |
| 25b  | LASSO  | 34  | 0    | 0    | 0    | 0    | 0         | 0         | 3         | 0         | 0   |
|      | SCAD   | 30  | 0    | 0    | 0    | 0    | 0         | 0         | 3         | 3         | 0   |
|      | MCP    | 31  | 0    | 0    | 0    | 0    | 0         | 0         | 3         | 3         | 0   |
| 26a  | LASSO  | 94  | 58   | 11   | 57   | 16   | 3         | 1         | 10        | 2         | 9   |
|      | SCAD   | 86  | 54   | 13   | 52   | 15   | 3         | 3         | 9         | 8         | 7   |
|      | MCP    | 88  | 57   | 16   | 54   | 21   | 3         | 3         | 9         | 8         | 11  |
| 26b  | LASSO  | 30  | 1    | 0    | 1    | 0    | 0         | 0         | 0         | 0         | 0   |
|      | SCAD   | 30  | 1    | 0    | 1    | 0    | 0         | 0         | 0         | 0         | 0   |
|      | MCP    | 32  | 1    | 0    | 1    | 0    | 0         | 0         | 0         | 0         | 0   |
| 27a  | LASSO  | 804 | 692  | 45   | 732  | 63   | 4         | 1         | 12        | 2         | 40  |
|      | SCAD   | 812 | 696  | 495  | 735  | 585  | 4         | 4         | 11        | 11        | 539 |
|      | MCP    | 813 | 697  | 525  | 736  | 613  | 4         | 4         | 11        | 11        | 586 |
| 27b  | LASSO  | 507 | 483  | 29   | 494  | 34   | 0         | 0         | 3         | 0         | 29  |
|      | SCAD   | 506 | 482  | 184  | 494  | 209  | 0         | 0         | 3         | 3         | 179 |
|      | MCP    | 508 | 483  | 224  | 495  | 253  | 0         | 0         | 3         | 3         | 234 |
| 28a  | LASSO  | 981 | 830  | 58   | 877  | 79   | 20        | 20        | 21        | 20        | 48  |
|      | SCAD   | 984 | 833  | 664  | 879  | 795  | 19        | 22        | 19        | 26        | 830 |
|      | MCP    | 984 | 833  | 669  | 879  | 789  | 19        | 21        | 19        | 23        | 840 |
| 28b  | LASSO  | 947 | 912  | 39   | 926  | 47   | 3         | 3         | 3         | 3         | 32  |
|      | SCAD   | 947 | 910  | 676  | 925  | 795  | 3         | 3         | 3         | 3         | 741 |
|      | MCP    | 948 | 911  | 682  | 926  | 807  | 3         | 3         | 3         | 3         | 793 |
| 29a  | LASSO  | 0   | -    | 0    | -    | 0    | -         | 0         | -         | 0         | 0   |
|      | SCAD   | 0   | -    | 0    | -    | 0    | -         | 0         | -         | 0         | 0   |
|      | MCP    | 0   | -    | 0    | -    | 0    | -         | 0         | -         | 0         | 0   |
| 29b  | LASSO  | 0   | 0    | 0    | 0    | 0    | 0         | 0         | 0         | 0         | 0   |
|      | SCAD   | 0   | 0    | 0    | 0    | 0    | 0         | 0         | 0         | 0         | 0   |
|      | MCP    | 0   | 0    | 0    | 0    | 0    | 0         | 0         | 0         | 0         | 0   |

| Case | Method | Seq | AIC1 | AIC2 | BIC1 | BIC2 | $L_q$ -A1 | $L_q$ -A2 | $L_q$ -B1 | $L_q$ -B2 | CV  |
|------|--------|-----|------|------|------|------|-----------|-----------|-----------|-----------|-----|
| 30a  | LASSO  | 0   | -    | 0    | -    | 0    | -         | 0         | -         | 0         | 0   |
|      | SCAD   | 0   | -    | 0    | -    | 0    | -         | 0         | -         | 0         | 0   |
|      | MCP    | 0   | -    | 0    | -    | 0    | -         | 0         | -         | 0         | 0   |
| 30b  | LASSO  | 0   | 0    | 0    | 0    | 0    | 0         | 0         | 0         | 0         | 0   |
|      | SCAD   | 0   | 0    | 0    | 0    | 0    | 0         | 0         | 0         | 0         | 0   |
|      | MCP    | 0   | 0    | 0    | 0    | 0    | 0         | 0         | 0         | 0         | 0   |
| 31a  | LASSO  | 0   | -    | 0    | -    | 0    | -         | 0         | -         | 0         | 0   |
|      | SCAD   | 0   | -    | 0    | -    | 0    | -         | 0         | -         | 0         | 0   |
|      | MCP    | 0   | -    | 0    | -    | 0    | -         | 0         | -         | 0         | 0   |
| 31b  | LASSO  | 129 | 120  | 0    | 123  | 0    | 0         | 0         | 0         | 0         | 0   |
|      | SCAD   | 153 | 141  | 10   | 145  | 13   | 0         | 0         | 0         | 0         | 11  |
|      | MCP    | 187 | 174  | 25   | 178  | 40   | 0         | 0         | 0         | 0         | 33  |
| 32a  | LASSO  | 0   | -    | 0    | -    | 0    | -         | 0         | -         | 0         | 0   |
|      | SCAD   | 0   | -    | 0    | -    | 0    | -         | 0         | -         | 0         | 0   |
|      | MCP    | 0   | -    | 0    | -    | 0    | -         | 0         | -         | 0         | 0   |
| 32b  | LASSO  | 863 | 756  | 0    | 779  | 0    | 0         | 0         | 0         | 0         | 0   |
|      | SCAD   | 891 | 822  | 421  | 840  | 611  | 0         | 0         | 0         | 0         | 631 |
|      | MCP    | 904 | 839  | 437  | 855  | 606  | 0         | 0         | 0         | 0         | 719 |

Table S28: The results on model selection for  $q = 2.01$ .

| Case | Method | Seq | AIC1 | AIC2 | BIC1 | BIC2 | $L_q$ -A1 | $L_q$ -A2 | $L_q$ -B1 | $L_q$ -B2 | CV  |
|------|--------|-----|------|------|------|------|-----------|-----------|-----------|-----------|-----|
| 1a   | LASSO  | 20  | 0    | 1    | 0    | 1    | 0         | 0         | 0         | 0         | 1   |
|      | SCAD   | 20  | 0    | 1    | 0    | 1    | 0         | 0         | 0         | 0         | 2   |
|      | MCP    | 19  | 0    | 1    | 0    | 1    | 0         | 0         | 0         | 0         | 0   |
| 1b   | LASSO  | 14  | 0    | 2    | 0    | 2    | 0         | 0         | 0         | 0         | 1   |
|      | SCAD   | 14  | 0    | 2    | 0    | 2    | 0         | 0         | 0         | 0         | 3   |
|      | MCP    | 14  | 0    | 0    | 0    | 0    | 0         | 0         | 0         | 0         | 1   |
| 2a   | LASSO  | 112 | 84   | 33   | 82   | 45   | 0         | 0         | 0         | 0         | 17  |
|      | SCAD   | 113 | 86   | 33   | 81   | 44   | 0         | 0         | 0         | 0         | 24  |
|      | MCP    | 112 | 87   | 47   | 81   | 52   | 0         | 0         | 0         | 0         | 32  |
| 2b   | LASSO  | 20  | 1    | 6    | 1    | 6    | 0         | 0         | 0         | 0         | 3   |
|      | SCAD   | 20  | 1    | 6    | 1    | 6    | 0         | 0         | 0         | 0         | 2   |
|      | MCP    | 22  | 1    | 1    | 1    | 2    | 0         | 0         | 0         | 0         | 2   |
| 3a   | LASSO  | 846 | 826  | 57   | 834  | 124  | 0         | 0         | 0         | 0         | 51  |
|      | SCAD   | 845 | 828  | 556  | 835  | 604  | 0         | 0         | 0         | 0         | 450 |
|      | MCP    | 846 | 827  | 616  | 834  | 677  | 0         | 0         | 0         | 0         | 546 |
| 3b   | LASSO  | 502 | 493  | 17   | 492  | 30   | 0         | 0         | 0         | 0         | 41  |
|      | SCAD   | 502 | 493  | 135  | 492  | 143  | 0         | 0         | 0         | 0         | 98  |
|      | MCP    | 504 | 495  | 205  | 494  | 212  | 0         | 0         | 0         | 0         | 182 |
| 4a   | LASSO  | 985 | 962  | 62   | 971  | 122  | 0         | 0         | 0         | 0         | 51  |
|      | SCAD   | 985 | 964  | 821  | 972  | 913  | 0         | 0         | 0         | 0         | 816 |
|      | MCP    | 984 | 965  | 819  | 973  | 904  | 0         | 0         | 0         | 0         | 845 |
| 4b   | LASSO  | 932 | 931  | 24   | 931  | 36   | 0         | 0         | 0         | 0         | 46  |
|      | SCAD   | 932 | 931  | 775  | 931  | 838  | 0         | 0         | 0         | 0         | 686 |
|      | MCP    | 932 | 931  | 792  | 931  | 855  | 0         | 0         | 0         | 0         | 766 |
| 5a   | LASSO  | 0   | -    | 0    | -    | 0    | -         | 0         | -         | 0         | 0   |
|      | SCAD   | 0   | -    | 0    | -    | 0    | -         | 0         | -         | 0         | 0   |
|      | MCP    | 0   | -    | 0    | -    | 0    | -         | 0         | -         | 0         | 0   |
| 5b   | LASSO  | 0   | 0    | 0    | 0    | 0    | 0         | 0         | 0         | 0         | 0   |
|      | SCAD   | 0   | 0    | 0    | 0    | 0    | 0         | 0         | 0         | 0         | 0   |
|      | MCP    | 0   | 0    | 0    | 0    | 0    | 0         | 0         | 0         | 0         | 0   |
| 6a   | LASSO  | 0   | -    | 0    | -    | 0    | -         | 0         | -         | 0         | 0   |
|      | SCAD   | 0   | -    | 0    | -    | 0    | -         | 0         | -         | 0         | 0   |
|      | MCP    | 0   | -    | 0    | -    | 0    | -         | 0         | -         | 0         | 0   |
| 6b   | LASSO  | 0   | 0    | 0    | 0    | 0    | 0         | 0         | 0         | 0         | 0   |
|      | SCAD   | 0   | 0    | 0    | 0    | 0    | 0         | 0         | 0         | 0         | 0   |
|      | MCP    | 0   | 0    | 0    | 0    | 0    | 0         | 0         | 0         | 0         | 0   |
| 7a   | LASSO  | 14  | -    | 0    | -    | 1    | -         | 0         | -         | 0         | 0   |
|      | SCAD   | 421 | -    | 256  | -    | 338  | -         | 38        | -         | 38        | 229 |
|      | MCP    | 521 | -    | 242  | -    | 377  | -         | 38        | -         | 38        | 315 |
| 7b   | LASSO  | 161 | 161  | 0    | 161  | 0    | 0         | 0         | 0         | 0         | 0   |
|      | SCAD   | 165 | 165  | 2    | 165  | 3    | 0         | 0         | 0         | 0         | 1   |
|      | MCP    | 174 | 174  | 10   | 174  | 10   | 0         | 0         | 0         | 0         | 12  |
| 8a   | LASSO  | 49  | -    | 22   | -    | 22   | -         | 22        | -         | 22        | 22  |
|      | SCAD   | 943 | -    | 870  | -    | 902  | -         | 825       | -         | 825       | 894 |
|      | MCP    | 960 | -    | 869  | -    | 901  | -         | 825       | -         | 825       | 916 |
| 8b   | LASSO  | 871 | 871  | 0    | 871  | 0    | 0         | 0         | 0         | 0         | 0   |
|      | SCAD   | 872 | 872  | 541  | 872  | 674  | 0         | 0         | 0         | 0         | 551 |
|      | MCP    | 875 | 875  | 565  | 875  | 708  | 0         | 0         | 0         | 0         | 642 |
| 9a   | LASSO  | 5   | 0    | 0    | 0    | 0    | 0         | 0         | 0         | 0         | 0   |
|      | SCAD   | 3   | 0    | 0    | 0    | 0    | 0         | 0         | 0         | 0         | 0   |
|      | MCP    | 3   | 0    | 0    | 0    | 0    | 0         | 0         | 0         | 0         | 0   |
| 9b   | LASSO  | 1   | 0    | 0    | 0    | 0    | 0         | 0         | 0         | 0         | 0   |
|      | SCAD   | 1   | 0    | 0    | 0    | 0    | 0         | 0         | 0         | 0         | 0   |
|      | MCP    | 1   | 0    | 0    | 0    | 0    | 0         | 0         | 0         | 0         | 0   |

| Case | Method | Seq | AIC1 | AIC2 | BIC1 | BIC2 | $L_q$ -A1 | $L_q$ -A2 | $L_q$ -B1 | $L_q$ -B2 | CV  |
|------|--------|-----|------|------|------|------|-----------|-----------|-----------|-----------|-----|
| 10a  | LASSO  | 56  | 44   | 7    | 43   | 24   | 0         | 0         | 0         | 0         | 9   |
|      | SCAD   | 55  | 45   | 17   | 43   | 22   | 0         | 0         | 0         | 0         | 9   |
|      | MCP    | 54  | 46   | 20   | 44   | 24   | 0         | 0         | 0         | 0         | 9   |
| 10b  | LASSO  | 6   | 0    | 1    | 0    | 1    | 0         | 0         | 0         | 0         | 0   |
|      | SCAD   | 6   | 0    | 1    | 0    | 1    | 0         | 0         | 0         | 0         | 1   |
|      | MCP    | 6   | 0    | 0    | 0    | 0    | 0         | 0         | 0         | 0         | 0   |
| 11a  | LASSO  | 809 | 769  | 27   | 793  | 72   | 0         | 0         | 0         | 0         | 14  |
|      | SCAD   | 809 | 771  | 517  | 792  | 566  | 0         | 0         | 0         | 0         | 433 |
|      | MCP    | 815 | 779  | 574  | 799  | 641  | 0         | 0         | 0         | 0         | 528 |
| 11b  | LASSO  | 453 | 447  | 8    | 447  | 10   | 0         | 0         | 0         | 0         | 9   |
|      | SCAD   | 451 | 445  | 102  | 445  | 107  | 0         | 0         | 0         | 0         | 79  |
|      | MCP    | 448 | 443  | 141  | 443  | 155  | 0         | 0         | 0         | 0         | 141 |
| 12a  | LASSO  | 984 | 937  | 29   | 961  | 74   | 0         | 0         | 0         | 0         | 14  |
|      | SCAD   | 983 | 941  | 783  | 961  | 889  | 0         | 0         | 0         | 0         | 805 |
|      | MCP    | 983 | 940  | 782  | 960  | 890  | 0         | 0         | 0         | 0         | 849 |
| 12b  | LASSO  | 928 | 928  | 8    | 928  | 9    | 0         | 0         | 0         | 0         | 12  |
|      | SCAD   | 929 | 929  | 759  | 929  | 818  | 0         | 0         | 0         | 0         | 691 |
|      | MCP    | 929 | 929  | 778  | 929  | 837  | 0         | 0         | 0         | 0         | 745 |
| 13a  | LASSO  | 0   | -    | 0    | -    | 0    | -         | 0         | -         | 0         | 0   |
|      | SCAD   | 0   | -    | 0    | -    | 0    | -         | 0         | -         | 0         | 0   |
|      | MCP    | 0   | -    | 0    | -    | 0    | -         | 0         | -         | 0         | 0   |
| 13b  | LASSO  | 0   | 0    | 0    | 0    | 0    | 0         | 0         | 0         | 0         | 0   |
|      | SCAD   | 0   | 0    | 0    | 0    | 0    | 0         | 0         | 0         | 0         | 0   |
|      | MCP    | 0   | 0    | 0    | 0    | 0    | 0         | 0         | 0         | 0         | 0   |
| 14a  | LASSO  | 0   | -    | 0    | -    | 0    | -         | 0         | -         | 0         | 0   |
|      | SCAD   | 0   | -    | 0    | -    | 0    | -         | 0         | -         | 0         | 0   |
|      | MCP    | 0   | -    | 0    | -    | 0    | -         | 0         | -         | 0         | 0   |
| 14b  | LASSO  | 0   | 0    | 0    | 0    | 0    | 0         | 0         | 0         | 0         | 0   |
|      | SCAD   | 0   | 0    | 0    | 0    | 0    | 0         | 0         | 0         | 0         | 0   |
|      | MCP    | 0   | 0    | 0    | 0    | 0    | 0         | 0         | 0         | 0         | 0   |
| 15a  | LASSO  | 0   | -    | 0    | -    | 0    | -         | 0         | -         | 0         | 0   |
|      | SCAD   | 222 | -    | 177  | -    | 210  | -         | 112       | -         | 113       | 96  |
|      | MCP    | 275 | -    | 176  | -    | 232  | -         | 124       | -         | 126       | 125 |
| 15b  | LASSO  | 125 | 124  | 0    | 124  | 0    | 0         | 0         | 0         | 0         | 0   |
|      | SCAD   | 123 | 123  | 0    | 123  | 2    | 0         | 0         | 0         | 0         | 1   |
|      | MCP    | 144 | 144  | 9    | 144  | 12   | 0         | 0         | 0         | 0         | 11  |
| 16a  | LASSO  | 0   | -    | 0    | -    | 0    | -         | 0         | -         | 0         | 0   |
|      | SCAD   | 739 | -    | 735  | -    | 737  | -         | 725       | -         | 725       | 640 |
|      | MCP    | 818 | -    | 807  | -    | 810  | -         | 798       | -         | 798       | 757 |
| 16b  | LASSO  | 842 | 838  | 0    | 839  | 0    | 0         | 0         | 0         | 0         | 0   |
|      | SCAD   | 848 | 845  | 526  | 846  | 668  | 0         | 0         | 0         | 0         | 556 |
|      | MCP    | 863 | 860  | 540  | 861  | 691  | 0         | 0         | 0         | 0         | 645 |
| 17a  | LASSO  | 4   | 0    | 0    | 0    | 0    | 0         | 0         | 0         | 0         | 0   |
|      | SCAD   | 5   | 0    | 0    | 0    | 0    | 0         | 0         | 0         | 0         | 0   |
|      | MCP    | 5   | 0    | 0    | 0    | 0    | 0         | 0         | 0         | 0         | 0   |
| 17b  | LASSO  | 3   | 0    | 0    | 0    | 0    | 0         | 0         | 0         | 0         | 0   |
|      | SCAD   | 2   | 0    | 0    | 0    | 0    | 0         | 0         | 0         | 0         | 0   |
|      | MCP    | 1   | 0    | 0    | 0    | 0    | 0         | 0         | 0         | 0         | 0   |
| 18a  | LASSO  | 51  | 36   | 6    | 37   | 10   | 0         | 0         | 0         | 0         | 10  |
|      | SCAD   | 56  | 39   | 5    | 40   | 10   | 0         | 0         | 0         | 0         | 5   |
|      | MCP    | 60  | 43   | 10   | 43   | 17   | 0         | 0         | 0         | 0         | 7   |
| 18b  | LASSO  | 4   | 1    | 0    | 1    | 0    | 0         | 0         | 0         | 0         | 0   |
|      | SCAD   | 4   | 1    | 0    | 1    | 0    | 0         | 0         | 0         | 0         | 0   |
|      | MCP    | 5   | 1    | 0    | 1    | 0    | 0         | 0         | 0         | 0         | 0   |
| 19a  | LASSO  | 798 | 732  | 31   | 775  | 57   | 0         | 0         | 0         | 0         | 17  |
|      | SCAD   | 797 | 740  | 515  | 774  | 584  | 0         | 0         | 0         | 0         | 475 |
|      | MCP    | 810 | 754  | 565  | 788  | 651  | 0         | 0         | 0         | 0         | 556 |
| 19b  | LASSO  | 448 | 441  | 12   | 441  | 19   | 0         | 0         | 0         | 0         | 12  |
|      | SCAD   | 449 | 442  | 123  | 442  | 133  | 0         | 0         | 0         | 0         | 113 |
|      | MCP    | 453 | 445  | 163  | 445  | 179  | 0         | 0         | 0         | 0         | 154 |

| Case | Method | Seq | AIC1 | AIC2 | BIC1 | BIC2 | $L_q$ -A1 | $L_q$ -A2 | $L_q$ -B1 | $L_q$ -B2 | CV  |
|------|--------|-----|------|------|------|------|-----------|-----------|-----------|-----------|-----|
| 20a  | LASSO  | 977 | 891  | 31   | 937  | 60   | 0         | 0         | 0         | 0         | 17  |
|      | SCAD   | 975 | 896  | 766  | 936  | 883  | 1         | 1         | 1         | 2         | 808 |
|      | MCP    | 979 | 898  | 747  | 939  | 886  | 1         | 1         | 1         | 2         | 859 |
| 20b  | LASSO  | 934 | 931  | 16   | 933  | 25   | 0         | 0         | 0         | 0         | 11  |
|      | SCAD   | 936 | 932  | 730  | 935  | 828  | 0         | 0         | 0         | 0         | 702 |
|      | MCP    | 936 | 932  | 748  | 935  | 843  | 0         | 0         | 0         | 0         | 766 |
| 21a  | LASSO  | 0   | -    | 0    | -    | 0    | -         | 0         | -         | 0         | 0   |
|      | SCAD   | 0   | -    | 0    | -    | 0    | -         | 0         | -         | 0         | 0   |
|      | MCP    | 0   | -    | 0    | -    | 0    | -         | 0         | -         | 0         | 0   |
| 21b  | LASSO  | 0   | 0    | 0    | 0    | 0    | 0         | 0         | 0         | 0         | 0   |
|      | SCAD   | 0   | 0    | 0    | 0    | 0    | 0         | 0         | 0         | 0         | 0   |
|      | MCP    | 0   | 0    | 0    | 0    | 0    | 0         | 0         | 0         | 0         | 0   |
| 22a  | LASSO  | 0   | -    | 0    | -    | 0    | -         | 0         | -         | 0         | 0   |
|      | SCAD   | 0   | -    | 0    | -    | 0    | -         | 0         | -         | 0         | 0   |
|      | MCP    | 0   | -    | 0    | -    | 0    | -         | 0         | -         | 0         | 0   |
| 22b  | LASSO  | 0   | 0    | 0    | 0    | 0    | 0         | 0         | 0         | 0         | 0   |
|      | SCAD   | 0   | 0    | 0    | 0    | 0    | 0         | 0         | 0         | 0         | 0   |
|      | MCP    | 0   | 0    | 0    | 0    | 0    | 0         | 0         | 0         | 0         | 0   |
| 23a  | LASSO  | 0   | -    | 0    | -    | 0    | -         | 0         | -         | 0         | 0   |
|      | SCAD   | 0   | -    | 0    | -    | 0    | -         | 0         | -         | 0         | 0   |
|      | MCP    | 3   | -    | 3    | -    | 3    | -         | 3         | -         | 3         | 0   |
| 23b  | LASSO  | 93  | 89   | 0    | 92   | 0    | 0         | 0         | 0         | 0         | 0   |
|      | SCAD   | 94  | 92   | 3    | 94   | 5    | 0         | 0         | 0         | 0         | 2   |
|      | MCP    | 134 | 131  | 13   | 134  | 15   | 0         | 0         | 0         | 0         | 12  |
| 24a  | LASSO  | 0   | -    | 0    | -    | 0    | -         | 0         | -         | 0         | 0   |
|      | SCAD   | 1   | -    | 1    | -    | 1    | -         | 1         | -         | 1         | 0   |
|      | MCP    | 3   | -    | 3    | -    | 3    | -         | 3         | -         | 3         | 0   |
| 24b  | LASSO  | 833 | 790  | 0    | 808  | 0    | 0         | 0         | 0         | 0         | 0   |
|      | SCAD   | 838 | 819  | 494  | 826  | 668  | 0         | 0         | 0         | 0         | 554 |
|      | MCP    | 856 | 838  | 506  | 844  | 671  | 0         | 0         | 0         | 0         | 651 |
| 25a  | LASSO  | 18  | 0    | 0    | 0    | 0    | 0         | 0         | 1         | 0         | 0   |
|      | SCAD   | 20  | 0    | 0    | 0    | 0    | 0         | 0         | 1         | 0         | 0   |
|      | MCP    | 22  | 0    | 0    | 0    | 0    | 0         | 0         | 1         | 0         | 0   |
| 25b  | LASSO  | 16  | 0    | 0    | 0    | 0    | 0         | 0         | 1         | 0         | 0   |
|      | SCAD   | 15  | 0    | 0    | 0    | 0    | 0         | 0         | 1         | 1         | 0   |
|      | MCP    | 15  | 0    | 0    | 0    | 0    | 0         | 0         | 1         | 1         | 0   |
| 26a  | LASSO  | 83  | 48   | 15   | 44   | 17   | 4         | 1         | 7         | 2         | 10  |
|      | SCAD   | 80  | 49   | 16   | 42   | 17   | 4         | 5         | 7         | 7         | 10  |
|      | MCP    | 81  | 52   | 21   | 43   | 24   | 4         | 4         | 7         | 7         | 9   |
| 26b  | LASSO  | 27  | 1    | 1    | 1    | 0    | 0         | 0         | 3         | 0         | 1   |
|      | SCAD   | 25  | 1    | 0    | 1    | 0    | 0         | 0         | 3         | 2         | 1   |
|      | MCP    | 25  | 1    | 0    | 1    | 1    | 0         | 0         | 3         | 2         | 1   |
| 27a  | LASSO  | 811 | 716  | 76   | 773  | 116  | 4         | 1         | 7         | 2         | 38  |
|      | SCAD   | 811 | 716  | 550  | 772  | 637  | 4         | 5         | 7         | 7         | 524 |
|      | MCP    | 815 | 717  | 581  | 776  | 687  | 4         | 4         | 7         | 7         | 577 |
| 27b  | LASSO  | 479 | 461  | 35   | 466  | 46   | 0         | 0         | 3         | 0         | 24  |
|      | SCAD   | 479 | 459  | 178  | 464  | 197  | 0         | 0         | 3         | 3         | 165 |
|      | MCP    | 478 | 458  | 220  | 463  | 244  | 0         | 0         | 3         | 3         | 204 |
| 28a  | LASSO  | 976 | 848  | 88   | 921  | 132  | 10        | 10        | 10        | 10        | 45  |
|      | SCAD   | 981 | 857  | 755  | 927  | 873  | 10        | 17        | 10        | 23        | 834 |
|      | MCP    | 984 | 860  | 744  | 930  | 872  | 10        | 17        | 10        | 20        | 852 |
| 28b  | LASSO  | 940 | 905  | 50   | 922  | 65   | 2         | 2         | 3         | 2         | 27  |
|      | SCAD   | 938 | 902  | 718  | 920  | 827  | 1         | 2         | 3         | 3         | 735 |
|      | MCP    | 939 | 903  | 724  | 921  | 840  | 1         | 2         | 3         | 3         | 763 |
| 29a  | LASSO  | 0   | -    | 0    | -    | 0    | -         | 0         | -         | 0         | 0   |
|      | SCAD   | 0   | -    | 0    | -    | 0    | -         | 0         | -         | 0         | 0   |
|      | MCP    | 0   | -    | 0    | -    | 0    | -         | 0         | -         | 0         | 0   |
| 29b  | LASSO  | 0   | 0    | 0    | 0    | 0    | 0         | 0         | 0         | 0         | 0   |
|      | SCAD   | 0   | 0    | 0    | 0    | 0    | 0         | 0         | 0         | 0         | 0   |
|      | MCP    | 0   | 0    | 0    | 0    | 0    | 0         | 0         | 0         | 0         | 0   |



| Case | Method | Seq | AIC1 | AIC2 | BIC1 | BIC2 | $L_q$ -A1 | $L_q$ -A2 | $L_q$ -B1 | $L_q$ -B2 | CV  |
|------|--------|-----|------|------|------|------|-----------|-----------|-----------|-----------|-----|
| 30a  | LASSO  | 0   | -    | 0    | -    | 0    | -         | 0         | -         | 0         | 0   |
|      | SCAD   | 0   | -    | 0    | -    | 0    | -         | 0         | -         | 0         | 0   |
|      | MCP    | 0   | -    | 0    | -    | 0    | -         | 0         | -         | 0         | 0   |
| 30b  | LASSO  | 0   | 0    | 0    | 0    | 0    | 0         | 0         | 0         | 0         | 0   |
|      | SCAD   | 0   | 0    | 0    | 0    | 0    | 0         | 0         | 0         | 0         | 0   |
|      | MCP    | 0   | 0    | 0    | 0    | 0    | 0         | 0         | 0         | 0         | 0   |
| 31a  | LASSO  | 0   | -    | 0    | -    | 0    | -         | 0         | -         | 0         | 0   |
|      | SCAD   | 0   | -    | 0    | -    | 0    | -         | 0         | -         | 0         | 0   |
|      | MCP    | 0   | -    | 0    | -    | 0    | -         | 0         | -         | 0         | 0   |
| 31b  | LASSO  | 88  | 78   | 0    | 85   | 0    | 0         | 0         | 0         | 0         | 0   |
|      | SCAD   | 110 | 102  | 3    | 107  | 7    | 0         | 0         | 0         | 0         | 3   |
|      | MCP    | 148 | 138  | 19   | 143  | 26   | 0         | 0         | 0         | 0         | 16  |
| 32a  | LASSO  | 0   | -    | 0    | -    | 0    | -         | 0         | -         | 0         | 0   |
|      | SCAD   | 0   | -    | 0    | -    | 0    | -         | 0         | -         | 0         | 0   |
|      | MCP    | 0   | -    | 0    | -    | 0    | -         | 0         | -         | 0         | 0   |
| 32b  | LASSO  | 825 | 719  | 0    | 757  | 0    | 0         | 0         | 0         | 0         | 0   |
|      | SCAD   | 850 | 784  | 489  | 815  | 669  | 0         | 0         | 0         | 0         | 564 |
|      | MCP    | 864 | 797  | 495  | 827  | 679  | 0         | 0         | 0         | 0         | 673 |

Table S29: The results on model selection for  $q = 2.1$ .

| Case | Method | Seq | AIC1 | AIC2 | BIC1 | BIC2 | $L_q$ -A1 | $L_q$ -A2 | $L_q$ -B1 | $L_q$ -B2 | CV  |
|------|--------|-----|------|------|------|------|-----------|-----------|-----------|-----------|-----|
| 1a   | LASSO  | 24  | 0    | 2    | 0    | 2    | 0         | 0         | 0         | 0         | 0   |
|      | SCAD   | 24  | 0    | 2    | 0    | 2    | 0         | 0         | 0         | 0         | 2   |
|      | MCP    | 24  | 0    | 3    | 0    | 2    | 0         | 0         | 0         | 0         | 0   |
| 1b   | LASSO  | 16  | 0    | 6    | 0    | 5    | 0         | 0         | 0         | 0         | 1   |
|      | SCAD   | 16  | 0    | 6    | 0    | 5    | 0         | 0         | 0         | 0         | 2   |
|      | MCP    | 17  | 0    | 4    | 0    | 3    | 0         | 0         | 0         | 0         | 1   |
| 2a   | LASSO  | 47  | 17   | 14   | 13   | 15   | 0         | 0         | 0         | 0         | 9   |
|      | SCAD   | 45  | 17   | 13   | 13   | 12   | 0         | 0         | 0         | 0         | 13  |
|      | MCP    | 44  | 15   | 15   | 11   | 13   | 0         | 0         | 0         | 0         | 6   |
| 2b   | LASSO  | 17  | 0    | 4    | 0    | 4    | 0         | 0         | 0         | 0         | 2   |
|      | SCAD   | 17  | 0    | 4    | 0    | 4    | 0         | 0         | 0         | 0         | 2   |
|      | MCP    | 17  | 0    | 4    | 0    | 3    | 0         | 0         | 0         | 0         | 1   |
| 3a   | LASSO  | 636 | 608  | 46   | 619  | 81   | 0         | 0         | 0         | 0         | 51  |
|      | SCAD   | 637 | 608  | 271  | 618  | 299  | 0         | 0         | 0         | 0         | 201 |
|      | MCP    | 639 | 611  | 343  | 621  | 385  | 0         | 0         | 0         | 0         | 285 |
| 3b   | LASSO  | 142 | 118  | 11   | 118  | 13   | 0         | 0         | 0         | 0         | 16  |
|      | SCAD   | 142 | 118  | 24   | 118  | 25   | 0         | 0         | 0         | 0         | 16  |
|      | MCP    | 143 | 119  | 34   | 119  | 39   | 0         | 0         | 0         | 0         | 27  |
| 4a   | LASSO  | 930 | 891  | 51   | 903  | 97   | 0         | 0         | 0         | 0         | 52  |
|      | SCAD   | 929 | 891  | 676  | 903  | 786  | 0         | 0         | 0         | 0         | 723 |
|      | MCP    | 930 | 892  | 696  | 904  | 789  | 0         | 0         | 0         | 0         | 783 |
| 4b   | LASSO  | 772 | 759  | 22   | 759  | 27   | 0         | 0         | 0         | 0         | 29  |
|      | SCAD   | 771 | 758  | 427  | 758  | 476  | 0         | 0         | 0         | 0         | 382 |
|      | MCP    | 771 | 758  | 482  | 758  | 531  | 0         | 0         | 0         | 0         | 472 |
| 5a   | LASSO  | 0   | -    | 0    | -    | 0    | -         | 0         | -         | 0         | 0   |
|      | SCAD   | 0   | -    | 0    | -    | 0    | -         | 0         | -         | 0         | 0   |
|      | MCP    | 0   | -    | 0    | -    | 0    | -         | 0         | -         | 0         | 0   |
| 5b   | LASSO  | 0   | 0    | 0    | 0    | 0    | 0         | 0         | 0         | 0         | 0   |
|      | SCAD   | 0   | 0    | 0    | 0    | 0    | 0         | 0         | 0         | 0         | 0   |
|      | MCP    | 0   | 0    | 0    | 0    | 0    | 0         | 0         | 0         | 0         | 0   |
| 6a   | LASSO  | 0   | -    | 0    | -    | 0    | -         | 0         | -         | 0         | 0   |
|      | SCAD   | 0   | -    | 0    | -    | 0    | -         | 0         | -         | 0         | 0   |
|      | MCP    | 0   | -    | 0    | -    | 0    | -         | 0         | -         | 0         | 0   |
| 6b   | LASSO  | 0   | 0    | 0    | 0    | 0    | 0         | 0         | 0         | 0         | 0   |
|      | SCAD   | 0   | 0    | 0    | 0    | 0    | 0         | 0         | 0         | 0         | 0   |
|      | MCP    | 0   | 0    | 0    | 0    | 0    | 0         | 0         | 0         | 0         | 0   |
| 7a   | LASSO  | 3   | -    | 0    | -    | 0    | -         | 0         | -         | 0         | 0   |
|      | SCAD   | 154 | -    | 83   | -    | 117  | -         | 1         | -         | 1         | 64  |
|      | MCP    | 222 | -    | 75   | -    | 139  | -         | 1         | -         | 1         | 114 |
| 7b   | LASSO  | 3   | 3    | 0    | 3    | 0    | 0         | 0         | 0         | 0         | 0   |
|      | SCAD   | 3   | 3    | 0    | 3    | 0    | 0         | 0         | 0         | 0         | 0   |
|      | MCP    | 4   | 4    | 0    | 4    | 0    | 0         | 0         | 0         | 0         | 0   |
| 8a   | LASSO  | 42  | -    | 9    | -    | 9    | -         | 9         | -         | 9         | 9   |
|      | SCAD   | 818 | -    | 691  | -    | 753  | -         | 563       | -         | 563       | 721 |
|      | MCP    | 850 | -    | 671  | -    | 736  | -         | 563       | -         | 563       | 778 |
| 8b   | LASSO  | 556 | 556  | 0    | 556  | 0    | 0         | 0         | 0         | 0         | 0   |
|      | SCAD   | 558 | 558  | 205  | 558  | 264  | 0         | 0         | 0         | 0         | 219 |
|      | MCP    | 560 | 560  | 239  | 560  | 309  | 0         | 0         | 0         | 0         | 300 |
| 9a   | LASSO  | 2   | 0    | 0    | 0    | 0    | 0         | 0         | 0         | 0         | 0   |
|      | SCAD   | 2   | 0    | 0    | 0    | 0    | 0         | 0         | 0         | 0         | 0   |
|      | MCP    | 2   | 0    | 0    | 0    | 0    | 0         | 0         | 0         | 0         | 0   |
| 9b   | LASSO  | 3   | 0    | 1    | 0    | 0    | 0         | 0         | 0         | 0         | 0   |
|      | SCAD   | 3   | 0    | 1    | 0    | 0    | 0         | 0         | 0         | 0         | 0   |
|      | MCP    | 3   | 0    | 1    | 0    | 0    | 0         | 0         | 0         | 0         | 0   |

| Case | Method | Seq | AIC1 | AIC2 | BIC1 | BIC2 | $L_q$ -A1 | $L_q$ -A2 | $L_q$ -B1 | $L_q$ -B2 | CV  |
|------|--------|-----|------|------|------|------|-----------|-----------|-----------|-----------|-----|
| 10a  | LASSO  | 19  | 9    | 5    | 7    | 5    | 0         | 0         | 0         | 0         | 2   |
|      | SCAD   | 20  | 9    | 7    | 7    | 4    | 0         | 0         | 0         | 0         | 3   |
|      | MCP    | 21  | 10   | 6    | 8    | 2    | 0         | 0         | 0         | 0         | 4   |
| 10b  | LASSO  | 2   | 0    | 0    | 0    | 0    | 0         | 0         | 0         | 0         | 0   |
|      | SCAD   | 3   | 0    | 0    | 0    | 0    | 0         | 0         | 0         | 0         | 0   |
|      | MCP    | 3   | 0    | 0    | 0    | 0    | 0         | 0         | 0         | 0         | 0   |
| 11a  | LASSO  | 570 | 528  | 17   | 553  | 44   | 0         | 0         | 0         | 0         | 14  |
|      | SCAD   | 569 | 531  | 248  | 554  | 282  | 0         | 0         | 0         | 0         | 192 |
|      | MCP    | 579 | 541  | 298  | 564  | 351  | 0         | 0         | 0         | 0         | 270 |
| 11b  | LASSO  | 85  | 82   | 0    | 82   | 3    | 0         | 0         | 0         | 0         | 4   |
|      | SCAD   | 87  | 84   | 15   | 84   | 15   | 0         | 0         | 0         | 0         | 8   |
|      | MCP    | 84  | 81   | 21   | 81   | 21   | 0         | 0         | 0         | 0         | 14  |
| 12a  | LASSO  | 922 | 852  | 21   | 881  | 47   | 0         | 0         | 0         | 0         | 14  |
|      | SCAD   | 920 | 861  | 649  | 890  | 758  | 0         | 0         | 0         | 0         | 720 |
|      | MCP    | 923 | 862  | 640  | 892  | 769  | 0         | 0         | 0         | 0         | 783 |
| 12b  | LASSO  | 746 | 743  | 6    | 744  | 11   | 0         | 0         | 0         | 0         | 16  |
|      | SCAD   | 743 | 741  | 405  | 741  | 458  | 0         | 0         | 0         | 0         | 394 |
|      | MCP    | 744 | 743  | 446  | 743  | 501  | 0         | 0         | 0         | 0         | 461 |
| 13a  | LASSO  | 0   | -    | 0    | -    | 0    | -         | 0         | -         | 0         | 0   |
|      | SCAD   | 0   | -    | 0    | -    | 0    | -         | 0         | -         | 0         | 0   |
|      | MCP    | 0   | -    | 0    | -    | 0    | -         | 0         | -         | 0         | 0   |
| 13b  | LASSO  | 0   | 0    | 0    | 0    | 0    | 0         | 0         | 0         | 0         | 0   |
|      | SCAD   | 0   | 0    | 0    | 0    | 0    | 0         | 0         | 0         | 0         | 0   |
|      | MCP    | 0   | 0    | 0    | 0    | 0    | 0         | 0         | 0         | 0         | 0   |
| 14a  | LASSO  | 0   | -    | 0    | -    | 0    | -         | 0         | -         | 0         | 0   |
|      | SCAD   | 0   | -    | 0    | -    | 0    | -         | 0         | -         | 0         | 0   |
|      | MCP    | 0   | -    | 0    | -    | 0    | -         | 0         | -         | 0         | 0   |
| 14b  | LASSO  | 0   | 0    | 0    | 0    | 0    | 0         | 0         | 0         | 0         | 0   |
|      | SCAD   | 0   | 0    | 0    | 0    | 0    | 0         | 0         | 0         | 0         | 0   |
|      | MCP    | 0   | 0    | 0    | 0    | 0    | 0         | 0         | 0         | 0         | 0   |
| 15a  | LASSO  | 0   | -    | 0    | -    | 0    | -         | 0         | -         | 0         | 0   |
|      | SCAD   | 55  | -    | 46   | -    | 53   | -         | 23        | -         | 23        | 20  |
|      | MCP    | 75  | -    | 40   | -    | 58   | -         | 26        | -         | 26        | 27  |
| 15b  | LASSO  | 1   | 1    | 0    | 1    | 0    | 0         | 0         | 0         | 0         | 0   |
|      | SCAD   | 2   | 2    | 0    | 2    | 0    | 0         | 0         | 0         | 0         | 0   |
|      | MCP    | 3   | 3    | 0    | 3    | 0    | 0         | 0         | 0         | 0         | 0   |
| 16a  | LASSO  | 0   | -    | 0    | -    | 0    | -         | 0         | -         | 0         | 0   |
|      | SCAD   | 622 | -    | 598  | -    | 612  | -         | 558       | -         | 558       | 498 |
|      | MCP    | 695 | -    | 637  | -    | 652  | -         | 608       | -         | 608       | 587 |
| 16b  | LASSO  | 522 | 513  | 0    | 514  | 0    | 0         | 0         | 0         | 0         | 0   |
|      | SCAD   | 529 | 525  | 196  | 526  | 274  | 0         | 0         | 0         | 0         | 231 |
|      | MCP    | 545 | 543  | 228  | 544  | 311  | 0         | 0         | 0         | 0         | 295 |
| 17a  | LASSO  | 4   | 0    | 0    | 0    | 0    | 0         | 0         | 0         | 0         | 0   |
|      | SCAD   | 4   | 0    | 0    | 0    | 0    | 0         | 0         | 0         | 0         | 0   |
|      | MCP    | 5   | 0    | 0    | 0    | 0    | 0         | 0         | 0         | 0         | 0   |
| 17b  | LASSO  | 6   | 0    | 0    | 0    | 0    | 0         | 0         | 0         | 0         | 0   |
|      | SCAD   | 6   | 0    | 0    | 0    | 0    | 0         | 0         | 0         | 0         | 0   |
|      | MCP    | 5   | 0    | 0    | 0    | 0    | 0         | 0         | 0         | 0         | 0   |
| 18a  | LASSO  | 12  | 3    | 0    | 4    | 0    | 0         | 0         | 0         | 0         | 1   |
|      | SCAD   | 11  | 3    | 0    | 4    | 0    | 0         | 0         | 0         | 0         | 0   |
|      | MCP    | 13  | 4    | 0    | 5    | 2    | 0         | 0         | 0         | 0         | 2   |
| 18b  | LASSO  | 6   | 0    | 0    | 0    | 0    | 0         | 0         | 0         | 0         | 0   |
|      | SCAD   | 5   | 0    | 0    | 0    | 0    | 0         | 0         | 0         | 0         | 0   |
|      | MCP    | 5   | 0    | 0    | 0    | 0    | 0         | 0         | 0         | 0         | 0   |
| 19a  | LASSO  | 548 | 490  | 21   | 519  | 38   | 0         | 0         | 0         | 0         | 10  |
|      | SCAD   | 557 | 500  | 247  | 525  | 292  | 0         | 0         | 0         | 0         | 221 |
|      | MCP    | 565 | 511  | 293  | 537  | 357  | 0         | 0         | 0         | 0         | 284 |
| 19b  | LASSO  | 95  | 91   | 4    | 92   | 7    | 0         | 0         | 0         | 0         | 5   |
|      | SCAD   | 94  | 88   | 7    | 89   | 9    | 0         | 0         | 0         | 0         | 11  |
|      | MCP    | 95  | 89   | 15   | 90   | 17   | 0         | 0         | 0         | 0         | 14  |

| Case | Method | Seq | AIC1 | AIC2 | BIC1 | BIC2 | $L_q$ -A1 | $L_q$ -A2 | $L_q$ -B1 | $L_q$ -B2 | CV  |
|------|--------|-----|------|------|------|------|-----------|-----------|-----------|-----------|-----|
| 20a  | LASSO  | 921 | 815  | 26   | 864  | 46   | 0         | 0         | 0         | 0         | 14  |
|      | SCAD   | 918 | 827  | 629  | 866  | 752  | 0         | 0         | 0         | 0         | 720 |
|      | MCP    | 922 | 833  | 621  | 871  | 757  | 0         | 0         | 0         | 0         | 776 |
| 20b  | LASSO  | 745 | 728  | 11   | 734  | 14   | 0         | 0         | 0         | 0         | 13  |
|      | SCAD   | 743 | 728  | 384  | 732  | 471  | 0         | 0         | 0         | 0         | 429 |
|      | MCP    | 745 | 730  | 423  | 734  | 518  | 0         | 0         | 0         | 0         | 480 |
| 21a  | LASSO  | 0   | -    | 0    | -    | 0    | -         | 0         | -         | 0         | 0   |
|      | SCAD   | 0   | -    | 0    | -    | 0    | -         | 0         | -         | 0         | 0   |
|      | MCP    | 0   | -    | 0    | -    | 0    | -         | 0         | -         | 0         | 0   |
| 21b  | LASSO  | 0   | 0    | 0    | 0    | 0    | 0         | 0         | 0         | 0         | 0   |
|      | SCAD   | 0   | 0    | 0    | 0    | 0    | 0         | 0         | 0         | 0         | 0   |
|      | MCP    | 0   | 0    | 0    | 0    | 0    | 0         | 0         | 0         | 0         | 0   |
| 22a  | LASSO  | 0   | -    | 0    | -    | 0    | -         | 0         | -         | 0         | 0   |
|      | SCAD   | 0   | -    | 0    | -    | 0    | -         | 0         | -         | 0         | 0   |
|      | MCP    | 0   | -    | 0    | -    | 0    | -         | 0         | -         | 0         | 0   |
| 22b  | LASSO  | 0   | 0    | 0    | 0    | 0    | 0         | 0         | 0         | 0         | 0   |
|      | SCAD   | 0   | 0    | 0    | 0    | 0    | 0         | 0         | 0         | 0         | 0   |
|      | MCP    | 0   | 0    | 0    | 0    | 0    | 0         | 0         | 0         | 0         | 0   |
| 23a  | LASSO  | 0   | -    | 0    | -    | 0    | -         | 0         | -         | 0         | 0   |
|      | SCAD   | 0   | -    | 0    | -    | 0    | -         | 0         | -         | 0         | 0   |
|      | MCP    | 0   | -    | 0    | -    | 0    | -         | 0         | -         | 0         | 0   |
| 23b  | LASSO  | 0   | 0    | 0    | 0    | 0    | 0         | 0         | 0         | 0         | 0   |
|      | SCAD   | 0   | 0    | 0    | 0    | 0    | 0         | 0         | 0         | 0         | 0   |
|      | MCP    | 1   | 1    | 0    | 1    | 0    | 0         | 0         | 0         | 0         | 0   |
| 24a  | LASSO  | 0   | -    | 0    | -    | 0    | -         | 0         | -         | 0         | 0   |
|      | SCAD   | 1   | -    | 1    | -    | 1    | -         | 1         | -         | 1         | 0   |
|      | MCP    | 3   | -    | 3    | -    | 3    | -         | 3         | -         | 3         | 0   |
| 24b  | LASSO  | 493 | 464  | 0    | 474  | 0    | 0         | 0         | 0         | 0         | 0   |
|      | SCAD   | 510 | 489  | 172  | 498  | 272  | 0         | 0         | 0         | 0         | 224 |
|      | MCP    | 536 | 510  | 195  | 518  | 300  | 0         | 0         | 0         | 0         | 295 |
| 25a  | LASSO  | 20  | 0    | 0    | 0    | 0    | 1         | 0         | 3         | 0         | 0   |
|      | SCAD   | 20  | 0    | 0    | 0    | 0    | 0         | 1         | 3         | 2         | 0   |
|      | MCP    | 20  | 0    | 0    | 0    | 0    | 0         | 1         | 3         | 2         | 0   |
| 25b  | LASSO  | 14  | 0    | 0    | 0    | 0    | 0         | 0         | 0         | 0         | 0   |
|      | SCAD   | 13  | 0    | 0    | 0    | 0    | 0         | 0         | 0         | 0         | 0   |
|      | MCP    | 13  | 0    | 0    | 0    | 0    | 0         | 0         | 0         | 0         | 0   |
| 26a  | LASSO  | 32  | 6    | 2    | 4    | 3    | 0         | 0         | 3         | 0         | 4   |
|      | SCAD   | 32  | 4    | 3    | 3    | 2    | 0         | 0         | 3         | 2         | 0   |
|      | MCP    | 29  | 5    | 3    | 4    | 4    | 0         | 0         | 3         | 2         | 0   |
| 26b  | LASSO  | 17  | 0    | 0    | 0    | 0    | 0         | 0         | 0         | 0         | 0   |
|      | SCAD   | 15  | 0    | 0    | 0    | 0    | 0         | 0         | 0         | 0         | 0   |
|      | MCP    | 15  | 0    | 0    | 0    | 0    | 0         | 0         | 0         | 0         | 0   |
| 27a  | LASSO  | 582 | 502  | 52   | 545  | 79   | 1         | 0         | 5         | 0         | 39  |
|      | SCAD   | 581 | 498  | 298  | 535  | 360  | 1         | 2         | 5         | 5         | 288 |
|      | MCP    | 592 | 507  | 333  | 545  | 413  | 1         | 2         | 5         | 5         | 339 |
| 27b  | LASSO  | 132 | 103  | 11   | 106  | 15   | 0         | 0         | 0         | 0         | 16  |
|      | SCAD   | 132 | 102  | 15   | 105  | 17   | 0         | 0         | 0         | 0         | 19  |
|      | MCP    | 132 | 102  | 24   | 105  | 27   | 0         | 0         | 0         | 0         | 22  |
| 28a  | LASSO  | 924 | 780  | 72   | 854  | 108  | 8         | 8         | 9         | 8         | 41  |
|      | SCAD   | 925 | 777  | 594  | 846  | 753  | 8         | 8         | 8         | 9         | 741 |
|      | MCP    | 926 | 778  | 597  | 847  | 757  | 8         | 8         | 8         | 9         | 786 |
| 28b  | LASSO  | 758 | 721  | 33   | 732  | 39   | 0         | 0         | 0         | 0         | 19  |
|      | SCAD   | 759 | 720  | 404  | 730  | 500  | 0         | 0         | 0         | 0         | 462 |
|      | MCP    | 761 | 721  | 433  | 731  | 536  | 0         | 0         | 0         | 0         | 519 |
| 29a  | LASSO  | 0   | -    | 0    | -    | 0    | -         | 0         | -         | 0         | 0   |
|      | SCAD   | 0   | -    | 0    | -    | 0    | -         | 0         | -         | 0         | 0   |
|      | MCP    | 0   | -    | 0    | -    | 0    | -         | 0         | -         | 0         | 0   |
| 29b  | LASSO  | 0   | 0    | 0    | 0    | 0    | 0         | 0         | 0         | 0         | 0   |
|      | SCAD   | 0   | 0    | 0    | 0    | 0    | 0         | 0         | 0         | 0         | 0   |
|      | MCP    | 0   | 0    | 0    | 0    | 0    | 0         | 0         | 0         | 0         | 0   |

| Case | Method | Seq | AIC1 | AIC2 | BIC1 | BIC2 | $L_q$ -A1 | $L_q$ -A2 | $L_q$ -B1 | $L_q$ -B2 | CV  |
|------|--------|-----|------|------|------|------|-----------|-----------|-----------|-----------|-----|
| 30a  | LASSO  | 0   | -    | 0    | -    | 0    | -         | 0         | -         | 0         | 0   |
|      | SCAD   | 0   | -    | 0    | -    | 0    | -         | 0         | -         | 0         | 0   |
|      | MCP    | 0   | -    | 0    | -    | 0    | -         | 0         | -         | 0         | 0   |
| 30b  | LASSO  | 0   | 0    | 0    | 0    | 0    | 0         | 0         | 0         | 0         | 0   |
|      | SCAD   | 0   | 0    | 0    | 0    | 0    | 0         | 0         | 0         | 0         | 0   |
|      | MCP    | 0   | 0    | 0    | 0    | 0    | 0         | 0         | 0         | 0         | 0   |
| 31a  | LASSO  | 0   | -    | 0    | -    | 0    | -         | 0         | -         | 0         | 0   |
|      | SCAD   | 0   | -    | 0    | -    | 0    | -         | 0         | -         | 0         | 0   |
|      | MCP    | 0   | -    | 0    | -    | 0    | -         | 0         | -         | 0         | 0   |
| 31b  | LASSO  | 0   | 0    | 0    | 0    | 0    | 0         | 0         | 0         | 0         | 0   |
|      | SCAD   | 0   | 0    | 0    | 0    | 0    | 0         | 0         | 0         | 0         | 0   |
|      | MCP    | 1   | 1    | 0    | 1    | 0    | 0         | 0         | 0         | 0         | 0   |
| 32a  | LASSO  | 0   | -    | 0    | -    | 0    | -         | 0         | -         | 0         | 0   |
|      | SCAD   | 0   | -    | 0    | -    | 0    | -         | 0         | -         | 0         | 0   |
|      | MCP    | 0   | -    | 0    | -    | 0    | -         | 0         | -         | 0         | 0   |
| 32b  | LASSO  | 477 | 391  | 0    | 422  | 0    | 0         | 0         | 0         | 0         | 0   |
|      | SCAD   | 513 | 462  | 195  | 472  | 299  | 0         | 0         | 0         | 0         | 262 |
|      | MCP    | 551 | 504  | 220  | 513  | 319  | 0         | 0         | 0         | 0         | 322 |

Table S30: The results on model selection for  $q = 2.5$ .

| Case | Method | Seq | AIC1 | AIC2 | BIC1 | BIC2 | $L_q$ -A1 | $L_q$ -A2 | $L_q$ -B1 | $L_q$ -B2 | CV |
|------|--------|-----|------|------|------|------|-----------|-----------|-----------|-----------|----|
| 1a   | LASSO  | 25  | 1    | 8    | 0    | 8    | 0         | 0         | 0         | 0         | 0  |
|      | SCAD   | 25  | 1    | 8    | 0    | 8    | 0         | 0         | 0         | 0         | 0  |
|      | MCP    | 25  | 1    | 6    | 0    | 6    | 0         | 0         | 0         | 0         | 0  |
| 1b   | LASSO  | 20  | 1    | 7    | 1    | 8    | 0         | 0         | 0         | 0         | 1  |
|      | SCAD   | 20  | 1    | 8    | 1    | 9    | 0         | 0         | 0         | 0         | 0  |
|      | MCP    | 21  | 1    | 12   | 1    | 11   | 0         | 0         | 0         | 0         | 0  |
| 2a   | LASSO  | 25  | 1    | 7    | 0    | 7    | 0         | 0         | 0         | 0         | 0  |
|      | SCAD   | 25  | 1    | 7    | 0    | 7    | 0         | 0         | 0         | 0         | 0  |
|      | MCP    | 25  | 1    | 6    | 0    | 6    | 0         | 0         | 0         | 0         | 0  |
| 2b   | LASSO  | 20  | 1    | 7    | 1    | 8    | 0         | 0         | 0         | 0         | 1  |
|      | SCAD   | 20  | 1    | 8    | 1    | 9    | 0         | 0         | 0         | 0         | 0  |
|      | MCP    | 21  | 1    | 12   | 1    | 11   | 0         | 0         | 0         | 0         | 0  |
| 3a   | LASSO  | 25  | 1    | 7    | 0    | 7    | 0         | 0         | 0         | 0         | 0  |
|      | SCAD   | 25  | 1    | 7    | 0    | 7    | 0         | 0         | 0         | 0         | 0  |
|      | MCP    | 26  | 1    | 6    | 0    | 6    | 0         | 0         | 0         | 0         | 0  |
| 3b   | LASSO  | 20  | 1    | 7    | 1    | 8    | 0         | 0         | 0         | 0         | 1  |
|      | SCAD   | 20  | 1    | 8    | 1    | 9    | 0         | 0         | 0         | 0         | 0  |
|      | MCP    | 21  | 1    | 12   | 1    | 11   | 0         | 0         | 0         | 0         | 0  |
| 4a   | LASSO  | 32  | 10   | 7    | 9    | 7    | 0         | 0         | 0         | 0         | 3  |
|      | SCAD   | 32  | 10   | 7    | 9    | 7    | 0         | 0         | 0         | 0         | 1  |
|      | MCP    | 32  | 9    | 9    | 8    | 10   | 0         | 0         | 0         | 0         | 4  |
| 4b   | LASSO  | 20  | 1    | 7    | 1    | 8    | 0         | 0         | 0         | 0         | 1  |
|      | SCAD   | 20  | 1    | 8    | 1    | 9    | 0         | 0         | 0         | 0         | 0  |
|      | MCP    | 21  | 1    | 12   | 1    | 12   | 0         | 0         | 0         | 0         | 0  |
| 5a   | LASSO  | 0   | -    | 0    | -    | 0    | -         | 0         | -         | 0         | 0  |
|      | SCAD   | 0   | -    | 0    | -    | 0    | -         | 0         | -         | 0         | 0  |
|      | MCP    | 0   | -    | 0    | -    | 0    | -         | 0         | -         | 0         | 0  |
| 5b   | LASSO  | 0   | 0    | 0    | 0    | 0    | 0         | 0         | 0         | 0         | 0  |
|      | SCAD   | 0   | 0    | 0    | 0    | 0    | 0         | 0         | 0         | 0         | 0  |
|      | MCP    | 0   | 0    | 0    | 0    | 0    | 0         | 0         | 0         | 0         | 0  |
| 6a   | LASSO  | 0   | -    | 0    | -    | 0    | -         | 0         | -         | 0         | 0  |
|      | SCAD   | 0   | -    | 0    | -    | 0    | -         | 0         | -         | 0         | 0  |
|      | MCP    | 0   | -    | 0    | -    | 0    | -         | 0         | -         | 0         | 0  |
| 6b   | LASSO  | 0   | 0    | 0    | 0    | 0    | 0         | 0         | 0         | 0         | 0  |
|      | SCAD   | 0   | 0    | 0    | 0    | 0    | 0         | 0         | 0         | 0         | 0  |
|      | MCP    | 0   | 0    | 0    | 0    | 0    | 0         | 0         | 0         | 0         | 0  |
| 7a   | LASSO  | 0   | -    | 0    | -    | 0    | -         | 0         | -         | 0         | 0  |
|      | SCAD   | 0   | -    | 0    | -    | 0    | -         | 0         | -         | 0         | 0  |
|      | MCP    | 0   | -    | 0    | -    | 0    | -         | 0         | -         | 0         | 0  |
| 7b   | LASSO  | 0   | 0    | 0    | 0    | 0    | 0         | 0         | 0         | 0         | 0  |
|      | SCAD   | 0   | 0    | 0    | 0    | 0    | 0         | 0         | 0         | 0         | 0  |
|      | MCP    | 0   | 0    | 0    | 0    | 0    | 0         | 0         | 0         | 0         | 0  |
| 8a   | LASSO  | 0   | -    | 0    | -    | 0    | -         | 0         | -         | 0         | 0  |
|      | SCAD   | 0   | -    | 0    | -    | 0    | -         | 0         | -         | 0         | 0  |
|      | MCP    | 0   | -    | 0    | -    | 0    | -         | 0         | -         | 0         | 0  |
| 8b   | LASSO  | 0   | 0    | 0    | 0    | 0    | 0         | 0         | 0         | 0         | 0  |
|      | SCAD   | 0   | 0    | 0    | 0    | 0    | 0         | 0         | 0         | 0         | 0  |
|      | MCP    | 0   | 0    | 0    | 0    | 0    | 0         | 0         | 0         | 0         | 0  |
| 9a   | LASSO  | 3   | 0    | 0    | 0    | 0    | 0         | 0         | 0         | 0         | 0  |
|      | SCAD   | 3   | 0    | 0    | 0    | 0    | 0         | 0         | 0         | 0         | 0  |
|      | MCP    | 3   | 0    | 0    | 0    | 0    | 0         | 0         | 0         | 0         | 0  |
| 9b   | LASSO  | 3   | 0    | 0    | 0    | 0    | 0         | 0         | 0         | 0         | 0  |
|      | SCAD   | 3   | 0    | 0    | 0    | 0    | 0         | 0         | 0         | 0         | 0  |
|      | MCP    | 3   | 0    | 0    | 0    | 0    | 0         | 0         | 0         | 0         | 0  |

| Case | Method | Seq | AIC1 | AIC2 | BIC1 | BIC2 | $L_q$ -A1 | $L_q$ -A2 | $L_q$ -B1 | $L_q$ -B2 | CV |
|------|--------|-----|------|------|------|------|-----------|-----------|-----------|-----------|----|
| 10a  | LASSO  | 3   | 0    | 0    | 0    | 0    | 0         | 0         | 0         | 0         | 0  |
|      | SCAD   | 3   | 0    | 0    | 0    | 0    | 0         | 0         | 0         | 0         | 0  |
|      | MCP    | 3   | 0    | 0    | 0    | 0    | 0         | 0         | 0         | 0         | 0  |
| 10b  | LASSO  | 3   | 0    | 0    | 0    | 0    | 0         | 0         | 0         | 0         | 0  |
|      | SCAD   | 3   | 0    | 0    | 0    | 0    | 0         | 0         | 0         | 0         | 0  |
|      | MCP    | 3   | 0    | 0    | 0    | 0    | 0         | 0         | 0         | 0         | 0  |
| 11a  | LASSO  | 3   | 0    | 0    | 0    | 0    | 0         | 0         | 0         | 0         | 0  |
|      | SCAD   | 3   | 0    | 0    | 0    | 0    | 0         | 0         | 0         | 0         | 0  |
|      | MCP    | 3   | 0    | 0    | 0    | 0    | 0         | 0         | 0         | 0         | 0  |
| 11b  | LASSO  | 3   | 0    | 0    | 0    | 0    | 0         | 0         | 0         | 0         | 0  |
|      | SCAD   | 3   | 0    | 0    | 0    | 0    | 0         | 0         | 0         | 0         | 0  |
|      | MCP    | 3   | 0    | 0    | 0    | 0    | 0         | 0         | 0         | 0         | 0  |
| 12a  | LASSO  | 10  | 7    | 0    | 7    | 0    | 0         | 0         | 0         | 0         | 0  |
|      | SCAD   | 10  | 7    | 1    | 7    | 1    | 0         | 0         | 0         | 0         | 0  |
|      | MCP    | 11  | 7    | 1    | 7    | 2    | 0         | 0         | 0         | 0         | 0  |
| 12b  | LASSO  | 3   | 0    | 0    | 0    | 0    | 0         | 0         | 0         | 0         | 0  |
|      | SCAD   | 3   | 0    | 0    | 0    | 0    | 0         | 0         | 0         | 0         | 0  |
|      | MCP    | 3   | 0    | 0    | 0    | 0    | 0         | 0         | 0         | 0         | 0  |
| 13a  | LASSO  | 0   | -    | 0    | -    | 0    | -         | 0         | -         | 0         | 0  |
|      | SCAD   | 0   | -    | 0    | -    | 0    | -         | 0         | -         | 0         | 0  |
|      | MCP    | 0   | -    | 0    | -    | 0    | -         | 0         | -         | 0         | 0  |
| 13b  | LASSO  | 0   | 0    | 0    | 0    | 0    | 0         | 0         | 0         | 0         | 0  |
|      | SCAD   | 0   | 0    | 0    | 0    | 0    | 0         | 0         | 0         | 0         | 0  |
|      | MCP    | 0   | 0    | 0    | 0    | 0    | 0         | 0         | 0         | 0         | 0  |
| 14a  | LASSO  | 0   | -    | 0    | -    | 0    | -         | 0         | -         | 0         | 0  |
|      | SCAD   | 0   | -    | 0    | -    | 0    | -         | 0         | -         | 0         | 0  |
|      | MCP    | 0   | -    | 0    | -    | 0    | -         | 0         | -         | 0         | 0  |
| 14b  | LASSO  | 0   | 0    | 0    | 0    | 0    | 0         | 0         | 0         | 0         | 0  |
|      | SCAD   | 0   | 0    | 0    | 0    | 0    | 0         | 0         | 0         | 0         | 0  |
|      | MCP    | 0   | 0    | 0    | 0    | 0    | 0         | 0         | 0         | 0         | 0  |
| 15a  | LASSO  | 0   | -    | 0    | -    | 0    | -         | 0         | -         | 0         | 0  |
|      | SCAD   | 0   | -    | 0    | -    | 0    | -         | 0         | -         | 0         | 0  |
|      | MCP    | 0   | -    | 0    | -    | 0    | -         | 0         | -         | 0         | 0  |
| 15b  | LASSO  | 0   | 0    | 0    | 0    | 0    | 0         | 0         | 0         | 0         | 0  |
|      | SCAD   | 0   | 0    | 0    | 0    | 0    | 0         | 0         | 0         | 0         | 0  |
|      | MCP    | 0   | 0    | 0    | 0    | 0    | 0         | 0         | 0         | 0         | 0  |
| 16a  | LASSO  | 0   | -    | 0    | -    | 0    | -         | 0         | -         | 0         | 0  |
|      | SCAD   | 0   | -    | 0    | -    | 0    | -         | 0         | -         | 0         | 0  |
|      | MCP    | 0   | -    | 0    | -    | 0    | -         | 0         | -         | 0         | 0  |
| 16b  | LASSO  | 0   | 0    | 0    | 0    | 0    | 0         | 0         | 0         | 0         | 0  |
|      | SCAD   | 0   | 0    | 0    | 0    | 0    | 0         | 0         | 0         | 0         | 0  |
|      | MCP    | 0   | 0    | 0    | 0    | 0    | 0         | 0         | 0         | 0         | 0  |
| 17a  | LASSO  | 3   | 0    | 0    | 0    | 0    | 0         | 0         | 0         | 0         | 0  |
|      | SCAD   | 4   | 0    | 0    | 0    | 0    | 0         | 0         | 0         | 0         | 0  |
|      | MCP    | 4   | 0    | 0    | 0    | 0    | 0         | 0         | 0         | 0         | 0  |
| 17b  | LASSO  | 5   | 0    | 1    | 0    | 1    | 0         | 0         | 0         | 0         | 0  |
|      | SCAD   | 5   | 0    | 1    | 0    | 1    | 0         | 0         | 0         | 0         | 0  |
|      | MCP    | 5   | 0    | 0    | 0    | 0    | 0         | 0         | 0         | 0         | 0  |
| 18a  | LASSO  | 3   | 0    | 0    | 0    | 0    | 0         | 0         | 0         | 0         | 0  |
|      | SCAD   | 4   | 0    | 0    | 0    | 0    | 0         | 0         | 0         | 0         | 0  |
|      | MCP    | 4   | 0    | 0    | 0    | 0    | 0         | 0         | 0         | 0         | 0  |
| 18b  | LASSO  | 5   | 0    | 1    | 0    | 1    | 0         | 0         | 0         | 0         | 0  |
|      | SCAD   | 5   | 0    | 1    | 0    | 1    | 0         | 0         | 0         | 0         | 0  |
|      | MCP    | 5   | 0    | 0    | 0    | 0    | 0         | 0         | 0         | 0         | 0  |
| 19a  | LASSO  | 3   | 0    | 0    | 0    | 0    | 0         | 0         | 0         | 0         | 0  |
|      | SCAD   | 4   | 0    | 0    | 0    | 0    | 0         | 0         | 0         | 0         | 0  |
|      | MCP    | 4   | 0    | 0    | 0    | 0    | 0         | 0         | 0         | 0         | 0  |
| 19b  | LASSO  | 5   | 0    | 1    | 0    | 1    | 0         | 0         | 0         | 0         | 0  |
|      | SCAD   | 5   | 0    | 1    | 0    | 1    | 0         | 0         | 0         | 0         | 0  |
|      | MCP    | 5   | 0    | 0    | 0    | 0    | 0         | 0         | 0         | 0         | 0  |

| Case | Method | Seq | AIC1 | AIC2 | BIC1 | BIC2 | $L_q$ -A1 | $L_q$ -A2 | $L_q$ -B1 | $L_q$ -B2 | CV |
|------|--------|-----|------|------|------|------|-----------|-----------|-----------|-----------|----|
| 20a  | LASSO  | 9   | 4    | 0    | 4    | 0    | 0         | 0         | 0         | 0         | 0  |
|      | SCAD   | 9   | 4    | 0    | 4    | 0    | 0         | 0         | 0         | 0         | 0  |
|      | MCP    | 9   | 4    | 0    | 4    | 0    | 0         | 0         | 0         | 0         | 0  |
| 20b  | LASSO  | 5   | 0    | 1    | 0    | 1    | 0         | 0         | 0         | 0         | 0  |
|      | SCAD   | 5   | 0    | 1    | 0    | 1    | 0         | 0         | 0         | 0         | 0  |
|      | MCP    | 5   | 0    | 0    | 0    | 0    | 0         | 0         | 0         | 0         | 0  |
| 21a  | LASSO  | 0   | -    | 0    | -    | 0    | -         | 0         | -         | 0         | 0  |
|      | SCAD   | 0   | -    | 0    | -    | 0    | -         | 0         | -         | 0         | 0  |
|      | MCP    | 0   | -    | 0    | -    | 0    | -         | 0         | -         | 0         | 0  |
| 21b  | LASSO  | 0   | 0    | 0    | 0    | 0    | 0         | 0         | 0         | 0         | 0  |
|      | SCAD   | 0   | 0    | 0    | 0    | 0    | 0         | 0         | 0         | 0         | 0  |
|      | MCP    | 0   | 0    | 0    | 0    | 0    | 0         | 0         | 0         | 0         | 0  |
| 22a  | LASSO  | 0   | -    | 0    | -    | 0    | -         | 0         | -         | 0         | 0  |
|      | SCAD   | 0   | -    | 0    | -    | 0    | -         | 0         | -         | 0         | 0  |
|      | MCP    | 0   | -    | 0    | -    | 0    | -         | 0         | -         | 0         | 0  |
| 22b  | LASSO  | 0   | 0    | 0    | 0    | 0    | 0         | 0         | 0         | 0         | 0  |
|      | SCAD   | 0   | 0    | 0    | 0    | 0    | 0         | 0         | 0         | 0         | 0  |
|      | MCP    | 0   | 0    | 0    | 0    | 0    | 0         | 0         | 0         | 0         | 0  |
| 23a  | LASSO  | 0   | -    | 0    | -    | 0    | -         | 0         | -         | 0         | 0  |
|      | SCAD   | 0   | -    | 0    | -    | 0    | -         | 0         | -         | 0         | 0  |
|      | MCP    | 0   | -    | 0    | -    | 0    | -         | 0         | -         | 0         | 0  |
| 23b  | LASSO  | 0   | 0    | 0    | 0    | 0    | 0         | 0         | 0         | 0         | 0  |
|      | SCAD   | 0   | 0    | 0    | 0    | 0    | 0         | 0         | 0         | 0         | 0  |
|      | MCP    | 0   | 0    | 0    | 0    | 0    | 0         | 0         | 0         | 0         | 0  |
| 24a  | LASSO  | 0   | -    | 0    | -    | 0    | -         | 0         | -         | 0         | 0  |
|      | SCAD   | 0   | -    | 0    | -    | 0    | -         | 0         | -         | 0         | 0  |
|      | MCP    | 0   | -    | 0    | -    | 0    | -         | 0         | -         | 0         | 0  |
| 24b  | LASSO  | 0   | 0    | 0    | 0    | 0    | 0         | 0         | 0         | 0         | 0  |
|      | SCAD   | 0   | 0    | 0    | 0    | 0    | 0         | 0         | 0         | 0         | 0  |
|      | MCP    | 0   | 0    | 0    | 0    | 0    | 0         | 0         | 0         | 0         | 0  |
| 25a  | LASSO  | 17  | 0    | 0    | 0    | 0    | 0         | 0         | 0         | 0         | 0  |
|      | SCAD   | 17  | 0    | 0    | 0    | 0    | 0         | 0         | 0         | 0         | 0  |
|      | MCP    | 14  | 0    | 0    | 0    | 0    | 0         | 0         | 0         | 0         | 0  |
| 25b  | LASSO  | 20  | 0    | 0    | 0    | 0    | 0         | 0         | 0         | 0         | 0  |
|      | SCAD   | 23  | 0    | 0    | 0    | 0    | 0         | 0         | 0         | 0         | 0  |
|      | MCP    | 23  | 0    | 0    | 0    | 0    | 0         | 0         | 0         | 0         | 0  |
| 26a  | LASSO  | 17  | 0    | 0    | 0    | 0    | 0         | 0         | 0         | 0         | 0  |
|      | SCAD   | 17  | 0    | 0    | 0    | 0    | 0         | 0         | 0         | 0         | 0  |
|      | MCP    | 14  | 0    | 0    | 0    | 0    | 0         | 0         | 0         | 0         | 0  |
| 26b  | LASSO  | 20  | 0    | 0    | 0    | 0    | 0         | 0         | 0         | 0         | 0  |
|      | SCAD   | 23  | 0    | 0    | 0    | 0    | 0         | 0         | 0         | 0         | 0  |
|      | MCP    | 23  | 0    | 0    | 0    | 0    | 0         | 0         | 0         | 0         | 0  |
| 27a  | LASSO  | 17  | 0    | 0    | 0    | 0    | 0         | 0         | 0         | 0         | 0  |
|      | SCAD   | 17  | 0    | 0    | 0    | 0    | 0         | 0         | 0         | 0         | 0  |
|      | MCP    | 14  | 0    | 0    | 0    | 0    | 0         | 0         | 0         | 0         | 0  |
| 27b  | LASSO  | 20  | 0    | 0    | 0    | 0    | 0         | 0         | 0         | 0         | 0  |
|      | SCAD   | 23  | 0    | 0    | 0    | 0    | 0         | 0         | 0         | 0         | 0  |
|      | MCP    | 23  | 0    | 0    | 0    | 0    | 0         | 0         | 0         | 0         | 0  |
| 28a  | LASSO  | 23  | 3    | 0    | 4    | 0    | 0         | 0         | 0         | 0         | 0  |
|      | SCAD   | 21  | 3    | 0    | 4    | 0    | 0         | 0         | 0         | 0         | 1  |
|      | MCP    | 22  | 3    | 0    | 4    | 1    | 0         | 0         | 0         | 0         | 0  |
| 28b  | LASSO  | 20  | 0    | 0    | 0    | 0    | 0         | 0         | 0         | 0         | 0  |
|      | SCAD   | 23  | 0    | 0    | 0    | 0    | 0         | 0         | 0         | 0         | 0  |
|      | MCP    | 23  | 0    | 0    | 0    | 0    | 0         | 0         | 0         | 0         | 0  |
| 29a  | LASSO  | 0   | -    | 0    | -    | 0    | -         | 0         | -         | 0         | 0  |
|      | SCAD   | 0   | -    | 0    | -    | 0    | -         | 0         | -         | 0         | 0  |
|      | MCP    | 0   | -    | 0    | -    | 0    | -         | 0         | -         | 0         | 0  |
| 29b  | LASSO  | 0   | 0    | 0    | 0    | 0    | 0         | 0         | 0         | 0         | 0  |
|      | SCAD   | 0   | 0    | 0    | 0    | 0    | 0         | 0         | 0         | 0         | 0  |
|      | MCP    | 0   | 0    | 0    | 0    | 0    | 0         | 0         | 0         | 0         | 0  |



| Case | Method | Seq | AIC1 | AIC2 | BIC1 | BIC2 | $L_q$ -A1 | $L_q$ -A2 | $L_q$ -B1 | $L_q$ -B2 | CV |
|------|--------|-----|------|------|------|------|-----------|-----------|-----------|-----------|----|
| 30a  | LASSO  | 0   | -    | 0    | -    | 0    | -         | 0         | -         | 0         | 0  |
|      | SCAD   | 0   | -    | 0    | -    | 0    | -         | 0         | -         | 0         | 0  |
|      | MCP    | 0   | -    | 0    | -    | 0    | -         | 0         | -         | 0         | 0  |
| 30b  | LASSO  | 0   | 0    | 0    | 0    | 0    | 0         | 0         | 0         | 0         | 0  |
|      | SCAD   | 0   | 0    | 0    | 0    | 0    | 0         | 0         | 0         | 0         | 0  |
|      | MCP    | 0   | 0    | 0    | 0    | 0    | 0         | 0         | 0         | 0         | 0  |
| 31a  | LASSO  | 0   | -    | 0    | -    | 0    | -         | 0         | -         | 0         | 0  |
|      | SCAD   | 0   | -    | 0    | -    | 0    | -         | 0         | -         | 0         | 0  |
|      | MCP    | 0   | -    | 0    | -    | 0    | -         | 0         | -         | 0         | 0  |
| 31b  | LASSO  | 0   | 0    | 0    | 0    | 0    | 0         | 0         | 0         | 0         | 0  |
|      | SCAD   | 0   | 0    | 0    | 0    | 0    | 0         | 0         | 0         | 0         | 0  |
|      | MCP    | 0   | 0    | 0    | 0    | 0    | 0         | 0         | 0         | 0         | 0  |
| 32a  | LASSO  | 0   | -    | 0    | -    | 0    | -         | 0         | -         | 0         | 0  |
|      | SCAD   | 0   | -    | 0    | -    | 0    | -         | 0         | -         | 0         | 0  |
|      | MCP    | 0   | -    | 0    | -    | 0    | -         | 0         | -         | 0         | 0  |
| 32b  | LASSO  | 0   | 0    | 0    | 0    | 0    | 0         | 0         | 0         | 0         | 0  |
|      | SCAD   | 0   | 0    | 0    | 0    | 0    | 0         | 0         | 0         | 0         | 0  |
|      | MCP    | 0   | 0    | 0    | 0    | 0    | 0         | 0         | 0         | 0         | 0  |

Table S31: The results on generalization for  $q = 1$  (the normal error). Note that, when  $q = 1$ ,  $L_q$ -criteria are equivalent to the original criteria, respectively.

| Case | Method | AIC1 | AIC2  | BIC1 | BIC2  | $L_q$ -A1 | $L_q$ -A2 | $L_q$ -B1 | $L_q$ -B2 | CV    |
|------|--------|------|-------|------|-------|-----------|-----------|-----------|-----------|-------|
| 1a   | LASSO  | 1.04 | 1.07  | 1.03 | 1.04  | -         | -         | -         | -         | 1.04  |
|      | SCAD   | 1.06 | 1.08  | 1.04 | 1.05  | -         | -         | -         | -         | 1.04  |
|      | MCP    | 1.07 | 1.09  | 1.05 | 1.05  | -         | -         | -         | -         | 1.05  |
| 1b   | LASSO  | 1.00 | 1.01  | 1.00 | 1.00  | -         | -         | -         | -         | 1.00  |
|      | SCAD   | 1.00 | 1.01  | 1.00 | 1.00  | -         | -         | -         | -         | 1.00  |
|      | MCP    | 1.01 | 1.01  | 1.00 | 1.00  | -         | -         | -         | -         | 1.00  |
| 2a   | LASSO  | 1.07 | 1.08  | 1.08 | 1.07  | -         | -         | -         | -         | 1.07  |
|      | SCAD   | 1.06 | 1.08  | 1.04 | 1.05  | -         | -         | -         | -         | 1.04  |
|      | MCP    | 1.07 | 1.09  | 1.05 | 1.05  | -         | -         | -         | -         | 1.04  |
| 2b   | LASSO  | 1.01 | 1.01  | 1.01 | 1.01  | -         | -         | -         | -         | 1.01  |
|      | SCAD   | 1.01 | 1.01  | 1.00 | 1.00  | -         | -         | -         | -         | 1.00  |
|      | MCP    | 1.01 | 1.01  | 1.00 | 1.00  | -         | -         | -         | -         | 1.00  |
| 3a   | LASSO  | 1.07 | 1.08  | 1.08 | 1.07  | -         | -         | -         | -         | 1.07  |
|      | SCAD   | 1.06 | 1.08  | 1.04 | 1.05  | -         | -         | -         | -         | 1.04  |
|      | MCP    | 1.07 | 1.09  | 1.05 | 1.05  | -         | -         | -         | -         | 1.04  |
| 3b   | LASSO  | 1.01 | 1.01  | 1.01 | 1.01  | -         | -         | -         | -         | 1.01  |
|      | SCAD   | 1.01 | 1.01  | 1.00 | 1.00  | -         | -         | -         | -         | 1.00  |
|      | MCP    | 1.01 | 1.01  | 1.00 | 1.00  | -         | -         | -         | -         | 1.00  |
| 4a   | LASSO  | 1.07 | 1.07  | 1.08 | 1.07  | -         | -         | -         | -         | 1.07  |
|      | SCAD   | 1.05 | 1.04  | 1.04 | 1.04  | -         | -         | -         | -         | 1.04  |
|      | MCP    | 1.06 | 1.06  | 1.05 | 1.05  | -         | -         | -         | -         | 1.04  |
| 4b   | LASSO  | 1.01 | 1.01  | 1.01 | 1.01  | -         | -         | -         | -         | 1.01  |
|      | SCAD   | 1.00 | 1.00  | 1.00 | 1.00  | -         | -         | -         | -         | 1.00  |
|      | MCP    | 1.01 | 1.00  | 1.00 | 1.00  | -         | -         | -         | -         | 1.00  |
| 5a   | LASSO  | -    | 1.44  | -    | 1.18  | -         | -         | -         | -         | 1.20  |
|      | SCAD   | -    | 1.79  | -    | 1.42  | -         | -         | -         | -         | 1.19  |
|      | MCP    | -    | 1.76  | -    | 1.49  | -         | -         | -         | -         | 1.20  |
| 5b   | LASSO  | 1.03 | 1.05  | 1.02 | 1.02  | -         | -         | -         | -         | 1.02  |
|      | SCAD   | 1.03 | 1.07  | 1.02 | 1.02  | -         | -         | -         | -         | 1.02  |
|      | MCP    | 1.05 | 1.07  | 1.02 | 1.02  | -         | -         | -         | -         | 1.02  |
| 6a   | LASSO  | -    | 1.55  | -    | 1.56  | -         | -         | -         | -         | 1.55  |
|      | SCAD   | -    | 1.36  | -    | 1.26  | -         | -         | -         | -         | 1.22  |
|      | MCP    | -    | 1.50  | -    | 1.43  | -         | -         | -         | -         | 1.22  |
| 6b   | LASSO  | 1.05 | 1.07  | 1.10 | 1.06  | -         | -         | -         | -         | 1.05  |
|      | SCAD   | 1.04 | 1.07  | 1.02 | 1.03  | -         | -         | -         | -         | 1.02  |
|      | MCP    | 1.05 | 1.07  | 1.02 | 1.02  | -         | -         | -         | -         | 1.02  |
| 7a   | LASSO  | -    | 21.02 | -    | 21.02 | -         | -         | -         | -         | 21.02 |
|      | SCAD   | -    | 1.20  | -    | 1.20  | -         | -         | -         | -         | 1.20  |
|      | MCP    | -    | 1.20  | -    | 1.20  | -         | -         | -         | -         | 1.20  |
| 7b   | LASSO  | 1.05 | 1.07  | 1.10 | 1.06  | -         | -         | -         | -         | 1.05  |
|      | SCAD   | 1.04 | 1.07  | 1.02 | 1.02  | -         | -         | -         | -         | 1.02  |
|      | MCP    | 1.05 | 1.07  | 1.02 | 1.02  | -         | -         | -         | -         | 1.02  |
| 8a   | LASSO  | -    | 1984  | -    | 1984  | -         | -         | -         | -         | 1984  |
|      | SCAD   | -    | 1.20  | -    | 1.20  | -         | -         | -         | -         | 1.20  |
|      | MCP    | -    | 1.20  | -    | 1.20  | -         | -         | -         | -         | 1.20  |
| 8b   | LASSO  | 1.06 | 1.06  | 1.10 | 1.07  | -         | -         | -         | -         | 1.06  |
|      | SCAD   | 1.03 | 1.03  | 1.02 | 1.02  | -         | -         | -         | -         | 1.02  |
|      | MCP    | 1.04 | 1.04  | 1.02 | 1.02  | -         | -         | -         | -         | 1.02  |
| 9a   | LASSO  | 1.05 | 1.08  | 1.05 | 1.06  | -         | -         | -         | -         | 1.06  |
|      | SCAD   | 1.07 | 1.09  | 1.05 | 1.07  | -         | -         | -         | -         | 1.06  |
|      | MCP    | 1.08 | 1.09  | 1.06 | 1.07  | -         | -         | -         | -         | 1.07  |
| 9b   | LASSO  | 1.00 | 1.01  | 1.00 | 1.00  | -         | -         | -         | -         | 1.00  |
|      | SCAD   | 1.01 | 1.01  | 1.00 | 1.01  | -         | -         | -         | -         | 1.01  |
|      | MCP    | 1.01 | 1.01  | 1.00 | 1.01  | -         | -         | -         | -         | 1.01  |

| Case | Method | AIC1 | AIC2 | BIC1 | BIC2 | $L_q$ -A1 | $L_q$ -A2 | $L_q$ -B1 | $L_q$ -B2 | CV    |
|------|--------|------|------|------|------|-----------|-----------|-----------|-----------|-------|
| 10a  | LASSO  | 1.10 | 1.10 | 1.13 | 1.10 | -         | -         | -         | -         | 1.09  |
|      | SCAD   | 1.08 | 1.09 | 1.06 | 1.07 | -         | -         | -         | -         | 1.06  |
|      | MCP    | 1.08 | 1.09 | 1.07 | 1.07 | -         | -         | -         | -         | 1.06  |
| 10b  | LASSO  | 1.01 | 1.01 | 1.01 | 1.01 | -         | -         | -         | -         | 1.01  |
|      | SCAD   | 1.01 | 1.01 | 1.00 | 1.01 | -         | -         | -         | -         | 1.01  |
|      | MCP    | 1.01 | 1.01 | 1.01 | 1.01 | -         | -         | -         | -         | 1.01  |
| 11a  | LASSO  | 1.10 | 1.10 | 1.13 | 1.10 | -         | -         | -         | -         | 1.09  |
|      | SCAD   | 1.07 | 1.09 | 1.06 | 1.07 | -         | -         | -         | -         | 1.06  |
|      | MCP    | 1.08 | 1.09 | 1.07 | 1.07 | -         | -         | -         | -         | 1.06  |
| 11b  | LASSO  | 1.01 | 1.01 | 1.01 | 1.01 | -         | -         | -         | -         | 1.01  |
|      | SCAD   | 1.01 | 1.01 | 1.00 | 1.01 | -         | -         | -         | -         | 1.01  |
|      | MCP    | 1.01 | 1.01 | 1.01 | 1.01 | -         | -         | -         | -         | 1.01  |
| 12a  | LASSO  | 1.12 | 1.11 | 1.14 | 1.12 | -         | -         | -         | -         | 1.11  |
|      | SCAD   | 1.06 | 1.06 | 1.06 | 1.06 | -         | -         | -         | -         | 1.06  |
|      | MCP    | 1.07 | 1.07 | 1.06 | 1.06 | -         | -         | -         | -         | 1.06  |
| 12b  | LASSO  | 1.01 | 1.01 | 1.01 | 1.01 | -         | -         | -         | -         | 1.01  |
|      | SCAD   | 1.01 | 1.01 | 1.00 | 1.00 | -         | -         | -         | -         | 1.00  |
|      | MCP    | 1.01 | 1.01 | 1.01 | 1.01 | -         | -         | -         | -         | 1.01  |
| 13a  | LASSO  | -    | 1.49 | -    | 1.31 | -         | -         | -         | -         | 1.34  |
|      | SCAD   | -    | 1.80 | -    | 1.59 | -         | -         | -         | -         | 1.34  |
|      | MCP    | -    | 1.78 | -    | 1.59 | -         | -         | -         | -         | 1.37  |
| 13b  | LASSO  | 1.04 | 1.06 | 1.04 | 1.04 | -         | -         | -         | -         | 1.04  |
|      | SCAD   | 1.05 | 1.08 | 1.04 | 1.04 | -         | -         | -         | -         | 1.04  |
|      | MCP    | 1.06 | 1.08 | 1.04 | 1.04 | -         | -         | -         | -         | 1.04  |
| 14a  | LASSO  | -    | 2.53 | -    | 2.53 | -         | -         | -         | -         | 2.53  |
|      | SCAD   | -    | 1.87 | -    | 1.86 | -         | -         | -         | -         | 4.67  |
|      | MCP    | -    | 1.74 | -    | 1.73 | -         | -         | -         | -         | 3.51  |
| 14b  | LASSO  | 1.09 | 1.08 | 1.22 | 1.09 | -         | -         | -         | -         | 1.08  |
|      | SCAD   | 1.05 | 1.08 | 1.04 | 1.05 | -         | -         | -         | -         | 1.04  |
|      | MCP    | 1.06 | 1.08 | 1.04 | 1.04 | -         | -         | -         | -         | 1.04  |
| 15a  | LASSO  | -    | 99.2 | -    | 99.2 | -         | -         | -         | -         | 99.2  |
|      | SCAD   | -    | 16.5 | -    | 16.5 | -         | -         | -         | -         | 103.6 |
|      | MCP    | -    | 7.88 | -    | 7.88 | -         | -         | -         | -         | 30.3  |
| 15b  | LASSO  | 1.09 | 1.08 | 1.22 | 1.09 | -         | -         | -         | -         | 1.08  |
|      | SCAD   | 1.05 | 1.08 | 1.04 | 1.04 | -         | -         | -         | -         | 1.04  |
|      | MCP    | 1.06 | 1.08 | 1.04 | 1.04 | -         | -         | -         | -         | 1.04  |
| 16a  | LASSO  | -    | 9762 | -    | 9762 | -         | -         | -         | -         | 9762  |
|      | SCAD   | -    | 1557 | -    | 1557 | -         | -         | -         | -         | 10511 |
|      | MCP    | -    | 636  | -    | 636  | -         | -         | -         | -         | 3473  |
| 16b  | LASSO  | 1.13 | 1.13 | 1.22 | 1.13 | -         | -         | -         | -         | 1.13  |
|      | SCAD   | 1.04 | 1.04 | 1.04 | 1.04 | -         | -         | -         | -         | 1.04  |
|      | MCP    | 1.05 | 1.05 | 1.04 | 1.04 | -         | -         | -         | -         | 1.14  |
| 17a  | LASSO  | 1.06 | 1.08 | 1.06 | 1.07 | -         | -         | -         | -         | 1.07  |
|      | SCAD   | 1.08 | 1.10 | 1.07 | 1.08 | -         | -         | -         | -         | 1.08  |
|      | MCP    | 1.09 | 1.10 | 1.07 | 1.08 | -         | -         | -         | -         | 1.08  |
| 17b  | LASSO  | 1.01 | 1.01 | 1.01 | 1.01 | -         | -         | -         | -         | 1.01  |
|      | SCAD   | 1.01 | 1.01 | 1.01 | 1.01 | -         | -         | -         | -         | 1.01  |
|      | MCP    | 1.01 | 1.01 | 1.01 | 1.01 | -         | -         | -         | -         | 1.01  |
| 18a  | LASSO  | 1.13 | 1.11 | 1.18 | 1.11 | -         | -         | -         | -         | 1.11  |
|      | SCAD   | 1.09 | 1.10 | 1.08 | 1.08 | -         | -         | -         | -         | 1.08  |
|      | MCP    | 1.09 | 1.10 | 1.08 | 1.09 | -         | -         | -         | -         | 1.08  |
| 18b  | LASSO  | 1.01 | 1.01 | 1.02 | 1.01 | -         | -         | -         | -         | 1.01  |
|      | SCAD   | 1.01 | 1.01 | 1.01 | 1.01 | -         | -         | -         | -         | 1.01  |
|      | MCP    | 1.01 | 1.01 | 1.01 | 1.01 | -         | -         | -         | -         | 1.01  |
| 19a  | LASSO  | 1.13 | 1.10 | 1.18 | 1.11 | -         | -         | -         | -         | 1.11  |
|      | SCAD   | 1.09 | 1.10 | 1.08 | 1.08 | -         | -         | -         | -         | 1.08  |
|      | MCP    | 1.09 | 1.10 | 1.08 | 1.09 | -         | -         | -         | -         | 1.08  |
| 19b  | LASSO  | 1.01 | 1.01 | 1.02 | 1.01 | -         | -         | -         | -         | 1.01  |
|      | SCAD   | 1.01 | 1.01 | 1.01 | 1.01 | -         | -         | -         | -         | 1.01  |
|      | MCP    | 1.01 | 1.01 | 1.01 | 1.01 | -         | -         | -         | -         | 1.01  |

| Case | Method | AIC1 | AIC2  | BIC1 | BIC2  | $L_q$ -A1 | $L_q$ -A2 | $L_q$ -B1 | $L_q$ -B2 | CV     |
|------|--------|------|-------|------|-------|-----------|-----------|-----------|-----------|--------|
| 20a  | LASSO  | 1.18 | 1.17  | 1.21 | 1.18  | -         | -         | -         | -         | 1.17   |
|      | SCAD   | 1.08 | 1.08  | 1.08 | 1.07  | -         | -         | -         | -         | 1.07   |
|      | MCP    | 1.08 | 1.08  | 1.08 | 1.08  | -         | -         | -         | -         | 1.08   |
| 20b  | LASSO  | 1.01 | 1.01  | 1.02 | 1.01  | -         | -         | -         | -         | 1.01   |
|      | SCAD   | 1.01 | 1.01  | 1.01 | 1.01  | -         | -         | -         | -         | 1.01   |
|      | MCP    | 1.01 | 1.01  | 1.01 | 1.01  | -         | -         | -         | -         | 1.01   |
| 21a  | LASSO  | -    | 1.52  | -    | 1.40  | -         | -         | -         | -         | 1.46   |
|      | SCAD   | -    | 1.83  | -    | 1.67  | -         | -         | -         | -         | 1.49   |
|      | MCP    | -    | 1.81  | -    | 1.65  | -         | -         | -         | -         | 1.53   |
| 21b  | LASSO  | 1.05 | 1.07  | 1.05 | 1.06  | -         | -         | -         | -         | 1.05   |
|      | SCAD   | 1.06 | 1.09  | 1.05 | 1.06  | -         | -         | -         | -         | 1.06   |
|      | MCP    | 1.07 | 1.09  | 1.06 | 1.06  | -         | -         | -         | -         | 1.06   |
| 22a  | LASSO  | -    | 3.78  | -    | 3.78  | -         | -         | -         | -         | 3.97   |
|      | SCAD   | -    | 3.05  | -    | 3.06  | -         | -         | -         | -         | 19.9   |
|      | MCP    | -    | 2.68  | -    | 2.68  | -         | -         | -         | -         | 19.2   |
| 22b  | LASSO  | 1.13 | 1.10  | 1.38 | 1.10  | -         | -         | -         | -         | 1.09   |
|      | SCAD   | 1.07 | 1.09  | 1.06 | 1.06  | -         | -         | -         | -         | 1.06   |
|      | MCP    | 1.08 | 1.09  | 1.06 | 1.06  | -         | -         | -         | -         | 1.06   |
| 23a  | LASSO  | -    | 225.5 | -    | 225.5 | -         | -         | -         | -         | 232.6  |
|      | SCAD   | -    | 127.7 | -    | 127.7 | -         | -         | -         | -         | 1633   |
|      | MCP    | -    | 85.16 | -    | 85.16 | -         | -         | -         | -         | 1424   |
| 23b  | LASSO  | 1.12 | 1.10  | 1.40 | 1.10  | -         | -         | -         | -         | 1.09   |
|      | SCAD   | 1.07 | 1.09  | 1.06 | 1.06  | -         | -         | -         | -         | 1.06   |
|      | MCP    | 1.08 | 1.09  | 1.06 | 1.06  | -         | -         | -         | -         | 1.06   |
| 24a  | LASSO  | -    | 22405 | -    | 22405 | -         | -         | -         | -         | 22991  |
|      | SCAD   | -    | 12795 | -    | 12795 | -         | -         | -         | -         | 164365 |
|      | MCP    | -    | 8537  | -    | 8537  | -         | -         | -         | -         | 141781 |
| 24b  | LASSO  | 1.22 | 1.22  | 1.40 | 1.22  | -         | -         | -         | -         | 1.22   |
|      | SCAD   | 1.06 | 1.06  | 1.06 | 1.06  | -         | -         | -         | -         | 1.06   |
|      | MCP    | 1.06 | 1.06  | 1.06 | 1.06  | -         | -         | -         | -         | 1.06   |
| 25a  | LASSO  | 1.07 | 1.09  | 1.07 | 1.08  | -         | -         | -         | -         | 1.08   |
|      | SCAD   | 1.09 | 1.10  | 1.08 | 1.10  | -         | -         | -         | -         | 1.09   |
|      | MCP    | 1.10 | 1.10  | 1.09 | 1.09  | -         | -         | -         | -         | 1.10   |
| 25b  | LASSO  | 1.01 | 1.01  | 1.01 | 1.01  | -         | -         | -         | -         | 1.01   |
|      | SCAD   | 1.01 | 1.01  | 1.01 | 1.01  | -         | -         | -         | -         | 1.01   |
|      | MCP    | 1.01 | 1.01  | 1.01 | 1.01  | -         | -         | -         | -         | 1.01   |
| 26a  | LASSO  | 1.14 | 1.11  | 1.20 | 1.11  | -         | -         | -         | -         | 1.11   |
|      | SCAD   | 1.10 | 1.10  | 1.10 | 1.10  | -         | -         | -         | -         | 1.10   |
|      | MCP    | 1.10 | 1.11  | 1.10 | 1.10  | -         | -         | -         | -         | 1.10   |
| 26b  | LASSO  | 1.01 | 1.01  | 1.02 | 1.01  | -         | -         | -         | -         | 1.01   |
|      | SCAD   | 1.01 | 1.01  | 1.01 | 1.01  | -         | -         | -         | -         | 1.01   |
|      | MCP    | 1.01 | 1.01  | 1.01 | 1.01  | -         | -         | -         | -         | 1.01   |
| 27a  | LASSO  | 1.32 | 1.11  | 1.48 | 1.11  | -         | -         | -         | -         | 1.11   |
|      | SCAD   | 1.10 | 1.10  | 1.10 | 1.10  | -         | -         | -         | -         | 1.10   |
|      | MCP    | 1.10 | 1.11  | 1.10 | 1.10  | -         | -         | -         | -         | 1.10   |
| 27b  | LASSO  | 1.01 | 1.01  | 1.02 | 1.01  | -         | -         | -         | -         | 1.01   |
|      | SCAD   | 1.01 | 1.01  | 1.01 | 1.01  | -         | -         | -         | -         | 1.01   |
|      | MCP    | 1.01 | 1.01  | 1.01 | 1.01  | -         | -         | -         | -         | 1.01   |
| 28a  | LASSO  | 1.43 | 1.23  | 1.56 | 1.24  | -         | -         | -         | -         | 1.24   |
|      | SCAD   | 1.09 | 1.09  | 1.09 | 1.09  | -         | -         | -         | -         | 1.09   |
|      | MCP    | 1.09 | 1.09  | 1.09 | 1.09  | -         | -         | -         | -         | 1.09   |
| 28b  | LASSO  | 1.02 | 1.02  | 1.02 | 1.02  | -         | -         | -         | -         | 1.02   |
|      | SCAD   | 1.01 | 1.01  | 1.01 | 1.01  | -         | -         | -         | -         | 1.01   |
|      | MCP    | 1.01 | 1.01  | 1.01 | 1.01  | -         | -         | -         | -         | 1.01   |
| 29a  | LASSO  | -    | 1.55  | -    | 1.47  | -         | -         | -         | -         | 1.57   |
|      | SCAD   | -    | 1.84  | -    | 1.72  | -         | -         | -         | -         | 1.64   |
|      | MCP    | -    | 1.83  | -    | 1.71  | -         | -         | -         | -         | 1.70   |
| 29b  | LASSO  | 1.06 | 1.08  | 1.07 | 1.08  | -         | -         | -         | -         | 1.07   |
|      | SCAD   | 1.07 | 1.10  | 1.07 | 1.08  | -         | -         | -         | -         | 1.07   |
|      | MCP    | 1.08 | 1.10  | 1.07 | 1.08  | -         | -         | -         | -         | 1.08   |

| Case | Method | AIC1  | AIC2  | BIC1 | BIC2  | $L_q$ -A1 | $L_q$ -A2 | $L_q$ -B1 | $L_q$ -B2 | CV     |
|------|--------|-------|-------|------|-------|-----------|-----------|-----------|-----------|--------|
| 30a  | LASSO  | -     | 4.76  | -    | 4.76  | -         | -         | -         | -         | 5.63   |
|      | SCAD   | -     | 3.54  | -    | 3.55  | -         | -         | -         | -         | 32.16  |
|      | MCP    | -     | 3.02  | -    | 3.02  | -         | -         | -         | -         | 34.25  |
| 30b  | LASSO  | 1.17  | 1.10  | 1.51 | 1.10  | -         | -         | -         | -         | 1.10   |
|      | SCAD   | 1.09  | 1.09  | 1.08 | 1.08  | -         | -         | -         | -         | 1.08   |
|      | MCP    | 1.09  | 1.09  | 1.08 | 1.08  | -         | -         | -         | -         | 1.08   |
| 31a  | LASSO  | -     | 321.6 | -    | 321.6 | -         | -         | -         | -         | 394.4  |
|      | SCAD   | -     | 174.2 | -    | 174.2 | -         | -         | -         | -         | 2940   |
|      | MCP    | -     | 119.1 | -    | 119.1 | -         | -         | -         | -         | 2833   |
| 31b  | LASSO  | 1.16  | 1.10  | 1.72 | 1.10  | -         | -         | -         | -         | 1.10   |
|      | SCAD   | 1.09  | 1.09  | 1.08 | 1.08  | -         | -         | -         | -         | 1.08   |
|      | MCP    | 1.09  | 1.09  | 1.08 | 1.08  | -         | -         | -         | -         | 1.08   |
| 32a  | LASSO  | -     | 32013 | -    | 32013 | -         | -         | -         | -         | 38963  |
|      | SCAD   | -     | 17287 | -    | 17287 | -         | -         | -         | -         | 295232 |
|      | MCP    | -     | 11803 | -    | 11803 | -         | -         | -         | -         | 283219 |
| 32b  | LASSO  | 1.36  | 1.33  | 2.12 | 1.33  | -         | -         | -         | -         | 1.33   |
|      | SCAD   | 19.38 | 1.08  | 1.08 | 1.08  | -         | -         | -         | -         | 1.08   |
|      | MCP    | 1.08  | 1.08  | 1.08 | 1.08  | -         | -         | -         | -         | 1.08   |

Table S32: The results on generalization for  $q = 13/11$  (the  $t$ -error with  $\nu = 10$ ).

| Case | Method | AIC1 | AIC2  | BIC1 | BIC2  | $L_q$ -A1 | $L_q$ -A2 | $L_q$ -B1 | $L_q$ -B2 | CV    |
|------|--------|------|-------|------|-------|-----------|-----------|-----------|-----------|-------|
| 1a   | LASSO  | 1.28 | 1.29  | 1.27 | 1.27  | 1.27      | 1.27      | 1.27      | 1.27      | 1.29  |
|      | SCAD   | 1.28 | 1.30  | 1.27 | 1.28  | 1.27      | 1.27      | 1.27      | 1.27      | 1.29  |
|      | MCP    | 1.30 | 1.31  | 1.28 | 1.28  | 1.27      | 1.27      | 1.27      | 1.27      | 1.29  |
| 1b   | LASSO  | 1.25 | 1.26  | 1.25 | 1.25  | 1.25      | 1.25      | 1.25      | 1.25      | 1.25  |
|      | SCAD   | 1.25 | 1.26  | 1.25 | 1.25  | 1.25      | 1.25      | 1.25      | 1.25      | 1.25  |
|      | MCP    | 1.26 | 1.26  | 1.25 | 1.25  | 1.25      | 1.25      | 1.25      | 1.25      | 1.26  |
| 2a   | LASSO  | 1.33 | 1.33  | 1.36 | 1.34  | 3.24      | 3.24      | 3.24      | 3.24      | 1.33  |
|      | SCAD   | 1.30 | 1.31  | 1.29 | 1.29  | 3.24      | 3.24      | 3.24      | 3.24      | 1.29  |
|      | MCP    | 1.31 | 1.31  | 1.29 | 1.29  | 3.24      | 3.24      | 3.24      | 3.24      | 1.30  |
| 2b   | LASSO  | 1.26 | 1.26  | 1.26 | 1.26  | 1.45      | 1.45      | 1.45      | 1.45      | 1.26  |
|      | SCAD   | 1.26 | 1.26  | 1.25 | 1.25  | 1.45      | 1.45      | 1.45      | 1.45      | 1.26  |
|      | MCP    | 1.26 | 1.26  | 1.25 | 1.25  | 1.45      | 1.45      | 1.45      | 1.45      | 1.26  |
| 3a   | LASSO  | 1.33 | 1.33  | 1.36 | 1.34  | 199.82    | 199.82    | 199.82    | 199.82    | 1.33  |
|      | SCAD   | 1.30 | 1.31  | 1.28 | 1.28  | 199.82    | 199.82    | 199.82    | 199.82    | 1.29  |
|      | MCP    | 1.31 | 1.31  | 1.29 | 1.29  | 199.82    | 199.82    | 199.82    | 199.82    | 1.29  |
| 3b   | LASSO  | 1.26 | 1.26  | 1.26 | 1.26  | 21.27     | 21.27     | 21.27     | 21.27     | 1.26  |
|      | SCAD   | 1.26 | 1.26  | 1.25 | 1.25  | 21.27     | 21.27     | 21.27     | 21.27     | 1.26  |
|      | MCP    | 1.26 | 1.26  | 1.25 | 1.25  | 21.27     | 21.27     | 21.27     | 21.27     | 1.26  |
| 4a   | LASSO  | 1.33 | 1.32  | 1.36 | 1.33  | 19861.33  | 19861.33  | 19861.33  | 19861.33  | 1.32  |
|      | SCAD   | 1.29 | 1.29  | 1.28 | 1.28  | 19861.33  | 19861.33  | 19861.33  | 19861.33  | 1.29  |
|      | MCP    | 1.30 | 1.31  | 1.29 | 1.29  | 19861.33  | 19861.33  | 19861.33  | 19861.33  | 1.29  |
| 4b   | LASSO  | 1.26 | 1.26  | 1.26 | 1.26  | 2002.16   | 2002.16   | 2002.16   | 2002.16   | 1.26  |
|      | SCAD   | 1.26 | 1.26  | 1.25 | 1.25  | 2002.16   | 2002.16   | 2002.16   | 2002.16   | 1.25  |
|      | MCP    | 1.26 | 1.26  | 1.25 | 1.25  | 2002.16   | 2002.16   | 2002.16   | 2002.16   | 1.26  |
| 5a   | LASSO  | -    | 1.49  | -    | 1.46  | -         | 1.47      | -         | 1.47      | 1.48  |
|      | SCAD   | -    | 2.03  | -    | 1.47  | -         | 1.47      | -         | 1.47      | 1.47  |
|      | MCP    | -    | 2.03  | -    | 1.49  | -         | 1.47      | -         | 1.47      | 1.48  |
| 5b   | LASSO  | 1.27 | 1.27  | 1.27 | 1.27  | 1.27      | 1.27      | 1.27      | 1.27      | 1.27  |
|      | SCAD   | 1.27 | 1.28  | 1.27 | 1.27  | 1.27      | 1.27      | 1.27      | 1.27      | 1.27  |
|      | MCP    | 1.28 | 1.29  | 1.27 | 1.27  | 1.27      | 1.27      | 1.27      | 1.27      | 1.27  |
| 6a   | LASSO  | -    | 1.94  | -    | 2.04  | -         | 21.35     | -         | 21.35     | 1.93  |
|      | SCAD   | -    | 1.70  | -    | 1.57  | -         | 21.35     | -         | 21.35     | 1.55  |
|      | MCP    | -    | 1.92  | -    | 1.57  | -         | 21.35     | -         | 21.35     | 1.55  |
| 6b   | LASSO  | 1.34 | 1.32  | 1.46 | 1.35  | 3.26      | 3.26      | 3.26      | 3.26      | 1.32  |
|      | SCAD   | 1.28 | 1.28  | 1.30 | 1.29  | 3.26      | 3.26      | 3.26      | 3.26      | 1.28  |
|      | MCP    | 1.29 | 1.29  | 1.28 | 1.28  | 3.26      | 3.26      | 3.26      | 3.26      | 1.28  |
| 7a   | LASSO  | -    | 21.20 | -    | 21.20 | -         | 2009.84   | -         | 2009.84   | 21.20 |
|      | SCAD   | -    | 1.52  | -    | 1.52  | -         | 2009.84   | -         | 2009.84   | 1.52  |
|      | MCP    | -    | 1.52  | -    | 1.52  | -         | 2009.84   | -         | 2009.84   | 1.52  |
| 7b   | LASSO  | 1.34 | 1.32  | 1.46 | 1.35  | 201.58    | 201.58    | 201.58    | 201.58    | 1.32  |
|      | SCAD   | 1.28 | 1.28  | 1.28 | 1.28  | 201.58    | 201.58    | 201.58    | 201.58    | 1.28  |
|      | MCP    | 1.29 | 1.29  | 1.28 | 1.28  | 201.58    | 201.58    | 201.58    | 201.58    | 1.28  |
| 8a   | LASSO  | -    | 1965  | -    | 1965  | -         | 200862    | -         | 200862    | 1965  |
|      | SCAD   | -    | 1.52  | -    | 1.52  | -         | 200862    | -         | 200862    | 1.52  |
|      | MCP    | -    | 1.52  | -    | 1.52  | -         | 200862    | -         | 200862    | 1.52  |
| 8b   | LASSO  | 1.34 | 1.32  | 1.46 | 1.35  | 20032     | 20032     | 20032     | 20032     | 1.32  |
|      | SCAD   | 1.28 | 1.28  | 1.28 | 1.28  | 20032     | 20032     | 20032     | 20032     | 1.28  |
|      | MCP    | 1.29 | 1.29  | 1.28 | 1.28  | 20032     | 20032     | 20032     | 20032     | 1.28  |
| 9a   | LASSO  | 1.29 | 1.31  | 1.29 | 1.29  | 1.29      | 1.29      | 1.29      | 1.29      | 1.30  |
|      | SCAD   | 1.30 | 1.32  | 1.29 | 1.30  | 1.29      | 1.29      | 1.29      | 1.29      | 1.31  |
|      | MCP    | 1.31 | 1.33  | 1.30 | 1.30  | 1.29      | 1.29      | 1.29      | 1.29      | 1.31  |
| 9b   | LASSO  | 1.26 | 1.26  | 1.26 | 1.26  | 1.26      | 1.26      | 1.26      | 1.26      | 1.26  |
|      | SCAD   | 1.26 | 1.26  | 1.26 | 1.26  | 1.26      | 1.26      | 1.26      | 1.26      | 1.26  |
|      | MCP    | 1.26 | 1.26  | 1.26 | 1.26  | 1.26      | 1.26      | 1.26      | 1.26      | 1.26  |

| Case | Method | AIC1 | AIC2   | BIC1 | BIC2   | $L_q$ -A1 | $L_q$ -A2 | $L_q$ -B1 | $L_q$ -B2 | CV     |
|------|--------|------|--------|------|--------|-----------|-----------|-----------|-----------|--------|
| 10a  | LASSO  | 1.39 | 1.36   | 1.45 | 1.37   | 5.25      | 5.25      | 5.25      | 5.25      | 1.36   |
|      | SCAD   | 1.32 | 1.33   | 1.31 | 1.31   | 5.25      | 5.25      | 5.25      | 5.25      | 1.32   |
|      | MCP    | 1.33 | 1.34   | 1.31 | 1.31   | 5.25      | 5.25      | 5.25      | 5.25      | 1.32   |
| 10b  | LASSO  | 1.26 | 1.26   | 1.27 | 1.27   | 1.65      | 1.65      | 1.65      | 1.65      | 1.26   |
|      | SCAD   | 1.26 | 1.26   | 1.26 | 1.26   | 1.65      | 1.65      | 1.65      | 1.65      | 1.26   |
|      | MCP    | 1.26 | 1.26   | 1.26 | 1.26   | 1.65      | 1.65      | 1.65      | 1.65      | 1.26   |
| 11a  | LASSO  | 1.40 | 1.36   | 1.45 | 1.37   | 402.11    | 402.11    | 402.11    | 402.11    | 1.36   |
|      | SCAD   | 1.32 | 1.33   | 1.31 | 1.31   | 402.11    | 402.11    | 402.11    | 402.11    | 1.32   |
|      | MCP    | 1.33 | 1.33   | 1.31 | 1.31   | 402.11    | 402.11    | 402.11    | 402.11    | 1.32   |
| 11b  | LASSO  | 1.26 | 1.26   | 1.27 | 1.26   | 41.30     | 41.30     | 41.30     | 41.30     | 1.26   |
|      | SCAD   | 1.26 | 1.26   | 1.26 | 1.26   | 41.30     | 41.30     | 41.30     | 41.30     | 1.26   |
|      | MCP    | 1.26 | 1.26   | 1.26 | 1.26   | 41.30     | 41.30     | 41.30     | 41.30     | 1.26   |
| 12a  | LASSO  | 1.40 | 1.37   | 1.45 | 1.38   | 40100     | 40100     | 40100     | 40100     | 1.37   |
|      | SCAD   | 1.31 | 1.31   | 1.31 | 1.31   | 40100     | 40100     | 40100     | 40100     | 1.31   |
|      | MCP    | 1.32 | 1.32   | 1.31 | 1.31   | 40100     | 40100     | 40100     | 40100     | 1.31   |
| 12b  | LASSO  | 1.26 | 1.26   | 1.27 | 1.27   | 4006      | 4006      | 4006      | 4006      | 1.26   |
|      | SCAD   | 1.26 | 1.26   | 1.26 | 1.26   | 4006      | 4006      | 4006      | 4006      | 1.26   |
|      | MCP    | 1.26 | 1.26   | 1.26 | 1.26   | 4006      | 4006      | 4006      | 4006      | 1.26   |
| 13a  | LASSO  | -    | 1.63   | -    | 1.65   | -         | 1.66      | -         | 1.66      | 1.63   |
|      | SCAD   | -    | 2.12   | -    | 1.65   | -         | 1.66      | -         | 1.66      | 1.63   |
|      | MCP    | -    | 2.09   | -    | 1.68   | -         | 1.66      | -         | 1.66      | 1.65   |
| 13b  | LASSO  | 1.29 | 1.29   | 1.29 | 1.29   | 1.29      | 1.29      | 1.29      | 1.29      | 1.29   |
|      | SCAD   | 1.29 | 1.30   | 1.29 | 1.29   | 1.29      | 1.29      | 1.29      | 1.29      | 1.29   |
|      | MCP    | 1.30 | 1.31   | 1.29 | 1.29   | 1.29      | 1.29      | 1.29      | 1.29      | 1.29   |
| 14a  | LASSO  | -    | 2.95   | -    | 2.97   | -         | 41.18     | -         | 41.18     | 2.96   |
|      | SCAD   | -    | 2.39   | -    | 2.41   | -         | 41.18     | -         | 41.18     | 6.03   |
|      | MCP    | -    | 2.56   | -    | 2.24   | -         | 41.18     | -         | 41.18     | 4.84   |
| 14b  | LASSO  | 1.42 | 1.35   | 1.75 | 1.39   | 5.25      | 5.25      | 5.25      | 5.25      | 1.35   |
|      | SCAD   | 1.31 | 1.31   | 1.37 | 1.32   | 5.25      | 5.25      | 5.25      | 5.25      | 1.30   |
|      | MCP    | 1.31 | 1.31   | 1.31 | 1.31   | 5.25      | 5.25      | 5.25      | 5.25      | 1.30   |
| 15a  | LASSO  | -    | 100.23 | -    | 100.23 | -         | 3992.99   | -         | 3992.99   | 100.23 |
|      | SCAD   | -    | 17.21  | -    | 17.23  | -         | 3992.99   | -         | 3992.99   | 112.86 |
|      | MCP    | -    | 7.86   | -    | 7.87   | -         | 3992.99   | -         | 3992.99   | 45.44  |
| 15b  | LASSO  | 1.42 | 1.35   | 1.77 | 1.39   | 401.25    | 401.25    | 401.25    | 401.25    | 1.35   |
|      | SCAD   | 1.31 | 1.31   | 1.30 | 1.30   | 401.25    | 401.25    | 401.25    | 401.25    | 1.30   |
|      | MCP    | 1.31 | 1.31   | 1.30 | 1.30   | 401.25    | 401.25    | 401.25    | 401.25    | 1.30   |
| 16a  | LASSO  | -    | 9830   | -    | 9830   | -         | 399173    | -         | 399173    | 9830   |
|      | SCAD   | -    | 1540   | -    | 1540   | -         | 399173    | -         | 399173    | 11771  |
|      | MCP    | -    | 728    | -    | 729    | -         | 399173    | -         | 399173    | 3741   |
| 16b  | LASSO  | 1.43 | 1.39   | 1.77 | 1.40   | 4007      | 4007      | 4007      | 4007      | 1.39   |
|      | SCAD   | 1.31 | 1.30   | 1.30 | 1.30   | 4007      | 4007      | 4007      | 4007      | 1.30   |
|      | MCP    | 1.31 | 1.31   | 1.30 | 1.30   | 4007      | 4007      | 4007      | 4007      | 1.30   |
| 17a  | LASSO  | 1.31 | 1.32   | 1.31 | 1.31   | 1.31      | 1.31      | 1.31      | 1.31      | 1.32   |
|      | SCAD   | 1.31 | 1.34   | 1.31 | 1.32   | 1.31      | 1.31      | 1.31      | 1.31      | 1.33   |
|      | MCP    | 1.33 | 1.34   | 1.32 | 1.32   | 1.31      | 1.31      | 1.31      | 1.31      | 1.33   |
| 17b  | LASSO  | 1.26 | 1.26   | 1.26 | 1.26   | 1.26      | 1.26      | 1.26      | 1.26      | 1.26   |
|      | SCAD   | 1.26 | 1.26   | 1.26 | 1.26   | 1.26      | 1.26      | 1.26      | 1.26      | 1.26   |
|      | MCP    | 1.26 | 1.26   | 1.26 | 1.26   | 1.26      | 1.26      | 1.26      | 1.26      | 1.26   |
| 18a  | LASSO  | 1.47 | 1.37   | 1.52 | 1.38   | 7.22      | 7.22      | 7.22      | 7.22      | 1.37   |
|      | SCAD   | 1.34 | 1.35   | 1.34 | 1.34   | 7.22      | 7.22      | 7.22      | 7.22      | 1.35   |
|      | MCP    | 1.35 | 1.35   | 1.34 | 1.34   | 7.22      | 7.22      | 7.22      | 7.22      | 1.35   |
| 18b  | LASSO  | 1.27 | 1.26   | 1.28 | 1.27   | 1.85      | 1.85      | 1.85      | 1.85      | 1.26   |
|      | SCAD   | 1.26 | 1.26   | 1.26 | 1.26   | 1.85      | 1.85      | 1.85      | 1.85      | 1.26   |
|      | MCP    | 1.26 | 1.26   | 1.26 | 1.26   | 1.85      | 1.85      | 1.85      | 1.85      | 1.26   |
| 19a  | LASSO  | 1.45 | 1.37   | 1.53 | 1.38   | 600.25    | 600.25    | 600.25    | 600.25    | 1.37   |
|      | SCAD   | 1.34 | 1.35   | 1.33 | 1.34   | 600.25    | 600.25    | 600.25    | 600.25    | 1.34   |
|      | MCP    | 1.35 | 1.35   | 1.34 | 1.34   | 600.25    | 600.25    | 600.25    | 600.25    | 1.34   |
| 19b  | LASSO  | 1.27 | 1.26   | 1.28 | 1.27   | 61.45     | 61.45     | 61.45     | 61.45     | 1.26   |
|      | SCAD   | 1.26 | 1.26   | 1.26 | 1.26   | 61.45     | 61.45     | 61.45     | 61.45     | 1.26   |
|      | MCP    | 1.26 | 1.26   | 1.26 | 1.26   | 61.45     | 61.45     | 61.45     | 61.45     | 1.26   |

| Case | Method | AIC1 | AIC2   | BIC1 | BIC2   | $L_q$ -A1 | $L_q$ -A2 | $L_q$ -B1 | $L_q$ -B2 | CV      |
|------|--------|------|--------|------|--------|-----------|-----------|-----------|-----------|---------|
| 20a  | LASSO  | 1.47 | 1.43   | 1.54 | 1.44   | 59924     | 59924     | 59924     | 59924     | 1.43    |
|      | SCAD   | 1.33 | 1.33   | 1.33 | 1.33   | 59924     | 59924     | 59924     | 59924     | 1.33    |
|      | MCP    | 1.34 | 1.34   | 1.33 | 1.33   | 59924     | 59924     | 59924     | 59924     | 1.34    |
| 20b  | LASSO  | 1.27 | 1.27   | 1.28 | 1.27   | 6022      | 6022      | 6022      | 6022      | 1.27    |
|      | SCAD   | 1.26 | 1.26   | 1.26 | 1.26   | 6022      | 6022      | 6022      | 6022      | 1.26    |
|      | MCP    | 1.26 | 1.26   | 1.26 | 1.26   | 6022      | 6022      | 6022      | 6022      | 1.26    |
| 21a  | LASSO  | -    | 1.73   | -    | 1.83   | -         | 1.86      | -         | 1.86      | 1.76    |
|      | SCAD   | -    | 2.17   | -    | 1.84   | -         | 1.86      | -         | 1.86      | 1.78    |
|      | MCP    | -    | 2.14   | -    | 1.84   | -         | 1.86      | -         | 1.86      | 1.81    |
| 21b  | LASSO  | 1.30 | 1.31   | 1.31 | 1.31   | 1.31      | 1.31      | 1.31      | 1.31      | 1.31    |
|      | SCAD   | 1.30 | 1.32   | 1.31 | 1.31   | 1.31      | 1.31      | 1.31      | 1.31      | 1.31    |
|      | MCP    | 1.31 | 1.33   | 1.31 | 1.31   | 1.31      | 1.31      | 1.31      | 1.31      | 1.31    |
| 22a  | LASSO  | -    | 4.17   | -    | 4.18   | -         | 61.05     | -         | 61.05     | 4.43    |
|      | SCAD   | -    | 3.51   | -    | 3.56   | -         | 61.05     | -         | 61.05     | 20.07   |
|      | MCP    | -    | 3.12   | -    | 3.16   | -         | 61.05     | -         | 61.05     | 19.42   |
| 22b  | LASSO  | 1.52 | 1.37   | 1.99 | 1.40   | 7.26      | 7.26      | 7.26      | 7.26      | 1.36    |
|      | SCAD   | 1.33 | 1.33   | 1.39 | 1.34   | 7.26      | 7.26      | 7.26      | 7.26      | 1.33    |
|      | MCP    | 1.33 | 1.34   | 1.33 | 1.33   | 7.26      | 7.26      | 7.26      | 7.26      | 1.33    |
| 23a  | LASSO  | -    | 224.32 | -    | 224.32 | -         | 5985      | -         | 5985      | 235.42  |
|      | SCAD   | -    | 127.43 | -    | 127.59 | -         | 5985      | -         | 5985      | 1609.98 |
|      | MCP    | -    | 85.82  | -    | 85.90  | -         | 5985      | -         | 5985      | 1351.60 |
| 23b  | LASSO  | 1.54 | 1.37   | 2.21 | 1.40   | 601.62    | 601.62    | 601.62    | 601.62    | 1.36    |
|      | SCAD   | 1.33 | 1.33   | 1.33 | 1.33   | 601.62    | 601.62    | 601.62    | 601.62    | 1.33    |
|      | MCP    | 1.33 | 1.34   | 1.33 | 1.33   | 601.62    | 601.62    | 601.62    | 601.62    | 1.33    |
| 24a  | LASSO  | -    | 22282  | -    | 22288  | -         | 598401    | -         | 598401    | 23403   |
|      | SCAD   | -    | 12921  | -    | 12974  | -         | 598401    | -         | 598401    | 160901  |
|      | MCP    | -    | 8716   | -    | 8724   | -         | 598401    | -         | 598401    | 140537  |
| 24b  | LASSO  | 1.57 | 1.49   | 2.22 | 1.49   | 60034     | 60034     | 60034     | 60034     | 1.49    |
|      | SCAD   | 1.33 | 1.33   | 1.33 | 1.33   | 60034     | 60034     | 60034     | 60034     | 1.33    |
|      | MCP    | 1.33 | 1.33   | 1.33 | 1.33   | 60034     | 60034     | 60034     | 60034     | 1.33    |
| 25a  | LASSO  | 1.32 | 1.34   | 1.33 | 1.33   | 1.33      | 1.33      | 1.33      | 1.33      | 1.33    |
|      | SCAD   | 1.33 | 1.35   | 1.33 | 1.34   | 1.33      | 1.33      | 1.33      | 1.33      | 1.35    |
|      | MCP    | 1.34 | 1.35   | 1.33 | 1.34   | 1.33      | 1.33      | 1.33      | 1.33      | 1.35    |
| 25b  | LASSO  | 1.26 | 1.26   | 1.26 | 1.26   | 1.26      | 1.26      | 1.26      | 1.26      | 1.26    |
|      | SCAD   | 1.26 | 1.26   | 1.26 | 1.26   | 1.26      | 1.26      | 1.26      | 1.26      | 1.26    |
|      | MCP    | 1.26 | 1.26   | 1.26 | 1.26   | 1.26      | 1.26      | 1.26      | 1.26      | 1.26    |
| 26a  | LASSO  | 1.49 | 1.38   | 1.55 | 1.39   | 9.28      | 9.28      | 9.28      | 9.28      | 1.38    |
|      | SCAD   | 1.36 | 1.37   | 1.36 | 1.36   | 9.28      | 9.28      | 9.28      | 9.28      | 1.37    |
|      | MCP    | 1.37 | 1.37   | 1.36 | 1.36   | 9.28      | 9.28      | 9.28      | 9.28      | 1.37    |
| 26b  | LASSO  | 1.27 | 1.26   | 1.28 | 1.27   | 2.06      | 2.06      | 2.06      | 2.06      | 1.26    |
|      | SCAD   | 1.26 | 1.26   | 1.26 | 1.26   | 2.06      | 2.06      | 2.06      | 2.06      | 1.26    |
|      | MCP    | 1.26 | 1.26   | 1.26 | 1.26   | 2.06      | 2.06      | 2.06      | 2.06      | 1.26    |
| 27a  | LASSO  | 1.49 | 1.38   | 1.55 | 1.38   | 804.48    | 804.48    | 804.48    | 804.48    | 1.38    |
|      | SCAD   | 1.36 | 1.37   | 1.36 | 1.36   | 804.48    | 804.48    | 804.48    | 804.48    | 1.37    |
|      | MCP    | 1.37 | 1.37   | 1.36 | 1.36   | 804.48    | 804.48    | 804.48    | 804.48    | 1.36    |
| 27b  | LASSO  | 1.27 | 1.26   | 1.28 | 1.27   | 81.34     | 81.34     | 81.34     | 81.34     | 1.26    |
|      | SCAD   | 1.26 | 1.26   | 1.26 | 1.26   | 81.34     | 81.34     | 81.34     | 81.34     | 1.26    |
|      | MCP    | 1.26 | 1.26   | 1.26 | 1.26   | 81.34     | 81.34     | 81.34     | 81.34     | 1.26    |
| 28a  | LASSO  | 1.56 | 1.51   | 1.61 | 1.51   | 80327     | 80327     | 80327     | 80327     | 1.51    |
|      | SCAD   | 1.36 | 1.36   | 1.36 | 1.36   | 80327     | 80327     | 80327     | 80327     | 1.36    |
|      | MCP    | 1.36 | 1.36   | 1.36 | 1.36   | 80327     | 80327     | 80327     | 80327     | 1.36    |
| 28b  | LASSO  | 1.27 | 1.27   | 1.28 | 1.27   | 8006      | 8006      | 8006      | 8006      | 1.27    |
|      | SCAD   | 1.26 | 1.26   | 1.26 | 1.26   | 8006      | 8006      | 8006      | 8006      | 1.26    |
|      | MCP    | 1.26 | 1.26   | 1.26 | 1.26   | 8006      | 8006      | 8006      | 8006      | 1.26    |
| 29a  | LASSO  | -    | 1.81   | -    | 2.01   | -         | 2.06      | -         | 2.06      | 1.87    |
|      | SCAD   | -    | 2.20   | -    | 2.02   | -         | 2.06      | -         | 2.06      | 1.92    |
|      | MCP    | -    | 2.18   | -    | 1.97   | -         | 2.06      | -         | 2.06      | 1.97    |
| 29b  | LASSO  | 1.32 | 1.32   | 1.33 | 1.33   | 1.33      | 1.33      | 1.33      | 1.33      | 1.32    |
|      | SCAD   | 1.32 | 1.34   | 1.33 | 1.33   | 1.33      | 1.33      | 1.33      | 1.33      | 1.32    |
|      | MCP    | 1.33 | 1.34   | 1.33 | 1.33   | 1.33      | 1.33      | 1.33      | 1.33      | 1.33    |



| Case | Method | AIC1 | AIC2   | BIC1 | BIC2   | $L_q$ -A1 | $L_q$ -A2 | $L_q$ -B1 | $L_q$ -B2 | CV      |
|------|--------|------|--------|------|--------|-----------|-----------|-----------|-----------|---------|
| 30a  | LASSO  | -    | 5.19   | -    | 5.20   | -         | 81.20     | -         | 81.20     | 5.98    |
|      | SCAD   | -    | 4.03   | -    | 4.08   | -         | 81.20     | -         | 81.20     | 32.41   |
|      | MCP    | -    | 3.51   | -    | 3.54   | -         | 81.20     | -         | 81.20     | 33.11   |
| 30b  | LASSO  | 1.63 | 1.37   | 2.09 | 1.39   | 9.26      | 9.26      | 9.26      | 9.26      | 1.37    |
|      | SCAD   | 1.35 | 1.36   | 1.40 | 1.36   | 9.26      | 9.26      | 9.26      | 9.26      | 1.35    |
|      | MCP    | 1.36 | 1.36   | 1.35 | 1.35   | 9.26      | 9.26      | 9.26      | 9.26      | 1.35    |
| 31a  | LASSO  | -    | 325.87 | -    | 325.87 | -         | 8001.53   | -         | 8001.53   | 386.17  |
|      | SCAD   | -    | 177.62 | -    | 178.04 | -         | 8001.53   | -         | 8001.53   | 2957.55 |
|      | MCP    | -    | 122.05 | -    | 122.20 | -         | 8001.53   | -         | 8001.53   | 3004.89 |
| 31b  | LASSO  | 1.70 | 1.37   | 3.07 | 1.39   | 801.68    | 801.68    | 801.68    | 801.68    | 1.37    |
|      | SCAD   | 1.35 | 1.36   | 1.35 | 1.35   | 801.68    | 801.68    | 801.68    | 801.68    | 1.35    |
|      | MCP    | 1.36 | 1.36   | 1.35 | 1.35   | 801.68    | 801.68    | 801.68    | 801.68    | 1.35    |
| 32a  | LASSO  | -    | 32492  | -    | 32497  | -         | 800092    | -         | 800092    | 38123   |
|      | SCAD   | -    | 18310  | -    | 18382  | -         | 800092    | -         | 800092    | 289151  |
|      | MCP    | -    | 12433  | -    | 12456  | -         | 800092    | -         | 800092    | 299076  |
| 32b  | LASSO  | 1.78 | 1.60   | 3.12 | 1.60   | 80040     | 80040     | 80040     | 80040     | 1.60    |
|      | SCAD   | 1.35 | 1.35   | 1.35 | 1.35   | 80040     | 80040     | 80040     | 80040     | 1.35    |
|      | MCP    | 1.35 | 1.35   | 1.35 | 1.35   | 80040     | 80040     | 80040     | 80040     | 1.35    |

Table S33: The results on generalization for  $q = 3/2$  (the  $t$ -error with  $\nu = 3$ ).

| Case | Method | AIC1 | AIC2  | BIC1 | BIC2  | $L_q$ -A1 | $L_q$ -A2 | $L_q$ -B1 | $L_q$ -B2 | CV    |
|------|--------|------|-------|------|-------|-----------|-----------|-----------|-----------|-------|
| 1a   | LASSO  | 2.88 | 2.89  | 2.87 | 2.87  | 2.90      | 2.91      | 2.88      | 2.89      | 2.89  |
|      | SCAD   | 2.89 | 2.90  | 2.87 | 2.87  | 2.91      | 2.93      | 2.88      | 2.90      | 2.89  |
|      | MCP    | 2.90 | 2.90  | 2.88 | 2.88  | 2.93      | 2.94      | 2.89      | 2.90      | 2.90  |
| 1b   | LASSO  | 2.92 | 2.92  | 2.92 | 2.92  | 2.92      | 2.92      | 2.92      | 2.92      | 2.92  |
|      | SCAD   | 2.92 | 2.92  | 2.92 | 2.92  | 2.92      | 2.92      | 2.92      | 2.92      | 2.92  |
|      | MCP    | 2.92 | 2.92  | 2.92 | 2.92  | 2.92      | 2.92      | 2.92      | 2.92      | 2.92  |
| 2a   | LASSO  | 3.08 | 3.00  | 3.11 | 3.02  | 3.07      | 3.05      | 3.12      | 3.09      | 3.02  |
|      | SCAD   | 3.01 | 2.95  | 3.02 | 2.94  | 2.99      | 2.99      | 3.03      | 3.00      | 2.96  |
|      | MCP    | 2.97 | 2.95  | 2.96 | 2.93  | 2.97      | 2.98      | 2.97      | 2.97      | 2.97  |
| 2b   | LASSO  | 2.94 | 2.93  | 2.95 | 2.94  | 2.94      | 2.94      | 2.95      | 2.95      | 2.94  |
|      | SCAD   | 2.94 | 2.93  | 2.94 | 2.93  | 2.93      | 2.93      | 2.94      | 2.94      | 2.93  |
|      | MCP    | 2.93 | 2.93  | 2.93 | 2.93  | 2.93      | 2.93      | 2.93      | 2.93      | 2.93  |
| 3a   | LASSO  | 3.10 | 3.01  | 3.13 | 3.02  | 3.07      | 3.05      | 3.12      | 3.08      | 3.02  |
|      | SCAD   | 2.92 | 2.93  | 2.91 | 2.91  | 2.94      | 2.96      | 2.92      | 2.93      | 2.93  |
|      | MCP    | 2.93 | 2.94  | 2.91 | 2.91  | 2.96      | 2.97      | 2.93      | 2.93      | 2.94  |
| 3b   | LASSO  | 2.94 | 2.93  | 2.95 | 2.94  | 2.94      | 2.94      | 2.95      | 2.94      | 2.94  |
|      | SCAD   | 2.93 | 2.93  | 2.92 | 2.92  | 2.93      | 2.93      | 2.93      | 2.93      | 2.93  |
|      | MCP    | 2.93 | 2.93  | 2.93 | 2.92  | 2.93      | 2.93      | 2.93      | 2.93      | 2.93  |
| 4a   | LASSO  | 3.10 | 3.00  | 3.13 | 3.02  | 3.07      | 3.05      | 3.12      | 3.08      | 3.01  |
|      | SCAD   | 2.92 | 2.93  | 2.91 | 2.91  | 2.94      | 2.96      | 2.92      | 2.93      | 2.92  |
|      | MCP    | 2.93 | 2.94  | 2.91 | 2.91  | 2.96      | 2.97      | 2.93      | 2.93      | 2.93  |
| 4b   | LASSO  | 2.94 | 2.93  | 2.95 | 2.94  | 2.94      | 2.94      | 2.95      | 2.94      | 2.94  |
|      | SCAD   | 2.93 | 2.93  | 2.92 | 2.92  | 2.93      | 2.93      | 2.93      | 2.93      | 2.93  |
|      | MCP    | 2.93 | 2.93  | 2.93 | 2.93  | 2.93      | 2.93      | 2.93      | 2.93      | 2.93  |
| 5a   | LASSO  | -    | 3.49  | -    | 3.29  | -         | 3.55      | -         | 10.56     | 41.90 |
|      | SCAD   | -    | 5.31  | -    | 3.29  | -         | 3.85      | -         | 3.61      | 3.31  |
|      | MCP    | -    | 5.28  | -    | 3.32  | -         | 3.98      | -         | 3.61      | 3.32  |
| 5b   | LASSO  | 2.92 | 2.92  | 2.92 | 2.92  | 2.92      | 2.93      | 2.92      | 2.92      | 2.92  |
|      | SCAD   | 2.92 | 2.92  | 2.92 | 2.92  | 2.93      | 2.93      | 2.92      | 2.92      | 2.92  |
|      | MCP    | 2.92 | 2.93  | 2.92 | 2.92  | 2.93      | 2.93      | 2.92      | 2.92      | 2.92  |
| 6a   | LASSO  | -    | 4.74  | -    | 4.73  | -         | 4.96      | -         | 4.82      | 4.65  |
|      | SCAD   | -    | 5.17  | -    | 4.64  | -         | 4.68      | -         | 4.80      | 4.47  |
|      | MCP    | -    | 5.50  | -    | 4.68  | -         | 4.62      | -         | 4.65      | 4.52  |
| 6b   | LASSO  | 3.31 | 3.05  | 3.42 | 3.10  | 3.21      | 3.09      | 3.48      | 3.20      | 3.05  |
|      | SCAD   | 3.21 | 2.99  | 3.34 | 3.02  | 3.08      | 3.03      | 3.42      | 3.10      | 2.99  |
|      | MCP    | 3.06 | 2.99  | 3.11 | 3.00  | 3.00      | 3.01      | 3.17      | 3.04      | 2.99  |
| 7a   | LASSO  | -    | 23.55 | -    | 23.55 | -         | 23.55     | -         | 23.55     | 23.55 |
|      | SCAD   | -    | 3.73  | -    | 3.72  | -         | 3.75      | -         | 3.75      | 3.73  |
|      | MCP    | -    | 3.74  | -    | 3.73  | -         | 3.77      | -         | 3.77      | 3.72  |
| 7b   | LASSO  | 3.37 | 3.05  | 3.50 | 3.10  | 3.21      | 3.09      | 3.49      | 3.21      | 3.05  |
|      | SCAD   | 2.96 | 2.96  | 2.96 | 2.96  | 2.97      | 2.97      | 2.96      | 2.96      | 2.96  |
|      | MCP    | 2.96 | 2.96  | 2.96 | 2.96  | 2.97      | 2.97      | 2.96      | 2.96      | 2.96  |
| 8a   | LASSO  | -    | 1973  | -    | 1973  | -         | 1973      | -         | 1973      | 1973  |
|      | SCAD   | -    | 3.72  | -    | 3.72  | -         | 3.72      | -         | 3.72      | 3.72  |
|      | MCP    | -    | 3.72  | -    | 3.72  | -         | 3.72      | -         | 3.72      | 3.72  |
| 8b   | LASSO  | 3.37 | 3.05  | 3.50 | 3.10  | 3.21      | 3.09      | 3.49      | 3.21      | 3.05  |
|      | SCAD   | 2.96 | 2.96  | 2.96 | 2.96  | 2.97      | 2.97      | 2.96      | 2.96      | 2.96  |
|      | MCP    | 2.96 | 2.96  | 2.96 | 2.96  | 2.97      | 2.97      | 2.96      | 2.96      | 2.96  |
| 9a   | LASSO  | 2.90 | 2.91  | 2.89 | 2.89  | 2.92      | 2.93      | 2.90      | 2.91      | 2.91  |
|      | SCAD   | 2.90 | 2.91  | 2.89 | 2.89  | 2.93      | 2.95      | 2.90      | 2.92      | 2.91  |
|      | MCP    | 2.92 | 2.93  | 2.89 | 2.90  | 2.95      | 2.96      | 2.91      | 2.92      | 2.92  |
| 9b   | LASSO  | 2.92 | 2.92  | 2.92 | 2.92  | 2.92      | 2.92      | 2.92      | 2.92      | 2.93  |
|      | SCAD   | 2.92 | 2.92  | 2.92 | 2.92  | 2.92      | 2.92      | 2.92      | 2.92      | 2.93  |
|      | MCP    | 2.92 | 2.93  | 2.92 | 2.92  | 2.93      | 2.93      | 2.92      | 2.92      | 2.93  |

| Case | Method | AIC1 | AIC2   | BIC1 | BIC2   | $L_q$ -A1 | $L_q$ -A2 | $L_q$ -B1 | $L_q$ -B2 | CV     |
|------|--------|------|--------|------|--------|-----------|-----------|-----------|-----------|--------|
| 10a  | LASSO  | 3.26 | 3.07   | 3.34 | 3.09   | 3.26      | 3.12      | 3.36      | 3.20      | 3.09   |
|      | SCAD   | 3.12 | 3.02   | 3.16 | 3.01   | 3.08      | 3.05      | 3.18      | 3.06      | 3.04   |
|      | MCP    | 3.05 | 3.02   | 3.04 | 3.01   | 3.03      | 3.03      | 3.05      | 3.03      | 3.04   |
| 10b  | LASSO  | 2.96 | 2.94   | 2.97 | 2.95   | 2.96      | 2.95      | 2.97      | 2.96      | 2.94   |
|      | SCAD   | 2.95 | 2.93   | 2.95 | 2.94   | 2.94      | 2.94      | 2.96      | 2.94      | 2.94   |
|      | MCP    | 2.94 | 2.93   | 2.94 | 2.93   | 2.94      | 2.94      | 2.94      | 2.94      | 2.94   |
| 11a  | LASSO  | 3.33 | 3.08   | 3.41 | 3.10   | 3.27      | 3.13      | 3.38      | 3.20      | 3.09   |
|      | SCAD   | 2.98 | 2.99   | 2.96 | 2.96   | 3.00      | 3.01      | 2.97      | 2.98      | 2.99   |
|      | MCP    | 2.99 | 2.99   | 2.97 | 2.97   | 3.01      | 3.02      | 2.98      | 2.98      | 2.99   |
| 11b  | LASSO  | 2.96 | 2.94   | 2.97 | 2.95   | 2.96      | 2.95      | 2.97      | 2.96      | 2.94   |
|      | SCAD   | 2.93 | 2.93   | 2.93 | 2.93   | 2.93      | 2.93      | 2.93      | 2.93      | 2.93   |
|      | MCP    | 2.93 | 2.93   | 2.93 | 2.93   | 2.93      | 2.93      | 2.93      | 2.93      | 2.93   |
| 12a  | LASSO  | 3.33 | 3.08   | 3.41 | 3.11   | 3.27      | 3.12      | 3.38      | 3.20      | 3.08   |
|      | SCAD   | 2.98 | 2.98   | 2.96 | 2.96   | 3.00      | 3.01      | 2.97      | 2.98      | 2.97   |
|      | MCP    | 2.99 | 2.99   | 2.97 | 2.97   | 3.01      | 3.02      | 2.98      | 2.98      | 2.98   |
| 12b  | LASSO  | 2.96 | 2.94   | 2.97 | 2.95   | 2.96      | 2.94      | 2.97      | 2.96      | 2.94   |
|      | SCAD   | 2.93 | 2.93   | 2.93 | 2.93   | 2.93      | 2.93      | 2.93      | 2.93      | 2.93   |
|      | MCP    | 2.93 | 2.93   | 2.93 | 2.93   | 2.93      | 2.93      | 2.93      | 2.93      | 2.93   |
| 13a  | LASSO  | -    | 3.80   | -    | 3.50   | -         | 3.75      | -         | 3.65      | 3.53   |
|      | SCAD   | -    | 5.46   | -    | 3.50   | -         | 4.08      | -         | 3.82      | 3.50   |
|      | MCP    | -    | 5.40   | -    | 3.56   | -         | 4.18      | -         | 3.84      | 3.51   |
| 13b  | LASSO  | 2.94 | 2.94   | 2.94 | 2.94   | 2.94      | 2.95      | 2.94      | 2.94      | 2.94   |
|      | SCAD   | 2.94 | 2.94   | 2.94 | 2.94   | 2.94      | 2.95      | 2.94      | 2.94      | 2.94   |
|      | MCP    | 2.94 | 2.95   | 2.94 | 2.94   | 2.95      | 2.95      | 2.94      | 2.94      | 2.94   |
| 14a  | LASSO  | -    | 5.82   | -    | 5.83   | -         | 5.93      | -         | 6.97      | 5.87   |
|      | SCAD   | -    | 6.04   | -    | 6.08   | -         | 6.20      | -         | 6.99      | 11.92  |
|      | MCP    | -    | 5.93   | -    | 5.96   | -         | 6.18      | -         | 7.36      | 11.49  |
| 14b  | LASSO  | 3.63 | 3.12   | 3.83 | 3.17   | 3.56      | 3.16      | 4.04      | 3.33      | 3.12   |
|      | SCAD   | 3.42 | 3.06   | 3.65 | 3.08   | 3.26      | 3.09      | 3.90      | 3.19      | 3.05   |
|      | MCP    | 3.18 | 3.05   | 3.27 | 3.07   | 3.09      | 3.08      | 3.43      | 3.14      | 3.05   |
| 15a  | LASSO  | -    | 103.52 | -    | 103.53 | -         | 103.52    | -         | 103.52    | 103.52 |
|      | SCAD   | -    | 51.08  | -    | 49.24  | -         | 51.56     | -         | 51.55     | 46.11  |
|      | MCP    | -    | 11.28  | -    | 11.32  | -         | 11.23     | -         | 11.23     | 49.64  |
| 15b  | LASSO  | 3.90 | 3.12   | 4.24 | 3.18   | 3.60      | 3.16      | 4.22      | 3.33      | 3.12   |
|      | SCAD   | 3.02 | 3.02   | 3.02 | 3.02   | 3.02      | 3.02      | 3.02      | 3.02      | 3.02   |
|      | MCP    | 3.02 | 3.03   | 3.02 | 3.02   | 3.03      | 3.03      | 3.02      | 3.02      | 3.02   |
| 16a  | LASSO  | -    | 9900   | -    | 9901   | -         | 9900      | -         | 9900      | 9900   |
|      | SCAD   | -    | 1621   | -    | 1637   | -         | 1523      | -         | 1523      | 10216  |
|      | MCP    | -    | 705    | -    | 714    | -         | 677       | -         | 677       | 4249   |
| 16b  | LASSO  | 3.90 | 3.14   | 4.24 | 3.18   | 3.60      | 3.16      | 4.23      | 3.33      | 3.14   |
|      | SCAD   | 3.02 | 3.02   | 3.02 | 3.02   | 3.02      | 3.03      | 3.02      | 3.02      | 3.02   |
|      | MCP    | 3.02 | 3.02   | 3.02 | 3.02   | 3.03      | 3.03      | 3.02      | 3.02      | 3.02   |
| 17a  | LASSO  | 2.91 | 2.92   | 2.91 | 2.91   | 2.93      | 2.59      | 2.92      | 2.93      | 2.92   |
|      | SCAD   | 2.92 | 2.93   | 2.91 | 2.91   | 2.94      | 2.97      | 2.92      | 2.94      | 2.93   |
|      | MCP    | 2.93 | 2.94   | 2.91 | 2.91   | 2.96      | 2.98      | 2.93      | 2.94      | 2.94   |
| 17b  | LASSO  | 2.93 | 2.93   | 2.92 | 2.92   | 2.93      | 2.93      | 2.92      | 2.92      | 2.93   |
|      | SCAD   | 2.93 | 2.93   | 2.92 | 2.92   | 2.93      | 2.93      | 2.93      | 2.93      | 2.93   |
|      | MCP    | 2.93 | 2.93   | 2.92 | 2.92   | 2.93      | 2.93      | 2.93      | 2.93      | 2.93   |
| 18a  | LASSO  | 3.39 | 3.11   | 3.48 | 3.12   | 3.41      | 3.15      | 3.52      | 3.22      | 3.13   |
|      | SCAD   | 3.18 | 3.07   | 3.21 | 3.07   | 3.15      | 3.09      | 3.26      | 3.11      | 3.08   |
|      | MCP    | 3.10 | 3.07   | 3.10 | 3.06   | 3.08      | 3.08      | 3.12      | 3.09      | 3.09   |
| 18b  | LASSO  | 2.97 | 2.95   | 2.98 | 2.95   | 2.97      | 2.95      | 3.00      | 2.96      | 2.95   |
|      | SCAD   | 2.96 | 2.94   | 2.96 | 2.94   | 2.95      | 2.94      | 2.98      | 2.95      | 2.94   |
|      | MCP    | 2.94 | 2.94   | 2.95 | 2.94   | 2.94      | 2.94      | 2.97      | 2.94      | 2.94   |
| 19a  | LASSO  | 3.61 | 3.11   | 3.71 | 3.12   | 3.53      | 3.15      | 3.67      | 3.22      | 3.13   |
|      | SCAD   | 3.03 | 3.04   | 3.02 | 3.02   | 3.05      | 3.05      | 3.03      | 3.04      | 3.04   |
|      | MCP    | 3.04 | 3.04   | 3.02 | 3.02   | 3.06      | 3.06      | 3.03      | 3.04      | 3.04   |
| 19b  | LASSO  | 2.98 | 2.95   | 2.98 | 2.95   | 2.97      | 2.95      | 2.99      | 2.96      | 2.95   |
|      | SCAD   | 2.94 | 2.94   | 2.94 | 2.94   | 2.94      | 2.94      | 2.94      | 2.94      | 2.94   |
|      | MCP    | 2.94 | 2.94   | 2.94 | 2.94   | 2.94      | 2.94      | 2.94      | 2.94      | 2.94   |

| Case | Method | AIC1 | AIC2   | BIC1 | BIC2   | $L_q$ -A1 | $L_q$ -A2 | $L_q$ -B1 | $L_q$ -B2 | CV      |
|------|--------|------|--------|------|--------|-----------|-----------|-----------|-----------|---------|
| 20a  | LASSO  | 3.62 | 3.16   | 3.72 | 3.17   | 3.53      | 3.18      | 3.67      | 3.24      | 3.16    |
|      | SCAD   | 3.02 | 3.03   | 3.02 | 3.02   | 3.05      | 3.05      | 3.03      | 3.04      | 3.03    |
|      | MCP    | 3.03 | 3.04   | 3.02 | 3.02   | 3.06      | 3.06      | 3.03      | 3.04      | 3.03    |
| 20b  | LASSO  | 2.98 | 2.95   | 2.98 | 2.95   | 2.97      | 2.95      | 2.99      | 2.96      | 2.95    |
|      | SCAD   | 2.94 | 2.94   | 2.94 | 2.94   | 2.94      | 2.94      | 2.94      | 2.94      | 2.94    |
|      | MCP    | 2.94 | 2.94   | 2.94 | 2.94   | 2.94      | 2.94      | 2.94      | 2.94      | 2.94    |
| 21a  | LASSO  | -    | 3.99   | -    | 3.68   | -         | 3.94      | -         | 3.84      | 3.69    |
|      | SCAD   | -    | 5.48   | -    | 3.69   | -         | 4.26      | -         | 4.01      | 3.67    |
|      | MCP    | -    | 5.45   | -    | 3.80   | -         | 4.38      | -         | 4.03      | 3.69    |
| 21b  | LASSO  | 2.96 | 2.96   | 2.96 | 2.96   | 2.96      | 2.97      | 2.96      | 2.96      | 2.96    |
|      | SCAD   | 2.96 | 2.96   | 2.96 | 2.96   | 2.96      | 2.97      | 2.96      | 2.96      | 2.96    |
|      | MCP    | 2.96 | 2.97   | 2.96 | 2.96   | 2.97      | 2.98      | 2.96      | 2.96      | 2.96    |
| 22a  | LASSO  | -    | 7.05   | -    | 7.09   | -         | 7.10      | -         | 7.87      | 7.38    |
|      | SCAD   | -    | 6.90   | -    | 6.97   | -         | 7.05      | -         | 7.90      | 24.41   |
|      | MCP    | -    | 6.58   | -    | 6.64   | -         | 6.89      | -         | 8.22      | 25.38   |
| 22b  | LASSO  | 3.86 | 3.17   | 4.10 | 3.20   | 3.89      | 3.19      | 4.46      | 3.36      | 3.17    |
|      | SCAD   | 3.49 | 3.11   | 3.74 | 3.13   | 3.42      | 3.14      | 4.18      | 3.23      | 3.11    |
|      | MCP    | 3.23 | 3.11   | 3.34 | 3.12   | 3.17      | 3.13      | 3.64      | 3.19      | 3.11    |
| 23a  | LASSO  | -    | 229.03 | -    | 229.13 | -         | 229.03    | -         | 229.03    | 238.30  |
|      | SCAD   | -    | 135.98 | -    | 137.91 | -         | 133.22    | -         | 133.22    | 1709.53 |
|      | MCP    | -    | 92.80  | -    | 93.58  | -         | 91.05     | -         | 91.05     | 1525.86 |
| 23b  | LASSO  | 4.63 | 3.17   | 5.57 | 3.20   | 4.18      | 3.19      | 5.56      | 3.36      | 3.17    |
|      | SCAD   | 3.08 | 3.08   | 3.08 | 3.08   | 3.08      | 3.08      | 3.08      | 3.08      | 3.08    |
|      | MCP    | 3.08 | 3.08   | 3.08 | 3.08   | 3.09      | 3.09      | 3.08      | 3.08      | 3.08    |
| 24a  | LASSO  | -    | 22513  | -    | 22568  | -         | 22441     | -         | 22441     | 23547   |
|      | SCAD   | -    | 13357  | -    | 13490  | -         | 12689     | -         | 12689     | 168984  |
|      | MCP    | -    | 8995   | -    | 9052   | -         | 8584      | -         | 8584      | 151715  |
| 24b  | LASSO  | 4.65 | 3.26   | 5.60 | 3.27   | 4.18      | 3.27      | 5.60      | 3.37      | 3.26    |
|      | SCAD   | 3.08 | 3.08   | 3.08 | 3.08   | 3.08      | 3.08      | 3.08      | 3.08      | 3.08    |
|      | MCP    | 3.08 | 3.08   | 3.08 | 3.08   | 3.09      | 3.09      | 3.08      | 3.08      | 3.08    |
| 25a  | LASSO  | 2.93 | 2.94   | 2.93 | 2.93   | 2.95      | 2.97      | 2.94      | 2.95      | 2.94    |
|      | SCAD   | 2.94 | 2.95   | 2.93 | 2.93   | 2.96      | 2.99      | 2.94      | 2.96      | 2.95    |
|      | MCP    | 2.95 | 2.96   | 2.93 | 2.94   | 2.98      | 3.00      | 2.95      | 2.96      | 2.96    |
| 25b  | LASSO  | 2.93 | 2.93   | 2.93 | 2.93   | 2.93      | 2.93      | 2.93      | 2.93      | 2.93    |
|      | SCAD   | 2.93 | 2.93   | 2.93 | 2.93   | 2.93      | 2.93      | 2.93      | 2.93      | 2.93    |
|      | MCP    | 2.93 | 2.93   | 2.93 | 2.93   | 2.93      | 2.93      | 2.93      | 2.93      | 2.93    |
| 26a  | LASSO  | 3.39 | 3.13   | 3.47 | 3.14   | 3.42      | 3.16      | 3.57      | 3.21      | 3.15    |
|      | SCAD   | 3.19 | 3.11   | 3.21 | 3.11   | 3.17      | 3.13      | 3.29      | 3.15      | 3.13    |
|      | MCP    | 3.13 | 3.11   | 3.13 | 3.10   | 3.12      | 3.12      | 3.18      | 3.13      | 3.13    |
| 26b  | LASSO  | 2.98 | 2.95   | 2.98 | 2.95   | 2.97      | 2.95      | 3.01      | 2.96      | 2.95    |
|      | SCAD   | 2.96 | 2.95   | 2.96 | 2.95   | 2.95      | 2.95      | 2.99      | 2.95      | 2.95    |
|      | MCP    | 2.95 | 2.95   | 2.95 | 2.95   | 2.95      | 2.95      | 2.97      | 2.95      | 2.95    |
| 27a  | LASSO  | 3.60 | 3.14   | 3.71 | 3.14   | 3.55      | 3.16      | 3.68      | 3.21      | 3.14    |
|      | SCAD   | 3.09 | 3.09   | 3.08 | 3.09   | 3.10      | 3.10      | 3.09      | 3.09      | 3.10    |
|      | MCP    | 3.09 | 3.09   | 3.08 | 3.09   | 3.11      | 3.11      | 3.09      | 3.09      | 3.10    |
| 27b  | LASSO  | 2.98 | 2.95   | 2.98 | 2.95   | 2.97      | 2.95      | 2.98      | 2.96      | 2.95    |
|      | SCAD   | 2.94 | 2.94   | 2.94 | 2.94   | 2.94      | 2.94      | 2.94      | 2.94      | 2.94    |
|      | MCP    | 2.94 | 2.94   | 2.94 | 2.94   | 2.95      | 2.95      | 2.94      | 2.94      | 2.95    |
| 28a  | LASSO  | 3.65 | 3.26   | 6.15 | 3.26   | 3.57      | 3.27      | 6.11      | 3.29      | 3.26    |
|      | SCAD   | 3.09 | 3.09   | 3.08 | 3.08   | 3.10      | 3.10      | 3.09      | 3.09      | 3.09    |
|      | MCP    | 3.09 | 3.09   | 3.08 | 3.08   | 3.10      | 3.10      | 3.09      | 3.09      | 3.09    |
| 28b  | LASSO  | 2.98 | 2.96   | 2.98 | 2.96   | 2.98      | 2.96      | 2.99      | 2.96      | 2.96    |
|      | SCAD   | 2.94 | 2.94   | 2.94 | 2.94   | 2.94      | 2.94      | 2.94      | 2.94      | 2.94    |
|      | MCP    | 2.94 | 2.94   | 2.94 | 2.94   | 2.95      | 2.95      | 2.94      | 2.94      | 2.95    |
| 29a  | LASSO  | -    | 4.16   | -    | 3.86   | -         | 4.12      | -         | 4.03      | 3.83    |
|      | SCAD   | -    | 5.50   | -    | 3.88   | -         | 4.45      | -         | 4.19      | 3.83    |
|      | MCP    | -    | 5.54   | -    | 3.99   | -         | 4.56      | -         | 4.22      | 3.87    |
| 29b  | LASSO  | 2.98 | 2.98   | 2.98 | 2.98   | 2.98      | 2.99      | 2.98      | 2.98      | 2.98    |
|      | SCAD   | 2.98 | 2.98   | 2.98 | 2.98   | 2.98      | 2.99      | 2.98      | 2.98      | 2.98    |
|      | MCP    | 2.98 | 2.99   | 2.98 | 2.98   | 2.99      | 3.00      | 2.98      | 2.98      | 2.98    |

| Case | Method | AIC1  | AIC2   | BIC1  | BIC2   | $L_q$ -A1 | $L_q$ -A2 | $L_q$ -B1 | $L_q$ -B2 | CV      |
|------|--------|-------|--------|-------|--------|-----------|-----------|-----------|-----------|---------|
| 30a  | LASSO  | -     | 8.09   | -     | 8.12   | -         | 8.12      | -         | 8.58      | 9.06    |
|      | SCAD   | -     | 7.44   | -     | 7.53   | -         | 7.58      | -         | 8.26      | 35.07   |
|      | MCP    | -     | 6.95   | -     | 6.98   | -         | 7.15      | -         | 8.47      | 38.04   |
| 30b  | LASSO  | 3.92  | 3.19   | 4.18  | 3.20   | 4.06      | 3.20      | 4.69      | 3.30      | 3.19    |
|      | SCAD   | 3.46  | 3.16   | 3.67  | 3.17   | 3.48      | 3.18      | 4.24      | 3.25      | 3.16    |
|      | MCP    | 3.26  | 3.16   | 3.35  | 3.16   | 3.23      | 3.17      | 3.79      | 3.23      | 3.16    |
| 31a  | LASSO  | -     | 331.08 | -     | 331.21 | -         | 331.08    | -         | 331.08    | 404.68  |
|      | SCAD   | -     | 185.22 | -     | 187.28 | -         | 180.93    | -         | 180.93    | 2867.77 |
|      | MCP    | -     | 128.18 | -     | 129.15 | -         | 125.76    | -         | 125.76    | 2850.95 |
| 31b  | LASSO  | 5.50  | 3.19   | 6.56  | 3.20   | 5.11      | 3.20      | 6.59      | 3.30      | 3.19    |
|      | SCAD   | 3.49  | 3.14   | 3.14  | 3.14   | 3.14      | 3.14      | 3.14      | 3.14      | 3.14    |
|      | MCP    | 3.14  | 3.14   | 3.14  | 3.14   | 3.14      | 3.14      | 3.14      | 3.14      | 3.14    |
| 32a  | LASSO  | -     | 32875  | -     | 32966  | -         | 32653     | -         | 32653     | 40831   |
|      | SCAD   | -     | 18575  | -     | 18777  | -         | 17583     | -         | 17583     | 281689  |
|      | MCP    | -     | 12711  | -     | 12789  | -         | 12104     | -         | 12104     | 285042  |
| 32b  | LASSO  | 16.32 | 3.40   | 17.37 | 3.40   | 15.92     | 3.40      | 17.40     | 3.42      | 3.40    |
|      | SCAD   | 28.91 | 3.14   | 3.14  | 3.14   | 3.14      | 3.14      | 3.14      | 3.14      | 3.14    |
|      | MCP    | 3.14  | 3.14   | 3.14  | 3.14   | 3.14      | 3.14      | 3.14      | 3.14      | 3.14    |

Table S34: The results on generalization for  $q = 5/3$  (the  $t$ -error with  $\nu = 2$ ).

| Case | Method | AIC1  | AIC2    | BIC1  | BIC2    | $L_q$ -A1 | $L_q$ -A2 | $L_q$ -B1 | $L_q$ -B2 | CV      |
|------|--------|-------|---------|-------|---------|-----------|-----------|-----------|-----------|---------|
| 1a   | LASSO  | 10.68 | 10.70   | 10.68 | 10.69   | 11.56     | 11.76     | 11.44     | 11.64     | 10.72   |
|      | SCAD   | 10.69 | 10.70   | 10.68 | 10.69   | 11.74     | 11.82     | 11.59     | 11.74     | 10.72   |
|      | MCP    | 10.69 | 10.71   | 10.69 | 10.69   | 11.78     | 11.82     | 11.67     | 11.75     | 10.74   |
| 1b   | LASSO  | 25.40 | 25.42   | 25.40 | 25.41   | 25.65     | 25.67     | 25.62     | 25.65     | 25.41   |
|      | SCAD   | 25.40 | 25.42   | 25.40 | 25.41   | 25.67     | 25.68     | 25.64     | 25.67     | 25.41   |
|      | MCP    | 25.40 | 25.41   | 25.40 | 25.41   | 25.68     | 25.68     | 25.65     | 25.67     | 25.41   |
| 2a   | LASSO  | 11.21 | 11.04   | 11.23 | 11.06   | 11.65     | 11.79     | 11.57     | 11.74     | 11.10   |
|      | SCAD   | 11.16 | 10.97   | 11.18 | 10.99   | 11.76     | 11.82     | 11.66     | 11.76     | 11.08   |
|      | MCP    | 11.05 | 10.97   | 11.05 | 10.97   | 11.80     | 11.82     | 11.71     | 11.76     | 11.08   |
| 2b   | LASSO  | 25.47 | 25.45   | 25.47 | 25.46   | 25.66     | 25.68     | 25.64     | 25.66     | 25.46   |
|      | SCAD   | 25.47 | 25.45   | 25.47 | 25.45   | 25.67     | 25.68     | 25.65     | 25.67     | 25.46   |
|      | MCP    | 25.45 | 25.45   | 25.45 | 25.45   | 25.68     | 25.68     | 25.66     | 25.67     | 25.46   |
| 3a   | LASSO  | 11.83 | 11.32   | 11.84 | 11.33   | 11.65     | 11.78     | 11.58     | 11.73     | 11.42   |
|      | SCAD   | 11.11 | 11.02   | 11.10 | 11.00   | 11.76     | 11.82     | 11.65     | 11.75     | 11.11   |
|      | MCP    | 11.05 | 11.02   | 11.04 | 11.00   | 11.80     | 11.82     | 11.71     | 11.76     | 11.09   |
| 3b   | LASSO  | 25.54 | 25.48   | 25.54 | 25.49   | 25.69     | 25.67     | 25.64     | 25.66     | 25.51   |
|      | SCAD   | 25.46 | 25.45   | 25.46 | 25.45   | 25.67     | 25.68     | 25.65     | 25.67     | 25.47   |
|      | MCP    | 25.45 | 25.45   | 25.45 | 25.45   | 25.68     | 25.68     | 25.66     | 25.67     | 25.47   |
| 4a   | LASSO  | 11.97 | 11.31   | 11.99 | 11.33   | 11.58     | 11.59     | 11.55     | 11.59     | 11.39   |
|      | SCAD   | 10.90 | 10.91   | 10.89 | 10.89   | 11.73     | 11.74     | 11.64     | 11.71     | 10.93   |
|      | MCP    | 10.90 | 10.92   | 10.90 | 10.90   | 11.78     | 11.78     | 11.70     | 11.75     | 10.93   |
| 4b   | LASSO  | 25.67 | 25.52   | 25.67 | 25.52   | 25.65     | 25.65     | 25.64     | 25.65     | 25.53   |
|      | SCAD   | 25.44 | 25.44   | 25.44 | 25.44   | 25.67     | 25.67     | 25.65     | 25.66     | 25.44   |
|      | MCP    | 25.44 | 25.44   | 25.43 | 25.44   | 25.68     | 25.68     | 25.66     | 25.67     | 25.44   |
| 5a   | LASSO  | -     | 14.36   | -     | 14.07   | -         | 21.41     | -         | 20.87     | 14.15   |
|      | SCAD   | -     | 20.45   | -     | 14.07   | -         | 25.19     | -         | 24.75     | 14.10   |
|      | MCP    | -     | 20.98   | -     | 14.09   | -         | 25.24     | -         | 24.74     | 14.12   |
| 5b   | LASSO  | 12.63 | 12.63   | 12.63 | 12.63   | 13.42     | 13.79     | 13.17     | 13.53     | 12.63   |
|      | SCAD   | 12.63 | 12.63   | 12.63 | 12.63   | 13.72     | 13.86     | 13.38     | 13.71     | 12.63   |
|      | MCP    | 12.63 | 12.63   | 12.63 | 12.63   | 13.79     | 13.85     | 13.52     | 13.70     | 12.63   |
| 6a   | LASSO  | -     | 18.30   | -     | 17.74   | -         | 20.88     | -         | 20.87     | 17.72   |
|      | SCAD   | -     | 21.72   | -     | 19.80   | -         | 24.49     | -         | 24.43     | 18.85   |
|      | MCP    | -     | 21.99   | -     | 20.04   | -         | 24.80     | -         | 24.72     | 19.12   |
| 6b   | LASSO  | 13.44 | 13.08   | 13.51 | 13.13   | 13.53     | 13.82     | 13.39     | 13.68     | 13.09   |
|      | SCAD   | 13.43 | 13.07   | 13.51 | 13.12   | 13.75     | 13.86     | 13.54     | 13.74     | 13.09   |
|      | MCP    | 13.25 | 13.08   | 13.31 | 13.10   | 13.81     | 13.86     | 13.61     | 13.74     | 13.10   |
| 7a   | LASSO  | -     | 37.57   | -     | 37.57   | -         | 37.88     | -         | 37.88     | 37.51   |
|      | SCAD   | -     | 18.30   | -     | 18.26   | -         | 18.91     | -         | 18.91     | 18.13   |
|      | MCP    | -     | 18.47   | -     | 18.45   | -         | 19.24     | -         | 19.24     | 18.05   |
| 7b   | LASSO  | 15.20 | 13.25   | 15.22 | 13.31   | 13.54     | 13.81     | 13.42     | 13.68     | 13.26   |
|      | SCAD   | 13.20 | 12.90   | 13.20 | 12.90   | 13.75     | 13.86     | 13.58     | 13.73     | 12.91   |
|      | MCP    | 13.02 | 12.90   | 13.02 | 12.90   | 13.80     | 13.86     | 13.59     | 13.73     | 12.91   |
| 8a   | LASSO  | -     | 1978.49 | -     | 1978.49 | -         | 1978.49   | -         | 1978.49   | 1978.49 |
|      | SCAD   | -     | 16.41   | -     | 16.41   | -         | 16.41     | -         | 16.41     | 16.42   |
|      | MCP    | -     | 16.41   | -     | 16.41   | -         | 16.41     | -         | 16.41     | 16.42   |
| 8b   | LASSO  | 15.28 | 13.25   | 15.30 | 13.31   | 13.51     | 13.52     | 13.42     | 13.51     | 13.26   |
|      | SCAD   | 12.85 | 12.86   | 12.85 | 12.85   | 13.72     | 13.72     | 13.48     | 13.68     | 12.86   |
|      | MCP    | 12.85 | 12.86   | 12.85 | 12.85   | 13.79     | 13.79     | 13.58     | 13.72     | 12.86   |
| 9a   | LASSO  | 10.71 | 10.73   | 10.71 | 10.71   | 11.57     | 11.76     | 11.44     | 11.65     | 10.75   |
|      | SCAD   | 10.71 | 10.73   | 10.71 | 10.71   | 11.74     | 11.82     | 11.60     | 11.75     | 10.74   |
|      | MCP    | 10.72 | 10.74   | 10.71 | 10.71   | 11.78     | 11.82     | 11.68     | 11.75     | 10.76   |
| 9b   | LASSO  | 25.41 | 25.42   | 25.41 | 25.42   | 25.65     | 25.67     | 25.62     | 25.65     | 25.41   |
|      | SCAD   | 25.41 | 25.42   | 25.41 | 25.42   | 25.67     | 25.68     | 25.64     | 25.67     | 25.41   |
|      | MCP    | 25.41 | 25.42   | 25.41 | 25.41   | 25.68     | 25.68     | 25.65     | 25.67     | 25.41   |

| Case | Method | AIC1  | AIC2   | BIC1  | BIC2   | $L_q$ -A1 | $L_q$ -A2 | $L_q$ -B1 | $L_q$ -B2 | CV     |
|------|--------|-------|--------|-------|--------|-----------|-----------|-----------|-----------|--------|
| 10a  | LASSO  | 11.62 | 11.23  | 11.67 | 11.25  | 11.73     | 11.82     | 11.72     | 11.79     | 11.30  |
|      | SCAD   | 11.53 | 11.18  | 11.57 | 11.21  | 11.80     | 11.83     | 11.74     | 11.79     | 11.28  |
|      | MCP    | 11.34 | 11.19  | 11.35 | 11.20  | 11.82     | 11.83     | 11.77     | 11.80     | 11.30  |
| 10b  | LASSO  | 25.52 | 25.48  | 25.52 | 25.48  | 25.67     | 25.68     | 25.66     | 25.67     | 25.48  |
|      | SCAD   | 25.51 | 25.48  | 25.52 | 25.48  | 25.68     | 25.68     | 25.67     | 25.68     | 25.49  |
|      | MCP    | 25.49 | 25.47  | 25.49 | 25.48  | 25.68     | 25.68     | 25.67     | 25.67     | 25.49  |
| 11a  | LASSO  | 13.02 | 11.64  | 13.09 | 11.66  | 11.74     | 11.81     | 11.74     | 11.78     | 11.82  |
|      | SCAD   | 11.65 | 11.31  | 11.64 | 11.34  | 11.80     | 11.83     | 11.72     | 11.78     | 11.44  |
|      | MCP    | 11.52 | 11.32  | 11.51 | 11.30  | 11.82     | 11.83     | 11.76     | 11.79     | 11.48  |
| 11b  | LASSO  | 25.66 | 25.53  | 25.66 | 25.54  | 25.67     | 25.68     | 25.66     | 25.67     | 25.54  |
|      | SCAD   | 25.51 | 25.50  | 25.51 | 25.49  | 25.68     | 25.68     | 25.66     | 25.67     | 25.51  |
|      | MCP    | 25.50 | 25.50  | 25.50 | 25.50  | 25.68     | 25.68     | 25.67     | 25.67     | 25.51  |
| 12a  | LASSO  | 13.34 | 11.65  | 13.41 | 11.67  | 11.69     | 11.69     | 11.72     | 11.69     | 11.72  |
|      | SCAD   | 11.18 | 11.20  | 11.18 | 11.18  | 11.75     | 11.75     | 11.70     | 11.74     | 11.20  |
|      | MCP    | 11.19 | 11.21  | 11.18 | 11.18  | 11.79     | 11.79     | 11.75     | 11.77     | 11.23  |
| 12b  | LASSO  | 25.89 | 25.56  | 25.89 | 25.57  | 25.66     | 25.66     | 25.66     | 25.66     | 25.57  |
|      | SCAD   | 25.47 | 25.47  | 25.47 | 25.47  | 25.67     | 25.67     | 25.66     | 25.67     | 25.47  |
|      | MCP    | 25.47 | 25.47  | 25.47 | 25.47  | 25.68     | 25.68     | 25.67     | 25.67     | 25.47  |
| 13a  | LASSO  | -     | 14.71  | -     | 14.26  | -         | 21.40     | -         | 20.94     | 14.33  |
|      | SCAD   | -     | 20.98  | -     | 14.26  | -         | 25.18     | -         | 24.78     | 14.30  |
|      | MCP    | -     | 21.37  | -     | 14.29  | -         | 25.25     | -         | 24.79     | 14.31  |
| 13b  | LASSO  | 12.65 | 12.65  | 12.65 | 12.65  | 13.43     | 13.79     | 13.19     | 13.55     | 12.66  |
|      | SCAD   | 12.65 | 12.65  | 12.65 | 12.65  | 13.73     | 13.86     | 13.40     | 13.72     | 12.66  |
|      | MCP    | 12.65 | 12.65  | 12.65 | 12.65  | 13.79     | 13.86     | 13.53     | 13.71     | 12.66  |
| 14a  | LASSO  | -     | 19.67  | -     | 19.45  | -         | 21.92     | -         | 21.92     | 19.93  |
|      | SCAD   | -     | 25.03  | -     | 21.89  | -         | 25.02     | -         | 25.04     | 27.87  |
|      | MCP    | -     | 25.08  | -     | 22.11  | -         | 25.09     | -         | 25.09     | 28.74  |
| 14b  | LASSO  | 13.89 | 13.32  | 14.06 | 13.37  | 13.65     | 13.85     | 13.63     | 13.77     | 13.33  |
|      | SCAD   | 13.85 | 13.34  | 14.03 | 13.38  | 13.79     | 13.87     | 13.70     | 13.79     | 13.36  |
|      | MCP    | 13.61 | 13.35  | 13.72 | 13.38  | 13.83     | 13.87     | 13.71     | 13.78     | 13.38  |
| 15a  | LASSO  | -     | 120.93 | -     | 120.94 | -         | 120.93    | -         | 120.93    | 120.94 |
|      | SCAD   | -     | 38.92  | -     | 39.45  | -         | 38.66     | -         | 38.66     | 136.14 |
|      | MCP    | -     | 27.59  | -     | 27.69  | -         | 27.55     | -         | 27.55     | 68.83  |
| 15b  | LASSO  | 18.14 | 13.57  | 18.23 | 13.61  | 13.67     | 13.83     | 13.68     | 13.78     | 13.58  |
|      | SCAD   | 13.78 | 13.18  | 13.78 | 13.17  | 13.78     | 13.87     | 13.58     | 13.77     | 13.18  |
|      | MCP    | 13.29 | 13.18  | 13.29 | 13.18  | 13.82     | 13.87     | 13.66     | 13.77     | 13.18  |
| 16a  | LASSO  | -     | 10079  | -     | 10088  | -         | 10079     | -         | 10079     | 10079  |
|      | SCAD   | -     | 1715   | -     | 1751   | -         | 1627      | -         | 1627      | 11198  |
|      | MCP    | -     | 696    | -     | 706    | -         | 664       | -         | 664       | 4802   |
| 16b  | LASSO  | 19.35 | 13.57  | 19.33 | 13.61  | 13.64     | 13.64     | 13.68     | 13.64     | 13.58  |
|      | SCAD   | 13.11 | 13.12  | 13.11 | 13.11  | 13.73     | 13.73     | 13.58     | 13.71     | 13.12  |
|      | MCP    | 13.11 | 13.12  | 13.11 | 13.12  | 13.79     | 13.79     | 13.66     | 13.75     | 13.12  |
| 17a  | LASSO  | 10.72 | 10.73  | 10.72 | 10.72  | 11.57     | 11.76     | 11.45     | 11.65     | 10.76  |
|      | SCAD   | 10.72 | 10.74  | 10.72 | 10.72  | 11.74     | 11.81     | 11.61     | 11.75     | 10.76  |
|      | MCP    | 10.73 | 10.74  | 10.72 | 10.72  | 11.79     | 11.82     | 11.69     | 11.75     | 10.78  |
| 17b  | LASSO  | 25.41 | 25.42  | 25.41 | 25.42  | 25.65     | 25.67     | 25.62     | 25.65     | 25.41  |
|      | SCAD   | 25.41 | 25.42  | 25.41 | 25.42  | 25.67     | 25.68     | 25.64     | 25.67     | 25.41  |
|      | MCP    | 25.41 | 25.42  | 25.41 | 25.42  | 25.68     | 25.68     | 25.66     | 25.67     | 25.42  |
| 18a  | LASSO  | 11.76 | 11.32  | 11.85 | 11.34  | 11.80     | 11.84     | 11.81     | 11.83     | 11.41  |
|      | SCAD   | 11.67 | 11.31  | 11.73 | 11.33  | 11.82     | 11.84     | 11.80     | 11.82     | 11.41  |
|      | MCP    | 11.49 | 11.33  | 11.52 | 11.34  | 11.83     | 11.84     | 11.81     | 11.82     | 11.44  |
| 18b  | LASSO  | 25.55 | 25.49  | 25.56 | 25.50  | 25.68     | 25.68     | 25.67     | 25.68     | 25.50  |
|      | SCAD   | 25.55 | 25.50  | 25.56 | 25.50  | 25.68     | 25.68     | 25.68     | 25.68     | 25.50  |
|      | MCP    | 25.52 | 25.50  | 25.52 | 25.50  | 25.68     | 25.68     | 25.68     | 25.68     | 25.51  |
| 19a  | LASSO  | 13.39 | 11.74  | 13.49 | 11.76  | 11.83     | 11.82     | 11.85     | 11.82     | 11.85  |
|      | SCAD   | 11.71 | 11.51  | 11.70 | 11.53  | 11.82     | 11.84     | 11.78     | 11.81     | 11.69  |
|      | MCP    | 11.61 | 11.51  | 11.59 | 11.53  | 11.83     | 11.84     | 11.80     | 11.81     | 11.76  |
| 19b  | LASSO  | 25.74 | 25.57  | 25.75 | 25.57  | 25.68     | 25.68     | 25.68     | 25.68     | 25.58  |
|      | SCAD   | 25.56 | 25.54  | 25.56 | 25.54  | 25.68     | 25.68     | 25.67     | 25.67     | 25.55  |
|      | MCP    | 25.54 | 25.54  | 25.54 | 25.54  | 25.68     | 25.68     | 25.67     | 25.68     | 25.55  |

| Case | Method | AIC1  | AIC2   | BIC1  | BIC2   | $L_q$ -A1 | $L_q$ -A2 | $L_q$ -B1 | $L_q$ -B2 | CV      |
|------|--------|-------|--------|-------|--------|-----------|-----------|-----------|-----------|---------|
| 20a  | LASSO  | 14.50 | 11.77  | 14.61 | 11.79  | 11.81     | 11.78     | 11.83     | 11.78     | 11.81   |
|      | SCAD   | 11.40 | 11.41  | 11.39 | 11.39  | 11.77     | 11.77     | 11.76     | 11.76     | 11.41   |
|      | MCP    | 11.41 | 11.41  | 11.39 | 11.39  | 11.80     | 11.80     | 11.79     | 11.79     | 11.43   |
| 20b  | LASSO  | 25.94 | 25.58  | 25.94 | 25.58  | 25.67     | 25.67     | 25.67     | 25.67     | 25.59   |
|      | SCAD   | 25.50 | 25.50  | 25.50 | 25.50  | 25.68     | 25.68     | 25.67     | 25.67     | 25.50   |
|      | MCP    | 25.50 | 25.50  | 25.50 | 25.50  | 25.68     | 25.68     | 25.67     | 25.68     | 25.50   |
| 21a  | LASSO  | -     | 15.06  | -     | 14.46  | -         | 21.40     | -         | 21.01     | 14.53   |
|      | SCAD   | -     | 19.49  | -     | 14.47  | -         | 25.17     | -         | 24.80     | 14.49   |
|      | MCP    | -     | 21.77  | -     | 14.53  | -         | 25.25     | -         | 24.79     | 14.49   |
| 21b  | LASSO  | 12.67 | 12.67  | 12.67 | 12.67  | 13.44     | 13.79     | 13.20     | 13.56     | 12.68   |
|      | SCAD   | 12.67 | 12.67  | 12.67 | 12.67  | 13.73     | 13.86     | 13.41     | 13.73     | 12.68   |
|      | MCP    | 12.67 | 12.68  | 12.67 | 12.67  | 13.79     | 13.86     | 13.54     | 13.72     | 12.68   |
| 22a  | LASSO  | -     | 21.17  | -     | 21.00  | -         | 23.17     | -         | 23.17     | 22.09   |
|      | SCAD   | -     | 24.98  | -     | 22.62  | -         | 25.59     | -         | 25.61     | 39.41   |
|      | MCP    | -     | 25.46  | -     | 23.14  | -         | 25.46     | -         | 25.47     | 41.60   |
| 22b  | LASSO  | 14.10 | 13.49  | 14.37 | 13.52  | 13.75     | 13.87     | 13.86     | 13.83     | 13.50   |
|      | SCAD   | 14.06 | 13.52  | 14.31 | 13.55  | 13.83     | 13.88     | 13.86     | 13.84     | 13.55   |
|      | MCP    | 13.80 | 13.53  | 13.97 | 13.57  | 13.85     | 13.87     | 13.81     | 13.83     | 13.56   |
| 23a  | LASSO  | -     | 245.48 | -     | 246.07 | -         | 245.48    | -         | 245.48    | 251.43  |
|      | SCAD   | -     | 152.74 | -     | 155.40 | -         | 149.72    | -         | 149.72    | 1750.79 |
|      | MCP    | -     | 109.89 | -     | 110.85 | -         | 107.95    | -         | 107.95    | 1504.74 |
| 23b  | LASSO  | 21.35 | 13.75  | 21.74 | 13.78  | 13.79     | 13.85     | 13.93     | 13.84     | 13.76   |
|      | SCAD   | 13.88 | 13.42  | 13.88 | 13.42  | 13.82     | 13.87     | 13.68     | 13.81     | 13.42   |
|      | MCP    | 13.52 | 13.42  | 13.52 | 13.41  | 13.85     | 13.87     | 13.74     | 13.81     | 13.42   |
| 24a  | LASSO  | -     | 22552  | -     | 22755  | -         | 22466     | -         | 22466     | 22979   |
|      | SCAD   | -     | 13215  | -     | 13410  | -         | 12520     | -         | 12520     | 167250  |
|      | MCP    | -     | 8963   | -     | 9051   | -         | 8513      | -         | 8513      | 149655  |
| 24b  | LASSO  | 23.77 | 13.79  | 24.16 | 13.81  | 13.81     | 13.81     | 13.93     | 13.81     | 13.80   |
|      | SCAD   | 13.37 | 13.37  | 13.37 | 13.37  | 13.76     | 13.76     | 13.68     | 13.75     | 13.38   |
|      | MCP    | 13.37 | 13.38  | 13.37 | 13.37  | 13.81     | 13.81     | 13.74     | 13.79     | 13.38   |
| 25a  | LASSO  | 10.74 | 10.76  | 10.74 | 10.74  | 11.58     | 11.77     | 11.45     | 11.66     | 10.78   |
|      | SCAD   | 10.74 | 10.76  | 10.74 | 10.74  | 11.75     | 11.82     | 11.62     | 11.75     | 10.78   |
|      | MCP    | 10.75 | 10.77  | 10.74 | 10.74  | 11.79     | 11.82     | 11.69     | 11.76     | 10.80   |
| 25b  | LASSO  | 25.41 | 25.42  | 25.41 | 25.42  | 25.65     | 25.67     | 25.62     | 25.66     | 25.42   |
|      | SCAD   | 25.41 | 25.42  | 25.41 | 25.42  | 25.67     | 25.68     | 25.64     | 25.67     | 25.42   |
|      | MCP    | 25.41 | 25.42  | 25.41 | 25.42  | 25.68     | 25.68     | 25.65     | 25.67     | 25.42   |
| 26a  | LASSO  | 11.80 | 11.40  | 11.89 | 11.41  | 11.85     | 11.85     | 11.89     | 11.84     | 11.48   |
|      | SCAD   | 11.67 | 11.41  | 11.74 | 11.42  | 11.84     | 11.84     | 11.84     | 11.84     | 11.48   |
|      | MCP    | 11.55 | 11.42  | 11.58 | 11.43  | 11.84     | 11.85     | 11.84     | 11.84     | 11.50   |
| 26b  | LASSO  | 25.56 | 25.50  | 25.57 | 25.51  | 25.68     | 25.68     | 25.69     | 25.68     | 25.51   |
|      | SCAD   | 25.56 | 25.50  | 25.57 | 25.51  | 25.68     | 25.68     | 25.69     | 25.68     | 25.52   |
|      | MCP    | 25.53 | 25.51  | 25.53 | 25.51  | 25.68     | 25.68     | 25.68     | 25.68     | 25.52   |
| 27a  | LASSO  | 13.35 | 11.78  | 13.47 | 11.78  | 11.86     | 11.84     | 11.93     | 11.84     | 11.84   |
|      | SCAD   | 11.93 | 11.67  | 11.92 | 11.65  | 11.84     | 11.84     | 11.83     | 11.83     | 11.71   |
|      | MCP    | 11.78 | 11.67  | 11.77 | 11.66  | 11.84     | 11.84     | 11.83     | 11.83     | 11.71   |
| 27b  | LASSO  | 25.78 | 25.58  | 25.78 | 25.58  | 25.68     | 25.68     | 25.69     | 25.68     | 25.59   |
|      | SCAD   | 25.60 | 25.57  | 25.60 | 25.57  | 25.68     | 25.68     | 25.68     | 25.68     | 25.58   |
|      | MCP    | 25.59 | 25.57  | 25.59 | 25.57  | 25.68     | 25.68     | 25.68     | 25.68     | 25.58   |
| 28a  | LASSO  | 14.32 | 11.89  | 14.43 | 11.90  | 11.92     | 11.92     | 11.97     | 11.92     | 11.92   |
|      | SCAD   | 11.61 | 11.61  | 11.60 | 11.60  | 11.81     | 11.81     | 11.80     | 11.80     | 11.63   |
|      | MCP    | 11.62 | 11.62  | 11.61 | 11.61  | 11.82     | 11.82     | 11.82     | 11.82     | 11.65   |
| 28b  | LASSO  | 26.07 | 25.65  | 26.07 | 25.65  | 25.68     | 25.68     | 25.69     | 25.68     | 25.65   |
|      | SCAD   | 25.64 | 25.59  | 25.64 | 25.59  | 25.68     | 25.68     | 25.68     | 25.68     | 25.60   |
|      | MCP    | 25.59 | 25.59  | 25.59 | 25.59  | 25.68     | 25.68     | 25.68     | 25.68     | 25.60   |
| 29a  | LASSO  | -     | 15.41  | -     | 14.65  | -         | 21.42     | -         | 21.06     | 14.71   |
|      | SCAD   | -     | 21.32  | -     | 14.66  | -         | 25.17     | -         | 24.82     | 14.67   |
|      | MCP    | -     | 22.01  | -     | 14.74  | -         | 25.26     | -         | 14.82     | 14.69   |
| 29b  | LASSO  | 12.69 | 12.69  | 12.69 | 12.69  | 13.45     | 13.80     | 13.20     | 13.57     | 12.69   |
|      | SCAD   | 12.69 | 12.69  | 12.69 | 12.69  | 13.74     | 13.86     | 13.42     | 13.74     | 12.69   |
|      | MCP    | 12.69 | 12.69  | 12.69 | 12.69  | 13.80     | 13.86     | 13.55     | 13.73     | 12.69   |



| Case | Method | AIC1  | AIC2   | BIC1  | BIC2   | $L_q$ -A1 | $L_q$ -A2 | $L_q$ -B1 | $L_q$ -B2 | CV      |
|------|--------|-------|--------|-------|--------|-----------|-----------|-----------|-----------|---------|
| 30a  | LASSO  | -     | 22.43  | -     | 22.28  | -         | 24.22     | -         | 24.22     | 24.17   |
|      | SCAD   | -     | 25.50  | -     | 25.29  | -         | 26.08     | -         | 26.09     | 51.72   |
|      | MCP    | -     | 25.85  | -     | 24.98  | -         | 25.85     | -         | 25.86     | 54.17   |
| 30b  | LASSO  | 14.14 | 13.59  | 14.41 | 13.61  | 13.86     | 13.88     | 14.06     | 13.87     | 13.61   |
|      | SCAD   | 14.06 | 13.63  | 14.33 | 13.65  | 13.88     | 13.88     | 14.01     | 13.88     | 13.64   |
|      | MCP    | 13.84 | 13.64  | 14.03 | 13.67  | 13.88     | 13.88     | 13.91     | 13.88     | 13.66   |
| 31a  | LASSO  | -     | 346.97 | -     | 347.79 | -         | 346.97    | -         | 346.97    | 400.96  |
|      | SCAD   | -     | 205.04 | -     | 208.22 | -         | 199.80    | -         | 199.80    | 2953.96 |
|      | MCP    | -     | 147.26 | -     | 148.62 | -         | 144.35    | -         | 144.35    | 3098.65 |
| 31b  | LASSO  | 22.53 | 13.84  | 23.21 | 13.86  | 13.91     | 13.87     | 14.23     | 13.87     | 13.85   |
|      | SCAD   | 14.10 | 13.66  | 14.13 | 13.66  | 13.86     | 13.88     | 13.79     | 13.85     | 13.66   |
|      | MCP    | 13.79 | 13.66  | 13.79 | 13.66  | 13.87     | 13.88     | 13.82     | 13.85     | 13.66   |
| 32a  | LASSO  | -     | 32921  | -     | 33219  | -         | 32608     | -         | 32608     | 38121   |
|      | SCAD   | -     | 18611  | -     | 18926  | -         | 17490     | -         | 17490     | 302241  |
|      | MCP    | -     | 12751  | -     | 12914  | -         | 12066     | -         | 12066     | 299829  |
| 32b  | LASSO  | 50.71 | 14.00  | 54.63 | 14.00  | 14.01     | 14.00     | 14.23     | 14.00     | 14.00   |
|      | SCAD   | 13.63 | 13.63  | 13.63 | 13.63  | 13.82     | 13.82     | 13.79     | 13.81     | 13.63   |
|      | MCP    | 13.63 | 13.63  | 13.63 | 13.63  | 13.84     | 13.84     | 13.82     | 13.83     | 13.64   |
